# Supplementary material for: Exploring the genetic diversity within traditional Philippine pigmented Rice
Source: Rice (N Y). 2019 Apr 30;12:27. doi: 10.1186/s12284-019-0281-2 (PMC6491523; doi:10.1186/s12284-019-0281-2)
Supplement: Supplementary file 2 — Table S1. The 307 unique Philippine pigmented rice accessions used to assess genetic diversity. Table S2. Pairewise FST comparison between rice varietal types and regions among the 307 unique accessions. Table S3. Pairewise FST comparison between regions considering only the indica accessions among the 307 unique accessions. Table S4. Pairewise FST comparison between regions considering only the japonica accessions among the 307 unique accessions. Table S5. Descriptive statistics of colour parameters and geometric-related traits. Table S6. Data: Intensity by Colour. Table S7. Passport information on the 696 Philippine traditional pigmented rice accession collected. Table S8. Accessions from neigbouring countries used in this study. (XLSX 171 kb) [file 12284_2019_281_MOESM2_ESM.xlsx]

## Sheet: Sheet 1
Exploring the Genetic Potential within Traditional Philippine Pigmented Rice
Edwige Gaby N. Mbanjo1, Huw Jones2, Xavier G. I. Caguiat3, Socorro Carandang1, John Carlos Ignacio1, Nelzo Ereful2, Marilyn C. Ferrer3, Lesley A. Boyd2, Tobias Kretzschmar1
1International Rice Research Institute (IRRI), Pili Drive, Los Baños, 4031 Laguna, Philippines
2National Institute of Agricultural Botany (NIAB)
3Philippine Rice Research Institute (PhilRice), Maligaya, Science City of Muñoz, Nueva Ecija 3119, Philippines
Corresponding author:
Lesley A. Boyd,
NIAB, Cambridge, UK
lesley.boyd@niab.com

## Sheet: Table S1
The 307 unique Philippine pigmented rice accessions used to assess genetic diversity
Num	Samples	Accession	Collection	Caryopsiscolordescriptors	Caryopsis color	Rice_varieties	Province	Region	Region2	The_regional_designation	New_defined_regions	V1 (Q1 matrix at K =2)	V2 (Q2 matrix at K =2)	Subspecies_phylo	subspecies	Hetorozygosity Rate	inbreeding coefficient (f)	RC screening	Videometer data	Area	Length	Width	Roundness	L*	a*	b*	Intensity	Hue	Saturation
1	12382	NA	NA	5-070-Red	Red	KALINAYAN _BULAWANON	Samar	Eastern Visayas	Eastern Visayas	Region VIII	Visayas	1e-05	0.99999	trop1	japonica	0.015625	0.955496	NA	NA	NA	NA	NA	NA	NA	NA	NA	NA	NA	NA
2	12383	NA	NA	5-070-Red	Red	KALINAYAN _MONOS	Samar	Eastern Visayas	Eastern Visayas	Region VIII	Visayas	1e-05	0.99999	trop1	japonica	0.0156556	0.9554	NA	NA	NA	NA	NA	NA	NA	NA	NA	NA	NA	NA
3	12678	NA	NA	5-070-Red	Red	BRILLANTE	Bulacan	Central Luzon	Central Luzon	Region III	Central Luzon	1e-05	0.99999	trop1	japonica	0.00912052	0.974019	NA	NA	NA	NA	NA	NA	NA	NA	NA	NA	NA	NA
4	12699	NA	NA	5-070-Red	Red	BLACK RICE	South Cotabato	Soccsksargen	Soccsksargen	Region XII	Mindanao2	0.99999	1e-05	indx	Indica	0.0215827	0.938502	NA	NA	NA	NA	NA	NA	NA	NA	NA	NA	NA	NA
5	12700	NA	NA	5-070-Red	Red	KASAGPI	South Cotabato	Soccsksargen	Soccsksargen	Region XII	Mindanao2	1e-05	0.99999	trop1	japonica	0.0149935	0.957276	NA	NA	NA	NA	NA	NA	NA	NA	NA	NA	NA	NA
6	12746	NA	NA	5-070-Red	Red	GALO	Aurora	Central Luzon	Central Luzon	Region III	Central Luzon	1e-05	0.99999	trop1	japonica	0.0195567	0.944306	NA	NA	NA	NA	NA	NA	NA	NA	NA	NA	NA	NA
7	12795	NA	NA	5-070-Red	Red	MARIA GAKIT	Misamis Oriental	Northern Mindanao	Northern Mindanao	Region X	Mindanao1	1e-05	0.99999	trop1	japonica	0.0150033	0.957275	NA	NA	NA	NA	NA	NA	NA	NA	NA	NA	NA	NA
8	12796	NA	NA	5-070-Red	Red	SPEAKER	Misamis Oriental	Northern Mindanao	Northern Mindanao	Region X	Mindanao1	1e-05	0.99999	trop1	japonica	0.0143322	0.959168	NA	NA	NA	NA	NA	NA	NA	NA	NA	NA	NA	NA
9	13914	NA	NA	5-070-Red	Red	DINORADO _PUTI	Maguindanao	Autonomous Region in Muslim Mindanao	ARMM	ARMM	Mindanao1	1e-05	0.99999	trop1	japonica	0.0143229	0.959204	NA	NA	NA	NA	NA	NA	NA	NA	NA	NA	NA	NA
10	14072	NA	NA	5-070-Red	Red	DINORADO	Zamboanga del Norte	Zamboanga Peninsula	Zamboanga Peninsula	Region IX	Mindanao1	0.065782	0.934218	trop1	japonica	0.0169602	0.951693	NA	NA	NA	NA	NA	NA	NA	NA	NA	NA	NA	NA
11	14077	NA	NA	5-070-Red	Red	ISMAGOL	Zamboanga del Norte	Zamboanga Peninsula	Zamboanga Peninsula	Region IX	Mindanao1	1e-05	0.99999	trop1	japonica	0.0378096	0.892325	NA	NA	NA	NA	NA	NA	NA	NA	NA	NA	NA	NA
12	14253	NA	NA	5-070-Red	Red	PINILI	Mountain Province	Cordillera Administrative Region	CAR	CAR	CAR	1e-05	0.99999	trop1	japonica	0.00912647	0.974007	NA	NA	NA	NA	NA	NA	NA	NA	NA	NA	NA	NA
13	14259	NA	NA	NA	NA	NA	Aurora	Central Luzon	Central Luzon	Region III	Central Luzon	1e-05	0.99999	trop1	japonica	0.0110749	0.968448	NA	NA	NA	NA	NA	NA	NA	NA	NA	NA	NA	NA
14	14277	NA	NA	5-070-Red	Red	DENORADO	Palawan	Mimaropa	Mimaropa	Region IVB	Mimaropa	1e-05	0.99999	trop1	japonica	0.00651042	0.981457	NA	NA	NA	NA	NA	NA	NA	NA	NA	NA	NA	NA
15	14278	NA	NA	5-070-Red	Red	DURYAT	Palawan	Mimaropa	Mimaropa	Region IVB	Mimaropa	0.015908	0.984092	trop1	japonica	0.0169492	0.951715	NA	NA	NA	NA	NA	NA	NA	NA	NA	NA	NA	NA
16	14279	NA	NA	NA	NA	NA	Aurora	Central Luzon	Central Luzon	Region III	Central Luzon	1e-05	0.99999	trop1	japonica	0.00651042	0.981457	NA	NA	NA	NA	NA	NA	NA	NA	NA	NA	NA	NA
17	14759	NA	NA	5-070-Red	Red	AZUCENA	Sultan Kudarat	Soccsksargen	Soccsksargen	Region XII	Mindanao2	1e-05	0.99999	trop1	japonica	0.018241	0.948032	NA	NA	NA	NA	NA	NA	NA	NA	NA	NA	NA	NA
18	14760	NA	NA	5-070-Red	Red	DINORADO	North Cotabato	Soccsksargen	Soccsksargen	Region XII	Mindanao2	1e-05	0.99999	trop1	japonica	0.0130378	0.96285	NA	NA	NA	NA	NA	NA	NA	NA	NA	NA	NA	NA
19	14762	NA	NA	5-070-Red	Red	PALAWAN RED	Isabela	Cagayan Valley	Cagayan Valley	Region II	Cagayan Valley	1e-05	0.99999	trop1	japonica	0.0156556	0.955404	NA	NA	NA	NA	NA	NA	NA	NA	NA	NA	NA	NA
20	14764	NA	NA	5-070-Red	Red	PINILISA	Isabela	Cagayan Valley	Cagayan Valley	Region II	Cagayan Valley	1e-05	0.99999	trop1	japonica	0.0188925	0.946174	NA	NA	NA	NA	NA	NA	NA	NA	NA	NA	NA	NA
21	15239	NA	NA	5-070-Red	Red	KINANDA RED	Batangas	Calabarzon	Calabarzon	Region IVA	Calabarzon	1e-05	0.99999	trop1	japonica	0.0136719	0.961059	NA	NA	NA	NA	NA	NA	NA	NA	NA	NA	NA	NA
22	15247	NA	NA	5-070-Red	Red	BUTWA BLACK	Rizal	Calabarzon	Calabarzon	Region IVA	Calabarzon	0.014158	0.985842	trop1	japonica	0.00977199	0.972161	NA	NA	NA	NA	NA	NA	NA	NA	NA	NA	NA	NA
23	15249	NA	NA	5-070-Red	Red	RENOMERO	Rizal	Calabarzon	Calabarzon	Region IVA	Calabarzon	1e-05	0.99999	trop1	japonica	0.0156556	0.955387	NA	NA	NA	NA	NA	NA	NA	NA	NA	NA	NA	NA
24	15250	NA	NA	5-070-Red	Red	KALIBO	Zambales	Central Luzon	Central Luzon	Region III	Central Luzon	1e-05	0.99999	trop1	japonica	0.015625	0.955496	NA	NA	NA	NA	NA	NA	NA	NA	NA	NA	NA	NA
25	15251	NA	NA	5-070-Red	Red	BATIOKAN	Davao del Sur	Davao Region	Davao Region	Region XI	Mindanao3	1e-05	0.99999	trop1	japonica	0.0156454	0.955417	NA	NA	NA	NA	NA	NA	NA	NA	NA	NA	NA	NA
26	15252	NA	NA	5-070-Red	Red	LUBANG	Bohol	Central Visayas	Central Visayas	Region VII	Visayas	0.99999	1e-05	indx	Indica	0.0169492	0.951729	NA	NA	NA	NA	NA	NA	NA	NA	NA	NA	NA	NA
27	15258	NA	NA	5-070-Red	Red	BINISAYA	Rizal	Calabarzon	Calabarzon	Region IVA	Calabarzon	1e-05	0.99999	trop1	japonica	0.015625	0.955496	NA	NA	NA	NA	NA	NA	NA	NA	NA	NA	NA	NA
28	15259	NA	NA	5-070-Red	Red	BINUNDOK	Zambales	Central Luzon	Central Luzon	Region III	Central Luzon	0.99999	1e-05	indx	Indica	0.0162973	0.953585	NA	NA	NA	NA	NA	NA	NA	NA	NA	NA	NA	NA
29	15262	NA	NA	5-070-Red	Red	KABUDIT	Albay	Bicol Region	Bicol Region	Region V	Bicol Region	0.99999	1e-05	indx	Indica	0.0215264	0.938664	NA	NA	NA	NA	NA	NA	NA	NA	NA	NA	NA	NA
30	15381	NA	NA	5-070-Red	Red	HINOMAY	Northern Samar	Eastern Visayas	Eastern Visayas	Region VIII	Visayas	1e-05	0.99999	trop1	japonica	0.0156352	0.955467	NA	NA	NA	NA	NA	NA	NA	NA	NA	NA	NA	NA
31	15382	NA	NA	5-070-Red	Red	LIBO-LIBO	Davao Oriental	Davao Region	Davao Region	Region XI	Mindanao3	1e-05	0.99999	trop1	japonica	0.0162973	0.953573	NA	NA	NA	NA	NA	NA	NA	NA	NA	NA	NA	NA
32	15460	NA	NA	5-070-Red	Red	JARNANG	Tawi Tawi	Autonomous Region in Muslim Mindanao	ARMM	ARMM	Mindanao1	1e-05	0.99999	trop1	japonica	0.0886243	0.747362	NA	NA	NA	NA	NA	NA	NA	NA	NA	NA	NA	NA
33	15461	NA	NA	5-070-Red	Red	ZAMBALES	Tawi Tawi	Autonomous Region in Muslim Mindanao	ARMM	ARMM	Mindanao1	1e-05	0.99999	trop1	japonica	0.0143416	0.959157	NA	NA	NA	NA	NA	NA	NA	NA	NA	NA	NA	NA
34	15462	NA	NA	5-070-Red	Red	PUTAN PIKPIKAN	Tawi Tawi	Autonomous Region in Muslim Mindanao	ARMM	ARMM	Mindanao1	1e-05	0.99999	trop1	japonica	0.0149935	0.957288	NA	NA	NA	NA	NA	NA	NA	NA	NA	NA	NA	NA
35	15485	NA	NA	5-070-Red	Red	MALAGKIT KAPA	Basilan	Autonomous Region in Muslim Mindanao	ARMM	ARMM	Mindanao1	1e-05	0.99999	trop1	japonica	0.0110894	0.968405	NA	NA	NA	NA	NA	NA	NA	NA	NA	NA	NA	NA
36	15526	NA	NA	5-070-Red	Red	RODEL RODEL	Palawan	Mimaropa	Mimaropa	Region IVB	Mimaropa	1e-05	0.99999	trop1	japonica	0.0110894	0.968399	NA	NA	NA	NA	NA	NA	NA	NA	NA	NA	NA	NA
37	15602	NA	NA	5-070-Red	Red	GALO	Zambales	Central Luzon	Central Luzon	Region III	Central Luzon	1e-05	0.99999	trop1	japonica	0.0201954	0.942463	NA	NA	NA	NA	NA	NA	NA	NA	NA	NA	NA	NA
38	15614	NA	NA	5-070-Red	Red	KABOYO	Masbate	Bicol Region	Bicol Region	Region V	Bicol Region	1e-05	0.99999	trop1	japonica	0.015625	0.955496	NA	NA	NA	NA	NA	NA	NA	NA	NA	NA	NA	NA
39	15617	NA	NA	5-070-Red	Red	DUKOT	Masbate	Bicol Region	Bicol Region	Region V	Bicol Region	1e-05	0.99999	trop1	japonica	0.0156454	0.955419	NA	NA	NA	NA	NA	NA	NA	NA	NA	NA	NA	NA
40	15618	NA	NA	5-070-Red	Red	KIRABAN	North Cotabato	Soccsksargen	Soccsksargen	Region XII	Mindanao2	1e-05	0.99999	trop1	japonica	0.0150033	0.957264	NA	NA	NA	NA	NA	NA	NA	NA	NA	NA	NA	NA
41	15620	NA	NA	5-070-Red	Red	TANGGILING	North Cotabato	Soccsksargen	Soccsksargen	Region XII	Mindanao2	0.99999	1e-05	indx	Indica	0.0465574	0.867411	NA	NA	NA	NA	NA	NA	NA	NA	NA	NA	NA	NA
42	15647	NA	NA	5-070-Red	Red	PEKITAN	Zamboanga Sibugay	Zamboanga Peninsula	Zamboanga Peninsula	Region IX	Mindanao1	1e-05	0.99999	trop1	japonica	0.0149837	0.957314	NA	NA	NA	NA	NA	NA	NA	NA	NA	NA	NA	NA
43	15648	NA	NA	5-070-Red	Red	KABANGALAN	Basilan	Autonomous Region in Muslim Mindanao	ARMM	ARMM	Mindanao1	0.079015	0.920985	trop1	japonica	0.0130463	0.962832	NA	NA	NA	NA	NA	NA	NA	NA	NA	NA	NA	NA
44	15649	NA	NA	5-070-Red	Red	ALONG-ALONG	Basilan	Autonomous Region in Muslim Mindanao	ARMM	ARMM	Mindanao1	1e-05	0.99999	trop1	japonica	0.014974	0.95735	NA	NA	NA	NA	NA	NA	NA	NA	NA	NA	NA	NA
45	12679-B	NA	NA	5-070-Red	Red	BINERNAL WHITE	Bulacan	Central Luzon	Central Luzon	Region III	Central Luzon	0.99999	1e-05	indx	Indica	0.0202218	0.942403	NA	NA	NA	NA	NA	NA	NA	NA	NA	NA	NA	NA
46	12780-0	NA	NA	NA	NA	NA	Ilocos Sur	Ilocos Region	Ilocos Region	Region I	Ilocos Region	0.017094	0.982906	trop1	japonica	0.0117417	0.966536	NA	NA	NA	NA	NA	NA	NA	NA	NA	NA	NA	NA
47	12780-A	NA	NA	5-070-Red	Red	DUMUDAO	Bukidnon	Northern Mindanao	Northern Mindanao	Region X	Mindanao1	1e-05	0.99999	trop1	japonica	0.0143416	0.959133	NA	NA	NA	NA	NA	NA	NA	NA	NA	NA	NA	NA
48	12798-A	NA	NA	5-070-Red	Red	DINORADO	North Cotabato	Soccsksargen	Soccsksargen	Region XII	Mindanao2	1e-05	0.99999	trop1	japonica	0.105229	0.700434	NA	NA	NA	NA	NA	NA	NA	NA	NA	NA	NA	NA
49	12798-B	NA	NA	5-070-Red	Red	DINORADO	North Cotabato	Soccsksargen	Soccsksargen	Region XII	Mindanao2	1e-05	0.99999	trop1	japonica	0.0390879	0.888659	NA	NA	NA	NA	NA	NA	NA	NA	NA	NA	NA	NA
50	12801-B	NA	NA	5-070-Red	Red	DINORADO	North Cotabato	Soccsksargen	Soccsksargen	Region XII	Mindanao2	1e-05	0.99999	trop1	japonica	0.0162866	0.953599	NA	NA	NA	NA	NA	NA	NA	NA	NA	NA	NA	NA
51	12811-A	NA	NA	5-070-Red	Red	KASAGPI	Sultan Kudarat	Soccsksargen	Soccsksargen	Region XII	Mindanao2	0.558936	0.441064	admix	admix	0.518738	-0.478974	NA	NA	NA	NA	NA	NA	NA	NA	NA	NA	NA	NA
52	12846-A	NA	NA	5-070-Red	Red	KINAMUROS	Quezon	Calabarzon	Calabarzon	Region IVA	Calabarzon	1e-05	0.99999	trop1	japonica	0.0130463	0.962822	NA	NA	NA	NA	NA	NA	NA	NA	NA	NA	NA	NA
53	12849-A	NA	NA	5-070-Red	Red	MALIDO RED	Iloilo	Western Visayas	Western Visayas	Region VI	Visayas	1e-05	0.99999	trop1	japonica	0.0123859	0.964703	NA	NA	NA	NA	NA	NA	NA	NA	NA	NA	NA	NA
54	12849-B	NA	NA	5-070-Red	Red	MALIDO RED	Iloilo	Western Visayas	Western Visayas	Region VI	Visayas	1e-05	0.99999	trop1	japonica	0.0143322	0.959168	NA	NA	NA	NA	NA	NA	NA	NA	NA	NA	NA	NA
55	PTRV1	PRRI003109	3852	5-070-Red	Red	REMELITES	Zamboanga del Sur	Zamboanga Peninsula	Zamboanga Peninsula	Region IX	Mindanao1	1e-05	0.99999	trop1	japonica	0.00911458	0.974039	No deletion	Scanned accession	12.9263	6.43635	2.54636	2.34353	60.0272	13.6659	23.9359	29.113	141.465	22.1748
56	PTRV10	PRRI003194	3952	5-070-Red	Red	KOBBEH	Mindanao	Autonomous Region in Muslim Mindanao	ARMM	ARMM	Mindanao1	0.976462	0.023538	ind3	Indica	0.008519	0.975731	No deletion	NA	NA	NA	NA	NA	NA	NA	NA	NA	NA	NA
57	PTRV101	PRRI005792	10886	5-070-Red	Red	DORYAT	Palawan	Mimaropa	Mimaropa	Region IVB	Mimaropa	0.013391	0.986609	trop1	japonica	0.00978474	0.972118	No deletion	Scanned accession	10.4892	6.5078	1.96484	2.72924	55.3584	16.2258	25.6699	24.7971	138.837	21.8359
58	PTRV103	PRRI005867	10857	5-070-Red	Red	KINAKAW	Aurora	Central Luzon	Central Luzon	Region III	Central Luzon	1e-05	0.99999	trop1	japonica	0.0078125	0.977748	No deletion	Scanned accession	10.2884	6.26368	2.07797	2.58825	61.9457	11.9391	22.5631	31.1616	142.413	22.002
59	PTRV105	PRRI005873	10920-A	7-080-Purple	Purple	LINANOS	Palawan	Mimaropa	Mimaropa	Region IVB	Mimaropa	1e-05	0.99999	trop1	japonica	0.00455729	0.98702	Deletion	Scanned accession	12.2407	6.07315	2.55033	2.27481	27.665	1.76775	-0.427066	7.47623	184.839	1.19884
60	PTRV106	PRRI005885	10924	5-070-Red	Red	MANGATAS	Palawan	Mimaropa	Mimaropa	Region IVB	Mimaropa	0.006522	0.993478	trop1	japonica	0.00586701	0.983288	No deletion	Scanned accession	12.1102	6.04933	2.45109	2.23634	56.221	13.6757	23.1803	25.3449	140.472	19.5467
61	PTRV107	PRRI005888	10885	5-070-Red	Red	MILAGROSA (PULA)	Palawan	Mimaropa	Mimaropa	Region IVB	Mimaropa	1e-05	0.99999	trop1	japonica	0.00651466	0.981441	No deletion	Scanned accession	13.0076	7.36121	2.20499	2.81834	61.8836	17.2051	29.2542	31.4226	140.09	28.9269
62	PTRV108	PRRI005893	10844	5-070-Red	Red	MININDORO (PULA)	Aurora	Central Luzon	Central Luzon	Region III	Central Luzon	1e-05	0.99999	trop1	japonica	0.0110749	0.968448	No deletion	Scanned accession	12.1828	6.95435	2.20499	2.62757	61.1288	12.5098	23.3998	30.0052	142.479	21.7446
63	PTRV110	PRRI007120	12381	5-070-Red	Red	BAYSILANON	Samar	Eastern Visayas	Eastern Visayas	Region VIII	Visayas	1e-05	0.99999	trop1	japonica	0.00912052	0.974016	No deletion	Scanned accession	7.99276	4.80493	2.09583	2.19125	60.4184	12.1382	22.6345	29.5315	142.061	21.1737
64	PTRV111	PRRI007112	11230-B	5-070-Red	Red	TOKPAL (RED)	Kalinga	Cordillera Administrative Region	CAR	CAR	CAR	0.834505	0.165495	indx	Indica	0.370079	-0.0532918	Ambiguous	Scanned accession	12.1386	6.31131	2.39155	2.44474	58.1216	15.8693	27.3806	27.3392	140.349	24.2099
65	PTRV113	PRRI007082	12328	7-080-Purple	Purple	PILIT TAPOL _DARK	Agusan del Sur	Caraga	Caraga	Region XIII	Mindanao3	1e-05	0.99999	trop1	japonica	0.00651466	0.981441	No deletion	Scanned accession	11.126	5.98185	2.33995	2.345	33.6936	6.03991	5.01286	10.01	130.362	2.43266
66	PTRV114	PRRI007081	12330	5-070-Red	Red	PILIT TAPOL	Agusan del Sur	Caraga	Caraga	Region XIII	Mindanao3	1e-05	0.99999	trop1	japonica	0.00586319	0.983297	No deletion	Scanned accession	13.0283	6.80947	2.48086	2.51877	70.3152	9.62198	20.379	41.1429	145.186	23.725
67	PTRV115	PRRI007080	12329	7-080-Purple	Purple	PILIT TAPOL	Agusan del Sur	Caraga	Caraga	Region XIII	Mindanao3	1e-05	0.99999	trop1	japonica	0.0293926	0.916351	No deletion	Scanned accession	10.9794	6.48199	2.09385	2.64755	28.7413	1.45447	0.319735	7.81915	186.049	1.20753
68	PTRV117	PRRI007059	7519	5-070-Red	Red	KINTUMAN (SABA)	Cordillera	Cordillera Administrative Region	CAR	CAR	CAR	0.547197	0.452803	admix	admix	0.541777	-0.546707	Ambiguous	Scanned accession	11.2498	5.54919	2.6317	2.18674	63.1249	14.6115	23.0334	33.0171	139.728	24.8768
69	PTRV119	PRRI007019	12341	5-070-Red	Red	DINORADO	Agusan del Sur	Caraga	Caraga	Region XIII	Mindanao3	0.999886	0.000114	ind3	Indica	0.00718485	0.979527	No deletion	Scanned accession	11.7733	6.50383	2.27247	2.5763	53.8243	17.3065	25.5632	23.7215	137.279	21.7824
70	PTRV12	PRRI003201	3959	5-070-Red	Red	MABULO	La Union	Ilocos Region	Ilocos Region	Region I	Ilocos Region	0.99999	1e-05	ind3	Indica	0.00781759	0.97774	No deletion	NA	NA	NA	NA	NA	NA	NA	NA	NA	NA	NA
71	PTRV120	PRRI007013	12349	6-088-Variable purple	Variable purple	BLACK RICE	Surigao del Sur	Caraga	Caraga	Region XIII	Mindanao3	1e-05	0.99999	trop1	japonica	0.00782269	0.977715	Deletion	Scanned accession	9.93736	4.96172	2.54834	2.08236	36.9254	7.4682	7.78909	11.7779	144.674	4.61623
72	PTRV121	PRRI007008	12379	6-088-Variable purple	Variable purple	BALATINAW	Benguet	Cordillera Administrative Region	CAR	CAR	CAR	0.265194	0.734806	trop1	admix	0.00979112	0.972113	Deletion	Scanned accession	12.0382	6.09696	2.4372	2.28563	29.2341	3.64186	0.206478	8.21189	193.366	1.5368
73	PTRV123	PRRI006564	6361	5-070-Red	Red	PALAWENYO	North Cotabato	Soccsksargen	Soccsksargen	Region XII	Mindanao2	1e-05	0.99999	trop1	japonica	0.00846354	0.975894	No deletion	Scanned accession	13.3939	7.59342	2.16728	2.86861	55.7332	16.0663	25.2275	25.1428	138.679	21.7208
74	PTRV124	PRRI006539	271	5-070-Red	Red	MURADO	Antique	Western Visayas	Western Visayas	Region VI	Visayas	0.999815	0.000185	indx	Indica	0.00981675	0.972046	No deletion	Scanned accession	11.3922	6.32917	2.20697	2.48524	56.3388	16.9437	25.6057	26.0029	138.014	23.3003
75	PTRV125	PRRI006529	6221	5-070-Red	Red	MAGSABUD*	Palawan	Mimaropa	Mimaropa	Region IVB	Mimaropa	1e-05	0.99999	trop1	japonica	0.00846354	0.975894	No deletion	Scanned accession	15.9988	7.38701	2.75078	2.52627	64.1773	15.5694	26.6587	33.794	140.981	27.9591
76	PTRV132	PRRI006325	7623	5-070-Red	Red	ALIMONA	Lanao del Sur	Autonomous Region in Muslim Mindanao	ARMM	ARMM	Mindanao1	0.99999	1e-05	ind3	Indica	0.00724161	0.979384	No deletion	Scanned accession	11.337	6.42444	2.14942	2.51624	55.8173	18.7735	29.2327	25.3394	138.032	25.0893
77	PTRV135	PRRI006293	11174	5-070-Red	Red	UNOY _LACHOK	Kalinga	Cordillera Administrative Region	CAR	CAR	CAR	1e-05	0.99999	trop1	japonica	0.0078125	0.977748	No deletion	NA	NA	NA	NA	NA	NA	NA	NA	NA	NA	NA
78	PTRV137	PRRI006271	11172	5-070-Red	Red	ULIKAN _RED	Kalinga	Cordillera Administrative Region	CAR	CAR	CAR	0.99999	1e-05	ind3	Indica	0.00913838	0.973977	No deletion	NA	NA	NA	NA	NA	NA	NA	NA	NA	NA	NA
79	PTRV140	PRRI006187	6245	1-010-White	White	MINANTIKA	Aurora	Central Luzon	Central Luzon	Region III	Central Luzon	1e-05	0.99999	trop1	japonica	0.00456026	0.987008	No deletion	Scanned accession	13.11	6.70229	2.4372	2.42877	62.47	16.1161	27.3761	31.8921	140.632	27.3654
80	PTRV141	PRRI005978	11163-A	5-070-Red	Red	DIKET (RED)	Kalinga	Cordillera Administrative Region	CAR	CAR	CAR	1e-05	0.99999	trop1	japonica	0.00976562	0.972185	No deletion	Scanned accession	15.4565	6.76382	2.95719	2.23753	65.5179	14.1261	24.5835	35.6615	141.346	27.3013
81	PTRV142	PRRI005931	10938-A	5-070-Red	Red	UNKNOWN	Palawan	Mimaropa	Mimaropa	Region IVB	Mimaropa	1e-05	0.99999	trop1	japonica	0.00456323	0.986997	No deletion	Scanned accession	12.1541	5.86476	2.60391	2.17908	59.72	14.4721	23.8613	29.031	140.042	22.8687
82	PTRV144	PRRI005917	10876	6-088-Variable purple	Variable purple	PIRURUTONG	Aurora	Central Luzon	Central Luzon	Region III	Central Luzon	1e-05	0.99999	trop1	japonica	0.00586701	0.983283	Deletion	Scanned accession	13.1469	6.55344	2.52651	2.36163	29.7387	3.44311	1.70325	8.25992	198.614	1.02482
83	PTRV145	PRRI003093	3833	7-080-Purple	Purple	TININTA	Palawan	Mimaropa	Mimaropa	Region IVB	Mimaropa	1e-05	0.99999	trop1	japonica	0.00585938	0.983311	Deletion	NA	NA	NA	NA	NA	NA	NA	NA	NA	NA	NA
84	PTRV147	PRRI003106	3849	6-088-Variable purple	Variable purple	PILIT TAPUL	Camarines Sur	Bicol Region	Bicol Region	Region V	Bicol Region	0.020137	0.979863	trop1	japonica	0.00651466	0.981441	No deletion	NA	NA	NA	NA	NA	NA	NA	NA	NA	NA	NA
85	PTRV150	PRRI003254	4013	5-070-Red	Red	SINANWAN	Occidental Mindoro	Mimaropa	Mimaropa	Region IVB	Mimaropa	1e-05	0.99999	trop1	japonica	0.00846906	0.975873	No deletion	Scanned accession	14.5448	6.95832	2.64956	2.38428	57.1833	15.4874	21.376	26.8722	136.981	20.9823
86	PTRV153	PRRI003284	4053	5-070-Red	Red	GALLIANO	Apayao	Cordillera Administrative Region	CAR	CAR	CAR	0.994689	0.005311	ind3	Indica	0.00854139	0.975638	No deletion	Scanned accession	12.4488	6.22994	2.47888	2.29196	54.6209	16.7935	24.3414	24.4004	137.385	21.3694
87	PTRV154	PRRI003290	4059	5-070-Red	Red	LINANGAN	Ifugao	Cordillera Administrative Region	CAR	CAR	CAR	0.99999	1e-05	ind3	Indica	0.00977199	0.97216	No deletion	NA	NA	NA	NA	NA	NA	NA	NA	NA	NA	NA
88	PTRV155	PRRI003339	4112	5-070-Red	Red	CARABAO	Zamboanga del Sur	Zamboanga Peninsula	Zamboanga Peninsula	Region IX	Mindanao1	0.99999	1e-05	ind1B	Indica	0.00850785	0.975777	Deletion	Scanned accession	14.775	8.00425	2.27842	2.82945	61.9832	17.6162	28.5189	31.6323	139.334	28.9648
89	PTRV156	PRRI003351	4126	5-070-Red	Red	LUBANG	Zamboanga del Norte	Zamboanga Peninsula	Zamboanga Peninsula	Region IX	Mindanao1	0.99999	1e-05	indx	Indica	0.0104302	0.970279	No deletion	Scanned accession	12.8044	5.98979	2.63964	2.21984	60.5725	16.601	27.0487	30.1259	139.597	26.5848
90	PTRV157	PRRI003392	4175	5-070-Red	Red	LUBANG	Metropolitan Manila	National Capital Region	NCR	NCR	NCR	0.99999	1e-05	indx	Indica	0.0123698	0.964767	No deletion	Scanned accession	12.7322	5.88262	2.67735	2.23625	58.3274	16.8605	27.1453	27.7707	139.32	24.8733
91	PTRV16	PRRI003225	3984	5-070-Red	Red	MINANOK	Ilocos Sur	Ilocos Region	Ilocos Region	Region I	Ilocos Region	1e-05	0.99999	trop1	japonica	0.00846906	0.975877	No deletion	Scanned accession	15.9303	6.98015	2.87383	2.25489	57.2719	15.975	21.1908	27.082	136.328	21.3557
92	PTRV160	PRRI003526	4350	5-070-Red	Red	DINARUNAN	Nueva Vizcaya	Cagayan Valley	Cagayan Valley	Region II	Cagayan Valley	1e-05	0.99999	trop1	japonica	0.0110894	0.968417	No deletion	Scanned accession	15.4987	6.67649	2.91551	2.18896	64.0318	15.795	26.7896	33.9742	140.432	28.8417
93	PTRV162	PRRI003691	4517	5-070-Red	Red	KUTUBE-N	Cordillera	Cordillera Administrative Region	CAR	CAR	CAR	1e-05	0.99999	trop1	japonica	0.00912647	0.974009	No deletion	Scanned accession	16.928	6.94244	3.05841	2.23315	62.4379	14.9357	25.4952	31.9072	140.657	25.8093
94	PTRV163	PRRI003701	4527	5-070-Red	Red	LEGAGE-N	Cordillera	Cordillera Administrative Region	CAR	CAR	CAR	1e-05	0.99999	trop1	japonica	0.00912052	0.974017	No deletion	Scanned accession	16.4629	7.35724	2.85597	2.33632	64.5506	13.8585	21.6331	34.7786	139.549	24.8891
95	PTRV164	PRRI003791	4620	1-010-White	White	MENKARINKIN	Cordillera	Cordillera Administrative Region	CAR	CAR	CAR	1e-05	0.99999	trop1	japonica	0.00782269	0.977717	Deletion	NA	NA	NA	NA	NA	NA	NA	NA	NA	NA	NA
96	PTRV165	PRRI003803	4632	5-070-Red	Red	MILAGROSA	Catanduanes	Bicol Region	Bicol Region	Region V	Bicol Region	0.99999	1e-05	indx	Indica	0.175817	0.499289	No deletion	Scanned accession	11.6275	5.61865	2.57216	2.15091	62.7202	14.1822	24.9942	32.2541	141.039	25.5897
97	PTRV167	PRRI003925	4754	5-070-Red	Red	PARAY KADAPUG	Cordillera	Cordillera Administrative Region	CAR	CAR	CAR	1e-05	0.99999	trop1	japonica	0.00651042	0.981457	No deletion	Scanned accession	13.1	5.76949	2.85795	2.07201	62.0781	14.7588	24.0028	31.6893	140.162	24.7949
98	PTRV168	PRRI004194	5029	5-070-Red	Red	QADITAWAN	Nueva Vizcaya	Cagayan Valley	Cagayan Valley	Region II	Cagayan Valley	1e-05	0.99999	trop1	japonica	0.0104371	0.970262	No deletion	Scanned accession	17.0294	7.03572	3.00283	2.27074	57.0071	11.3696	19.4299	26.0065	141.06	16.9187
99	PTRV17	PRRI007129	12146	5-070-Red	Red	KAYACHENG	Mountain Province	Cordillera Administrative Region	CAR	CAR	CAR	0.99999	1e-05	ind3	Indica	0.00718016	0.979541	No deletion	NA	NA	NA	NA	NA	NA	NA	NA	NA	NA	NA
100	PTRV172	PRRI005644	6215	5-070-Red	Red	MACARANIAG	Ilocos Sur	Ilocos Region	Ilocos Region	Region I	Ilocos Region	0.99999	1e-05	ind3	Indica	0.0104849	0.970129	No deletion	NA	NA	NA	NA	NA	NA	NA	NA	NA	NA	NA
101	PTRV175	PRRI005884	10847	7-080-Purple	Purple	MALAGKIT-ITIM	Aurora	Central Luzon	Central Luzon	Region III	Central Luzon	1e-05	0.99999	trop1	japonica	0.00848564	0.975822	Deletion	Scanned accession	12.4595	6.25971	2.55826	2.38368	33.836	6.59	3.5303	10.4029	166.212	2.78977
102	PTRV176	PRRI006116	11052	5-070-Red	Red	KABUYOG	Misamis Oriental	Northern Mindanao	Northern Mindanao	Region X	Mindanao1	1e-05	0.99999	trop1	japonica	0.00912052	0.974028	No deletion	Scanned accession	12.2766	5.67621	2.78452	2.12686	63.3678	13.2305	21.2576	33.2903	140.08	23.3732
103	PTRV180	PRRI006307	7764	1-010-White	White	YOUNG MASTER	Lanao del Sur	Autonomous Region in Muslim Mindanao	ARMM	ARMM	Mindanao1	0.99999	1e-05	ind1B	Indica	0.00587851	0.983259	Deletion	NA	NA	NA	NA	NA	NA	NA	NA	NA	NA	NA
104	PTRV181	PRRI006314	7434	5-070-Red	Red	UNKNOWN QUIRINO GLUTINOUS RICE	Aurora	Central Luzon	Central Luzon	Region III	Central Luzon	1e-05	0.99999	trop1	japonica	0.0117264	0.966595	No deletion	Scanned accession	9.79068	5.81315	2.14545	2.45659	63.0371	15.3678	27.5008	32.595	141.201	27.8819
105	PTRV183	PRRI006337	10848	5-070-Red	Red	PALAWAN	Aurora	Central Luzon	Central Luzon	Region III	Central Luzon	1e-05	0.99999	trop1	japonica	0.00585938	0.983311	Deletion	NA	NA	NA	NA	NA	NA	NA	NA	NA	NA	NA
106	PTRV185	PRRI006374	6131	5-070-Red	Red	KAPUKTOY*	Palawan	Mimaropa	Mimaropa	Region IVB	Mimaropa	1e-05	0.99999	trop1	japonica	0.0084801	0.975849	No deletion	NA	NA	NA	NA	NA	NA	NA	NA	NA	NA	NA
107	PTRV186	PRRI006378	6365	7-080-Purple	Purple	PARIRUTONG	Aurora	Central Luzon	Central Luzon	Region III	Central Luzon	0.99999	1e-05	indx	Indica	0.00718954	0.979525	Deletion	Scanned accession	12.9944	6.82733	2.33399	2.45324	33.8058	11.1551	6.10058	10.5708	123.265	4.83134
108	PTRV187	PRRI006416	5889	5-070-Red	Red	BANGGI*	Palawan	Mimaropa	Mimaropa	Region IVB	Mimaropa	1e-05	0.99999	trop1	japonica	0.00716146	0.979602	No deletion	Scanned accession	12.5031	7.04168	2.19705	2.5935	62.4496	11.5259	20.2645	31.8861	141.772	20.6957
109	PTRV19	PRRI003239	3998	5-070-Red	Red	PINURSIGUE	Romblon	Mimaropa	Mimaropa	Region IVB	Mimaropa	0.99999	1e-05	indx	Indica	0.0149837	0.957326	No deletion	Scanned accession	12.0387	5.69606	2.60987	2.14952	61.0672	15.8182	26.2684	30.5689	139.97	25.8936
110	PTRV190	PRRI006519	6127	5-070-Red	Red	KAMBAL	Aurora	Central Luzon	Central Luzon	Region III	Central Luzon	1e-05	0.99999	trop1	japonica	0.00846354	0.975894	No deletion	Scanned accession	14.4765	7.11511	2.55033	2.47022	64.0491	15.3938	25.3291	33.9445	140.226	27.3841
111	PTRV191	PRRI007014	12352	6-088-Variable purple	Variable purple	BLACK RICE	Surigao del Sur	Caraga	Caraga	Region XIII	Mindanao3	0.99999	1e-05	indx	Indica	0.00652316	0.981413	No deletion	NA	NA	NA	NA	NA	NA	NA	NA	NA	NA	NA
112	PTRV192	PRRI007041	12382	5-070-Red	Red	KALINAYAN BULAWANON	Samar	Eastern Visayas	Eastern Visayas	Region VIII	Visayas	1e-05	0.99999	trop1	japonica	0.00846906	0.975876	No deletion	Scanned accession	8.78631	5.46385	2.03431	2.39044	61.0881	13.4362	22.7739	30.4859	140.729	22.4757
113	PTRV193	PRRI007042	12383	5-070-Red	Red	KALINAYAN MONOS	Samar	Eastern Visayas	Eastern Visayas	Region VIII	Visayas	1e-05	0.99999	trop1	japonica	0.00846906	0.975884	Deletion	Scanned accession	10.0605	5.61469	2.23674	2.25556	57.8532	14.7147	24.4618	27.1012	140.057	22.0829
114	PTRV196	PRRI000008	1991	5-070-Red	Red	AGLIPAY	Nueva Ecija	Central Luzon	Central Luzon	Region III	Central Luzon	0.99999	1e-05	ind3	Indica	0.00849673	0.975808	No deletion	Scanned accession	10.5694	5.25347	2.55231	2.11333	54.9507	16.3439	27.6889	24.2148	139.703	22.2307
115	PTRV197	PRRI000034	2017	5-070-Red	Red	SIPUR PUA (RED SIPOR)	Metropolitan Manila	National Capital Region	NCR	NCR	NCR	0.99999	1e-05	ind3	Indica	0.00787919	0.977561	No deletion	Scanned accession	11.7031	6.41055	2.2427	2.43643	60.3184	15.9318	25.0696	29.8944	139.077	25.0688
116	PTRV198	PRRI000063	2046	5-070-Red	Red	CALAMBI	Eastern Samar	Eastern Visayas	Eastern Visayas	Region VIII	Visayas	0.99999	1e-05	ind3	Indica	0.0104439	0.970236	No deletion	Scanned accession	11.8367	5.81315	2.53445	2.17936	56.8344	16.0304	24.9142	26.4083	138.543	22.7577
117	PTRV199	PRRI000065	2048	5-070-Red	Red	KASAYA	Bohol	Central Visayas	Central Visayas	Region VII	Visayas	0.99999	1e-05	ind3	Indica	0.00979112	0.972147	No deletion	Scanned accession	11.289	6.97023	1.92316	2.80043	57.666	11.6501	23.1526	26.5846	142.719	19.6363
118	PTRV2	PRRI003110	3853	5-070-Red	Red	SAMPOPOY	Iloilo	Western Visayas	Western Visayas	Region VI	Visayas	0.99999	1e-05	indx	Indica	0.00930851	0.973452	No deletion	Scanned accession	12.8404	6.7658	2.30224	2.53324	55.7955	16.8408	26.7798	25.21	138.727	22.9215
119	PTRV20	PRRI003241	4000	7-080-Purple	Purple	PUTAN MAKATIPU	Basilan	Autonomous Region in Muslim Mindanao	ARMM	ARMM	Mindanao1	1e-05	0.99999	trop1	japonica	0.0078125	0.977748	No deletion	Scanned accession	12.0279	6.65069	2.27644	2.47701	37.5751	9.15916	8.75669	12.346	120.236	5.75011
120	PTRV200	PRRI000077	670 / 2060	5-070-Red	Red	ESMIS-ISMIS	Nueva Ecija	Central Luzon	Central Luzon	Region III	Central Luzon	0.99999	1e-05	ind3	Indica	0.0104575	0.970218	No deletion	Scanned accession	10.0678	4.93791	2.61185	2.06397	55.5067	16.4008	27.1865	24.7859	139.382	22.5238
121	PTRV201	PRRI000084	2067	5-070-Red	Red	SALUGANUM	Nueva Ecija	Central Luzon	Central Luzon	Region III	Central Luzon	0.969022	0.030978	ind3	Indica	0.0581699	0.83427	No deletion	NA	NA	NA	NA	NA	NA	NA	NA	NA	NA	NA
122	PTRV205	PRRI000123	2106	5-070-Red	Red	MOTIT MOTIT	Metropolitan Manila	National Capital Region	NCR	NCR	NCR	0.99999	1e-05	ind3	Indica	0.319372	0.0909874	Deletion	Scanned accession	13.2652	6.4681	2.54636	2.30593	56.1399	16.255	25.8284	25.669	138.891	22.6539
123	PTRV207	PRRI000137	2120	5-070-Red	Red	TUKON-TUKOD	Metropolitan Manila	National Capital Region	NCR	NCR	NCR	0.99999	1e-05	ind3	Indica	0.00587084	0.983279	Ambiguous	NA	NA	NA	NA	NA	NA	NA	NA	NA	NA	NA
124	PTRV21	PRRI003243	4002	5-070-Red	Red	SALIMBOA	La Union	Ilocos Region	Ilocos Region	Region I	Ilocos Region	1e-05	0.99999	trop1	japonica	0.00846906	0.975888	No deletion	Scanned accession	15.3876	6.53757	2.98894	2.20736	61.9857	14.7253	25.1643	31.4169	140.666	25.2242
125	PTRV211	PRRI000153	2136	6-088-Variable purple	Variable purple	MARAGADAN	Metropolitan Manila	National Capital Region	NCR	NCR	NCR	0.927532	0.072468	ind3	Indica	0.00978474	0.972152	No deletion	NA	NA	NA	NA	NA	NA	NA	NA	NA	NA	NA
126	PTRV212	PRRI000154	2137	7-080-Purple	Purple	MARAGADAW	Albay	Bicol Region	Bicol Region	Region V	Bicol Region	0.943485	0.056515	ind3	Indica	0.00848564	0.975858	No deletion	Scanned accession	12.9966	6.70626	2.38758	2.47195	40.6182	10.2141	10.8436	14.2716	132.661	7.54155
127	PTRV213	PRRI000156	2139	5-070-Red	Red	KIANGAN RICE (BLACK)	Metropolitan Manila	National Capital Region	NCR	NCR	NCR	0.99999	1e-05	ind3	Indica	0.127771	0.636149	No deletion	Scanned accession	11.8659	5.99575	2.44911	2.34728	58.7338	14.3593	24.3825	28.1812	140.154	22.8467
128	PTRV215	PRRI000163	2146	5-070-Red	Red	ZARAGOSA	Pangasinan	Ilocos Region	Ilocos Region	Region I	Ilocos Region	0.99999	1e-05	ind3	Indica	0.00652316	0.981424	No deletion	Scanned accession	11.8042	6.08506	2.42132	2.29785	52.2022	16.5076	22.5048	22.2953	136.198	18.9707
129	PTRV216	PRRI000174	2157	5-070-Red	Red	MACAN PULOT	Nueva Ecija	Central Luzon	Central Luzon	Region III	Central Luzon	0.99999	1e-05	indx	Indica	0.0104507	0.970245	No deletion	Scanned accession	11.9359	6.38078	2.3459	2.43332	58.1963	15.8786	26.5027	27.508	139.741	24.0752
130	PTRV217	PRRI000178	2161	5-070-Red	Red	CAPUROY	Nueva Ecija	Central Luzon	Central Luzon	Region III	Central Luzon	0.99999	1e-05	ind3	Indica	0.0312907	0.910835	No deletion	Scanned accession	12.6139	6.55741	2.37369	2.44333	54.7988	16.8008	27.736	24.1879	139.375	22.3834
131	PTRV219	PRRI000187	2170	5-070-Red	Red	CAVITENIA	Ilocos Norte	Ilocos Region	Ilocos Region	Region I	Ilocos Region	0.99999	1e-05	ind3	Indica	0.00911458	0.974039	No deletion	Scanned accession	12.4239	6.19223	2.51262	2.27826	49.2652	16.9968	22.0562	19.8798	135.022	17.3278
132	PTRV22	PRRI003249	4008	5-070-Red	Red	SARUJAO	Benguet	Cordillera Administrative Region	CAR	CAR	CAR	0.99999	1e-05	ind3	Indica	0.00976562	0.972185	No deletion	Scanned accession	12.732	6.24582	2.52849	2.30667	48.9965	16.7427	19.9703	19.8755	133.682	16.5192
133	PTRV220	PRRI000222	2205	7-080-Purple	Purple	TAPOLE	Davao Del Norte	Davao Region	Davao Region	Region XI	Mindanao3	1e-05	0.99999	trop1	japonica	0.00781759	0.977729	No deletion	Scanned accession	13.8263	6.85313	2.58803	2.50776	30.0202	3.0331	0.853192	8.46113	184.451	1.38246
134	PTRV221	PRRI000223	2206	5-070-Red	Red	TAAL 1	Batangas	Calabarzon	Calabarzon	Region IVA	Calabarzon	1e-05	0.99999	trop1	japonica	0.00912052	0.974016	No deletion	Scanned accession	12.1691	5.93224	2.57811	2.23777	60.6256	15.3572	26.2658	30.0381	140.361	25.3459
135	PTRV222	PRRI000227	2210	5-070-Red	Red	EMMANG	Benguet	Cordillera Administrative Region	CAR	CAR	CAR	0.99999	1e-05	ind3	Indica	0.00977199	0.97216	No deletion	Scanned accession	11.8566	6.18429	2.37369	2.34541	52.4833	16.346	23.6436	22.3063	137.152	19.1412
136	PTRV223	PRRI000239	2222	5-070-Red	Red	KALABAO	Nueva Ecija	Central Luzon	Central Luzon	Region III	Central Luzon	0.99999	1e-05	ind3	Indica	0.00522876	0.985119	No deletion	Scanned accession	10.2119	5.70201	2.21491	2.32272	58.6112	14.3949	24.4188	27.8746	140.373	22.3785
137	PTRV224	PRRI000243	2226	5-070-Red	Red	MAGUETAY	Nueva Ecija	Central Luzon	Central Luzon	Region III	Central Luzon	0.99999	1e-05	ind3	Indica	0.00978474	0.972139	No deletion	Scanned accession	12.7773	6.27956	2.51659	2.26648	50.8271	17.5029	25.8879	20.9069	136.931	19.6374
138	PTRV225	PRRI000257	2240	5-070-Red	Red	BENGALA	Ilocos Norte	Ilocos Region	Ilocos Region	Region I	Ilocos Region	0.99999	1e-05	ind3	Indica	0.00977199	0.972162	No deletion	Scanned accession	12.2172	6.02301	2.51533	2.2845	49.1391	18.0592	21.3881	20.0647	133.442	17.8267
139	PTRV226	PRRI000262	2245	5-070-Red	Red	BINORNIG	La Union	Ilocos Region	Ilocos Region	Region I	Ilocos Region	0.99999	1e-05	ind3	Indica	0.00781759	0.977729	No deletion	Scanned accession	12.7905	6.13666	2.58407	2.27828	51.7565	16.6525	22.6103	21.9021	135.994	18.7947
140	PTRV227	PRRI000271	2254	5-070-Red	Red	BUMARO	La Union	Ilocos Region	Ilocos Region	Region I	Ilocos Region	0.99999	1e-05	ind3	Indica	0.00977836	0.972142	No deletion	Scanned accession	14.6597	6.92656	2.57613	2.38069	59.9016	16.8992	27.627	29.2873	139.451	26.388
141	PTRV228	PRRI000274	2257	5-070-Red	Red	CAVITEÑA	Ilocos Norte	Ilocos Region	Ilocos Region	Region I	Ilocos Region	0.99999	1e-05	ind3	Indica	0.00846906	0.975872	No deletion	Scanned accession	11.1379	5.86674	2.39552	2.30571	50.7573	17.7004	24.011	21.0779	135.846	19.2136
142	PTRV229	PRRI000292	2275	5-070-Red	Red	INUWAK	Quezon	Calabarzon	Calabarzon	Region IVA	Calabarzon	0.962126	0.037874	ind3	Indica	0.0325521	0.907283	No deletion	Scanned accession	11.2301	6.20612	2.24865	2.40179	52.8535	17.9839	27.6023	22.7784	137.727	22.126
143	PTRV230	PRRI000293	2276	5-070-Red	Red	ISLA	Ilocos Sur	Ilocos Region	Ilocos Region	Region I	Ilocos Region	0.99999	1e-05	ind3	Indica	0.00848564	0.975824	No deletion	Scanned accession	13.4531	7.0516	2.31613	2.53692	50.2647	17.7708	23.0555	20.6726	134.953	18.5371
144	PTRV231	PRRI000295	2278	5-070-Red	Red	KALLONG BUWAN	La Union	Ilocos Region	Ilocos Region	Region I	Ilocos Region	0.99999	1e-05	ind3	Indica	0.0104371	0.970269	No deletion	Scanned accession	14.4789	6.77176	2.61185	2.43528	59.1057	15.55	27.0873	28.3043	140.506	24.7044
145	PTRV233	PRRI000298	2281	5-070-Red	Red	KINASTILA	Ilocos Sur	Ilocos Region	Ilocos Region	Region I	Ilocos Region	0.99999	1e-05	ind3	Indica	0.00979112	0.9721	Deletion	Scanned accession	13.604	6.95832	2.3717	2.47558	47.3484	16.0506	20.5088	18.372	134.678	15.0995
146	PTRV235	PRRI000301	2284	mix(red and white)	mix (red and white)	LIMANGCA	La Union	Ilocos Region	Ilocos Region	Region I	Ilocos Region	0.99999	1e-05	ind3	Indica	0.00920447	0.973758	No deletion	Scanned accession	12.0188	6.04139	2.47491	2.24482	53.1157	18.671	26.3477	23.0887	136.302	22.1514
147	PTRV238	PRRI000322	2305	5-070-Red	Red	MOTIT MOTIT	Ilocos Norte	Ilocos Region	Ilocos Region	Region I	Ilocos Region	0.984116	0.015884	ind3	Indica	0.0169381	0.951748	No deletion	Scanned accession	11.6121	6.27956	2.27247	2.43594	54.8808	17.0802	27.548	24.4797	138.6	23.0653
148	PTRV239	PRRI000339	2322	5-070-Red	Red	RAGI-OS	Romblon	Mimaropa	Mimaropa	Region IVB	Mimaropa	0.99999	1e-05	ind1B	Indica	0.00589005	0.983224	No deletion	Scanned accession	11.9027	5.58095	2.65551	2.11697	62.0626	14.3275	28.8832	31.05	142.87	26.8039
149	PTRV24	PRRI003261	4021	5-070-Red	Red	WAGWAG RAOIS	Ilocos Sur	Ilocos Region	Ilocos Region	Region I	Ilocos Region	0.99999	1e-05	ind1B	Indica	0.00979112	0.972124	No deletion	Scanned accession	13.4455	6.43635	2.57017	2.29994	58.3889	17.1616	28.2837	27.618	139.475	25.447
150	PTRV240	PRRI000343	2326	5-070-Red	Red	SABINTAR	Ilocos Norte	Ilocos Region	Ilocos Region	Region I	Ilocos Region	0.99999	1e-05	ind3	Indica	0.0352711	0.899474	No deletion	Scanned accession	12.1215	6.42841	2.32804	2.38359	52.3611	17.5712	23.203	22.6092	135.56	20.0813
151	PTRV241	PRRI000356	2339	5-070-Red	Red	SAYGOROT	La Union	Ilocos Region	Ilocos Region	Region I	Ilocos Region	0.99999	1e-05	ind3	Indica	0.00912647	0.973996	double bands	Scanned accession	14.1895	6.94641	2.49475	2.42453	61.6268	13.6022	24.2937	30.6048	141.754	23.0543
152	PTRV242	PRRI000361	2344	5-070-Red	Red	TADIOK	Ilocos Norte	Ilocos Region	Ilocos Region	Region I	Ilocos Region	0.99999	1e-05	ind3	Indica	0.00980392	0.972068	No deletion	Scanned accession	13.4429	6.55741	2.55033	2.34865	53.5196	19.5377	28.4154	23.5633	136.801	23.8267
153	PTRV243	PRRI000363	2346	5-070-Red	Red	TODYOK	Ilocos Norte	Ilocos Region	Ilocos Region	Region I	Ilocos Region	0.99999	1e-05	ind3	Indica	0.0104371	0.970269	No deletion	Scanned accession	12.2663	6.30734	2.4372	2.37985	57.3223	16.6301	28.0641	26.8502	139.652	24.8579
154	PTRV244	PRRI000365	2348	5-070-Red	Red	TUF (GALLANO)	Ilocos Norte	Ilocos Region	Ilocos Region	Region I	Ilocos Region	0.99999	1e-05	ind3	Indica	0.00848564	0.975823	No deletion	Scanned accession	13.843	6.44032	2.6833	2.22584	54.7621	18.6528	28.319	24.6067	137.586	24.2136
155	PTRV245	PRRI000374	2357	5-070-Red	Red	IKAT	Isabela	Cagayan Valley	Cagayan Valley	Region II	Cagayan Valley	1e-05	0.99999	trop1	japonica	0.0110677	0.968476	No deletion	Scanned accession	12.511	6.61894	2.3598	2.50048	60.4877	12.9955	22.5685	29.784	140.915	21.9738
156	PTRV249	PRRI000386	2369	5-070-Red	Red	COTSIYAM	Zamboanga del Norte	Zamboanga Peninsula	Zamboanga Peninsula	Region IX	Mindanao1	1e-05	0.99999	trop1	japonica	0.0104849	0.970085	No deletion	Scanned accession	14.468	7.35327	2.45109	2.55894	60.7757	13.1783	19.8941	30.3994	139.157	20.8189
157	PTRV252	PRRI000389	2372	6-088-Variable purple	Variable purple	PALAGADAN	Metropolitan Manila	National Capital Region	NCR	NCR	NCR	0.969769	0.030231	ind3	Indica	0.00849118	0.975825	No deletion	Scanned accession	9.91893	5.40232	2.30621	2.21099	38.1832	11.6029	11.2604	12.5788	125.358	7.19265
158	PTRV253	PRRI000390	2373	6-088-Variable purple	Variable purple	PALAGADAN	Camarines Sur	Bicol Region	Bicol Region	Region V	Bicol Region	0.884672	0.115328	ind3	Indica	0.00913242	0.973996	No deletion	Scanned accession	12.2429	6.22597	2.42926	2.37398	31.8116	4.84432	2.76328	9.22252	164.194	1.66834
159	PTRV254	PRRI000391	2374	5-070-Red	Red	SABLAY	Albay	Bicol Region	Bicol Region	Region V	Bicol Region	0.99999	1e-05	ind3	Indica	0.00848564	0.975844	No deletion	Scanned accession	11.1357	6.33021	2.22285	2.50838	58.8156	15.5465	23.8376	28.4395	138.597	23.2843
160	PTRV255	PRRI000394	2377	5-070-Red	Red	BANGKORO	Benguet	Cordillera Administrative Region	CAR	CAR	CAR	0.99999	1e-05	ind3	Indica	0.00912052	0.974015	No deletion	Scanned accession	14.1111	6.74397	2.5801	2.33306	50.4245	15.7067	21.5429	20.7604	136.054	17.1721
161	PTRV257	PRRI000403	2386	5-070-Red	Red	SALANAY (GOPANG)	Benguet	Cordillera Administrative Region	CAR	CAR	CAR	0.99999	1e-05	ind3	Indica	0.00718016	0.979541	No deletion	Scanned accession	11.1238	5.66033	2.46895	2.22664	48.3901	16.2961	21.2704	19.0605	135.083	15.9433
162	PTRV258	PRRI000408	2391	5-070-Red	Red	BINUTUEN	Pangasinan	Ilocos Region	Ilocos Region	Region I	Ilocos Region	0.99999	1e-05	ind3	Indica	0.00846906	0.975879	Deletion	Scanned accession	13.6551	6.60703	2.58407	2.33956	53.8922	15.0353	20.1356	23.7719	135.983	18.2911
163	PTRV259	PRRI000411	351 / 2394	5-070-Red	Red	IMANG-IMANG	Pangasinan	Ilocos Region	Ilocos Region	Region I	Ilocos Region	0.99999	1e-05	ind3	Indica	0.0080591	0.976955	No deletion	NA	NA	NA	NA	NA	NA	NA	NA	NA	NA	NA
164	PTRV260	PRRI000415	2398	5-070-Red	Red	BANSOROY	Cagayan	Cagayan Valley	Cagayan Valley	Region II	Cagayan Valley	0.99999	1e-05	ind3	Indica	0.0078329	0.977683	No deletion	Scanned accession	13.2891	6.34505	2.62376	2.23592	60.8588	14.2896	24.9479	30.3086	140.589	24.6733
165	PTRV261	PRRI000422	2405	5-070-Red	Red	INANIBONG	Palawan	Mimaropa	Mimaropa	Region IVB	Mimaropa	1e-05	0.99999	trop1	japonica	0.00977199	0.972167	No deletion	Scanned accession	12.9156	6.78168	2.33201	2.43997	58.3961	16.8392	26.879	27.9768	138.907	25.3398
166	PTRV262	PRRI000423	2406	5-070-Red	Red	INIRAAN	Palawan	Mimaropa	Mimaropa	Region IVB	Mimaropa	1e-05	0.99999	trop1	japonica	0.00977836	0.972143	No deletion	Scanned accession	10.3839	6.7763	1.8486	2.93647	56.2101	15.7885	24.5835	25.818	138.625	22.0788
167	PTRV263	PRRI000425	2408	5-070-Red	Red	LUDAN	Palawan	Mimaropa	Mimaropa	Region IVB	Mimaropa	0.021362	0.978638	trop1	japonica	0.0162866	0.9536	No deletion	Scanned accession	13.4689	6.79709	2.50449	2.47061	60.1596	17.0618	27.3701	29.521	139.306	26.3705
168	PTRV264	PRRI000433	2416	5-070-Red	Red	GUINAYANGANG	Nueva Ecija	Central Luzon	Central Luzon	Region III	Central Luzon	0.536459	0.463541	admix	admix	0.273386	0.221841	No deletion	Scanned accession	11.5691	6.73802	2.13553	2.57666	60.3567	14.6156	23.6443	29.874	139.746	23.5139
169	PTRV265	PRRI000458	2441	5-070-Red	Red	WARAY-WARAY	Ilocos Sur	Ilocos Region	Ilocos Region	Region I	Ilocos Region	0.99999	1e-05	ind3	Indica	0.0110966	0.96837	No deletion	Scanned accession	13.9205	6.63283	2.592	2.31671	46.4091	16.6133	19.9857	17.796	133.318	14.9559
170	PTRV266	PRRI000459	2442	5-070-Red	Red	ALLILIK	Isabela	Cagayan Valley	Cagayan Valley	Region II	Cagayan Valley	1e-05	0.99999	trop1	japonica	0.00846906	0.975875	No deletion	Scanned accession	14.6664	6.3252	2.95719	2.18004	52.4497	12.958	19.4206	22.0752	138.296	15.5101
171	PTRV268	PRRI000462	2445	5-070-Red	Red	TONING	Benguet	Cordillera Administrative Region	CAR	CAR	CAR	0.99999	1e-05	ind3	Indica	0.00977836	0.972137	No deletion	Scanned accession	15.9788	7.48625	2.61979	2.55824	48.2512	13.2898	18.5684	18.7792	136.558	13.4169
172	PTRV273	PRRI000504	2487	5-070-Red	Red	KALINDOL (BULUHAN)	Metropolitan Manila	National Capital Region	NCR	NCR	NCR	0.99999	1e-05	indx	Indica	0.0111111	0.968356	No deletion	Scanned accession	12.283	5.97987	2.55429	2.20864	57.6618	16.9418	27.2294	27.1488	139.209	24.5678
173	PTRV275	PRRI000519	2502	5-070-Red	Red	RED LUMINOS	Ilocos Norte	Ilocos Region	Ilocos Region	Region I	Ilocos Region	0.99999	1e-05	ind3	Indica	0.008519	0.975722	No deletion	Scanned accession	14.0081	6.83328	2.53842	2.43741	50.2294	15.9263	21.5015	20.5055	135.779	16.9383
174	PTRV283	PRRI000538	2521	5-070-Red	Red	IMPUHA	Nueva Ecija	Central Luzon	Central Luzon	Region III	Central Luzon	0.278097	0.721903	temp	admix	0.00196335	0.994408	No deletion	Scanned accession	13.7396	5.92033	2.84406	2.08631	53.8427	14.3469	22.5292	23.2957	139.077	18.3414
175	PTRV285	PRRI000547	2530	5-070-Red	Red	TUKON-TUKOD	Ilocos Norte	Ilocos Region	Ilocos Region	Region I	Ilocos Region	0.99999	1e-05	ind3	Indica	0.00851343	0.975753	No deletion	Scanned accession	15.9072	7.34136	2.63368	2.46496	52.4295	14.3729	20.375	22.2618	137.009	16.9695
176	PTRV286	PRRI000548	2531	5-070-Red	Red	KATIBONG	Agusan Del Norte	Caraga	Caraga	Region XIII	Mindanao3	0.997671	0.002329	ind3	Indica	0.00784314	0.97766	Deletion	Scanned accession	10.568	6.17437	2.10972	2.53068	57.679	12.5231	24.7599	26.5903	142.596	20.8739
177	PTRV288	PRRI000551	2534	5-070-Red	Red	SALANAY (SABBOL)	Benguet	Cordillera Administrative Region	CAR	CAR	CAR	1e-05	0.99999	trop1	japonica	0.0104167	0.97033	No deletion	Scanned accession	13.0402	5.73972	2.90162	2.09932	61.134	15.4922	26.9875	30.2249	140.969	25.6121
178	PTRV29	PRRI003288	4057	5-070-Red	Red	KUTSIYAM	Bohol	Central Visayas	Central Visayas	Region VII	Visayas	0.99999	1e-05	ind3	Indica	0.00716146	0.979602	No deletion	Scanned accession	12.6591	6.28749	2.49674	2.28569	58.2939	16.1599	30.6529	27.0982	141.615	25.4743
179	PTRV291	PRRI000559	2542	5-070-Red	Red	EPIS (KINTOMAN)	Benguet	Cordillera Administrative Region	CAR	CAR	CAR	0.976492	0.023508	ind3	Indica	0.00977199	0.972164	No deletion	Scanned accession	14.0185	6.6368	2.60391	2.32814	56.3861	14.4188	24.8968	25.6378	140.259	21.2801
180	PTRV292	PRRI000563	2546	5-070-Red	Red	AMBUL	Ilocos Norte	Ilocos Region	Ilocos Region	Region I	Ilocos Region	0.99999	1e-05	ind3	Indica	0.00911458	0.974039	Deletion	Scanned accession	12.3883	6.15651	2.51659	2.29094	57.7925	16.4292	26.7706	27.3159	139.367	24.4367
181	PTRV294	PRRI000589	1383	5-070-Red	Red	GININTO	Camarines Sur	Bicol Region	Bicol Region	Region V	Bicol Region	1e-05	0.99999	trop1	japonica	0.00586701	0.983286	No deletion	Scanned accession	10.8291	5.20782	2.65154	2.0416	62.3333	12.7582	22.4076	31.6675	141.634	22.5537
182	PTRV296	PRRI000601	1400	5-070-Red	Red	KINALANSING	Quezon	Calabarzon	Calabarzon	Region IVA	Calabarzon	1e-05	0.99999	trop1	japonica	0.00723208	0.97938	Deletion	Scanned accession	14.0192	6.85313	2.61582	2.42254	67.8125	12.3587	23.0304	38.2239	142.563	26.3123
183	PTRV3	PRRI003116	3859	5-070-Red	Red	CAMORRUS	Antique	Western Visayas	Western Visayas	Region VI	Visayas	0.99999	1e-05	ind3	Indica	0.00782269	0.977725	No deletion	Scanned accession	10.6877	5.98781	2.22484	2.39819	57.6367	16.4105	26.8921	26.989	139.382	24.1086
184	PTRV302	PRRI000626	1435	mix(red and white)	mix (red and white)	PINILIK	Quezon	Calabarzon	Calabarzon	Region IVA	Calabarzon	1e-05	0.99999	trop1	japonica	0.00846906	0.975875	Deletion	NA	NA	NA	NA	NA	NA	NA	NA	NA	NA	NA
185	PTRV305	PRRI000642	1465	5-070-Red	Red	INUMAY	North Cotabato	Soccsksargen	Soccsksargen	Region XII	Mindanao2	0.99999	1e-05	ind1B	Indica	0.0653595	0.814004	Deletion	NA	NA	NA	NA	NA	NA	NA	NA	NA	NA	NA
186	PTRV307	PRRI000644	1467	5-070-Red	Red	HANDURAYAN	North Cotabato	Soccsksargen	Soccsksargen	Region XII	Mindanao2	0.99999	1e-05	ind3	Indica	0.0078534	0.977652	No deletion	Scanned accession	9.26324	4.97958	2.3717	2.18701	51.5667	16.8724	23.8786	21.8763	136.399	19.7204
187	PTRV308	PRRI000670	1529	5-070-Red	Red	MITAO	Occidental Mindoro	Mimaropa	Mimaropa	Region IVB	Mimaropa	0.99999	1e-05	indx	Indica	0.0117264	0.96661	No deletion	Scanned accession	10.9885	5.88063	2.31812	2.2649	54.256	16.6666	25.2108	23.9052	137.812	21.2615
188	PTRV311	PRRI000741	1508	6-088-Variable purple	Variable purple	TININTA	Occidental Mindoro	Mimaropa	Mimaropa	Region IVB	Mimaropa	1e-05	0.99999	trop1	japonica	0.00782269	0.977712	No deletion	Scanned accession	13.7702	6.95237	2.50269	2.49219	34.3634	7.13702	5.89319	10.4561	152.779	3.35302
189	PTRV313	PRRI000816	1137-A	5-070-Red	Red	KABUAK	North Cotabato	Soccsksargen	Soccsksargen	Region XII	Mindanao2	0.062056	0.937944	trop1	japonica	0.00979752	0.97209	No deletion	NA	NA	NA	NA	NA	NA	NA	NA	NA	NA	NA
190	PTRV314	PRRI000815	1132	5-070-Red	Red	RED TONNER	North Cotabato	Soccsksargen	Soccsksargen	Region XII	Mindanao2	0.99999	1e-05	indx	Indica	0.00718485	0.979542	Deletion	Scanned accession	11.0271	5.69606	2.4372	2.21909	57.8033	16.3265	27.1436	26.969	139.776	24.031
191	PTRV316	PRRI000887	1387	7-080-Purple	Purple	ROTONG SUMA - OY	Camarines Sur	Bicol Region	Bicol Region	Region V	Bicol Region	0.99999	1e-05	ind1B	Indica	0.115385	0.671497	Deletion	Scanned accession	14.0229	6.54749	2.71505	2.32558	37.2551	7.82048	6.51848	12.1041	135.761	4.496
192	PTRV317	PRRI000897	1432	mix(red and white)	mix (red and white)	DINULYAS	Quezon	Calabarzon	Calabarzon	Region IVA	Calabarzon	0.99999	1e-05	ind1B	Indica	0.00721311	0.979473	Deletion	Scanned accession	15.242	7.33144	2.64956	2.44803	61.9511	14.1884	23.692	31.3608	140.64	23.9011
193	PTRV318	PRRI000899	1439	5-070-Red	Red	NAGSALAY	Quezon	Calabarzon	Calabarzon	Region IVA	Calabarzon	1e-05	0.99999	trop1	japonica	0.00849118	0.975817	No deletion	Scanned accession	11.8237	6.26566	2.3598	2.38204	57.6008	18.4271	31.5237	26.7457	139.677	26.8824
194	PTRV319	PRRI000903	1471	5-070-Red	Red	UNKNOWN	North Cotabato	Soccsksargen	Soccsksargen	Region XII	Mindanao2	0.985032	0.014968	indx	Indica	0.0085639	0.975605	No deletion	Scanned accession	11.1766	6.3907	2.13354	2.55695	53.4263	15.3097	22.932	23.1075	137.896	19.0652
195	PTRV32	PRRI003325	4096	5-070-Red	Red	KAMOROS	Aklan	Western Visayas	Western Visayas	Region VI	Visayas	0.99999	1e-05	indx	Indica	0.00718485	0.979523	No deletion	Scanned accession	10.654	5.73377	2.3201	2.25968	56.7255	15.3719	26.473	26.0464	140.2	22.7356
196	PTRV322	PRRI000923	1522	5-070-Red	Red	BINIBE	Occidental Mindoro	Mimaropa	Mimaropa	Region IVB	Mimaropa	1e-05	0.99999	trop1	japonica	0.0065189	0.981423	No deletion	Scanned accession	8.01577	4.29487	2.3717	2.01018	56.7576	14.9532	25.2296	25.889	140.104	21.611
197	PTRV324	PRRI001012	1358	5-070-Red	Red	DILAY	Abra	Cordillera Administrative Region	CAR	CAR	CAR	0.99999	1e-05	ind3	Indica	0.0163292	0.953482	No deletion	Scanned accession	15.6023	7.26595	2.60391	2.43867	51.4162	16.7247	22.2961	21.614	135.742	18.4596
198	PTRV328	PRRI001757	208	5-070-Red	Red	AWOT	South Cotabato	Soccsksargen	Soccsksargen	Region XII	Mindanao2	1e-05	0.99999	trop1	japonica	0.00782779	0.977696	No deletion	Scanned accession	12.0278	5.56308	2.74086	2.05703	61.1227	12.5887	21.0698	30.6625	140.626	21.359
199	PTRV330	PRRI001776	141	5-070-Red	Red	TADYOK	Cagayan	Cagayan Valley	Cagayan Valley	Region II	Cagayan Valley	0.99999	1e-05	ind3	Indica	0.00918635	0.973832	No deletion	NA	NA	NA	NA	NA	NA	NA	NA	NA	NA	NA
200	PTRV331	PRRI001780	170	5-070-Red	Red	BULUHAN (B)	Batangas	Calabarzon	Calabarzon	Region IVA	Calabarzon	0.99999	1e-05	indx	Indica	0.0104235	0.970321	No deletion	Scanned accession	12.6424	6.1704	2.51262	2.2811	56.1875	17.0367	26.7388	25.5685	138.616	23.1814
201	PTRV332	PRRI001784	185	5-070-Red	Red	BULUHAN (C)	Batangas	Calabarzon	Calabarzon	Region IVA	Calabarzon	0.868052	0.131948	indx	Indica	0.0104235	0.970303	No deletion	Scanned accession	15.0087	7.18854	2.56025	2.42932	63.1493	13.0271	25.1338	32.2847	142.919	24.4509
202	PTRV333	PRRI001785	186	5-070-Red	Red	KINANDA	Batangas	Calabarzon	Calabarzon	Region IVA	Calabarzon	1e-05	0.99999	trop1	japonica	0.00781759	0.977728	No deletion	Scanned accession	15.6781	6.60306	3.02467	2.18724	61.4921	11.8846	20.7712	30.7878	141.714	20.3975
203	PTRV335	PRRI001799	286	5-070-Red	Red	SANG-LAYA	Ilocos Norte	Ilocos Region	Ilocos Region	Region I	Ilocos Region	0.99999	1e-05	indx	Indica	0.0123859	0.964726	No deletion	Scanned accession	12.7774	5.90842	2.69124	2.09347	63.4273	16.6358	28.6125	33.07	140.467	29.4574
204	PTRV34	PRRI003352	4127	5-070-Red	Red	LUBANG	Agusan del Sur	Caraga	Caraga	Region XIII	Mindanao3	0.981844	0.018156	indx	Indica	0.00522534	0.985107	Deletion	Scanned accession	11.4114	5.65835	2.52651	2.15765	57.1395	15.7868	24.5003	26.7965	138.645	22.8213
205	PTRV342	PRRI001890	223-A	5-070-Red	Red	PINDINGA (B)	Palawan	Mimaropa	Mimaropa	Region IVB	Mimaropa	0.973975	0.026025	ind2	Indica	0.0066357	0.981065	No deletion	Scanned accession	13.4519	5.8985	2.86192	2.12139	47.5155	13.9181	18.8715	18.1952	135.924	13.3605
206	PTRV343	PRRI001920	169-B	5-070-Red	Red	BULUHAN (A)	Batangas	Calabarzon	Calabarzon	Region IVA	Calabarzon	1e-05	0.99999	trop1	japonica	0.00977199	0.972159	No deletion	Scanned accession	15.6578	6.97817	2.79246	2.35387	63.9281	15.9503	28.3087	33.6524	140.9	29.4627
207	PTRV344	PRRI001932	3203	5-070-Red	Red	MIMIS	Cagayan	Cagayan Valley	Cagayan Valley	Region II	Cagayan Valley	0.562354	0.437646	admix	admix	0.216216	0.383635	Ambiguous	Scanned accession	12.7756	7.22625	2.15934	2.71068	50.992	17.6181	24.8986	21.1867	136.477	19.5102
208	PTRV345	PRRI001946	3218	5-070-Red	Red	ALINDAYO	Cagayan	Cagayan Valley	Cagayan Valley	Region II	Cagayan Valley	1e-05	0.99999	trop1	japonica	0.00846354	0.975894	No deletion	Scanned accession	14.3473	6.57527	2.76864	2.25701	60.7463	13.3498	21.9034	30.083	140.228	21.8093
209	PTRV347	PRRI002170	182	1-010-White	White	BINIRHEN (B)	Batangas	Calabarzon	Calabarzon	Region IVA	Calabarzon	0.99999	1e-05	ind3	Indica	0.0105541	0.969901	Deletion	NA	NA	NA	NA	NA	NA	NA	NA	NA	NA	NA
210	PTRV348	PRRI002267	1216	5-070-Red	Red	MALAGKIT (INAKU-NENENG) / DINAKOT	Batangas	Calabarzon	Calabarzon	Region IVA	Calabarzon	0.99999	1e-05	indx	Indica	0.0104371	0.970287	No deletion	Scanned accession	13.1693	6.07315	2.67735	2.1258	59.6169	17.0263	26.8165	29.1413	139.088	25.9465
211	PTRV349	PRRI002311	1371	5-070-Red	Red	SANIP	Abra	Cordillera Administrative Region	CAR	CAR	CAR	0.99999	1e-05	ind3	Indica	0.0625815	0.821666	No deletion	NA	NA	NA	NA	NA	NA	NA	NA	NA	NA	NA
212	PTRV35	PRRI003356	4131	5-070-Red	Red	MACARATO	Metropolitan Manila	National Capital Region	NCR	NCR	NCR	1e-05	0.99999	trop1	japonica	0.00716612	0.979587	No deletion	Scanned accession	8.73266	5.15821	2.1256	2.18642	53.0913	10.6482	21.1919	22.2247	142.377	15.4628
213	PTRV351	PRRI002472	3879	6-088-Variable purple	Variable purple	BALLATINAO	Ifugao	Cordillera Administrative Region	CAR	CAR	CAR	1e-05	0.99999	trop1	japonica	0.00911458	0.974039	No deletion	Scanned accession	12.1653	5.77545	2.74086	2.19779	37.7321	12.9889	11.9305	12.4967	125.874	7.97806
214	PTRV352	PRRI002485	3880	5-070-Red	Red	BANING	Basilan	Autonomous Region in Muslim Mindanao	ARMM	ARMM	Mindanao1	1e-05	0.99999	trop1	japonica	0.00911458	0.974039	No deletion	Scanned accession	12.3237	6.85512	2.23079	2.58204	62.2455	12.6414	21.8766	31.6485	141.323	22.051
215	PTRV353	PRRI002600	787	5-070-Red	Red	KARUMBA	Eastern Samar	Eastern Visayas	Eastern Visayas	Region VIII	Visayas	1e-05	0.99999	trop1	japonica	0.00716146	0.979602	No deletion	Scanned accession	11.5764	6.03147	2.35186	2.30524	56.5782	15.6022	24.328	26.0391	138.683	21.7832
216	PTRV354	PRRI002730	1133	5-070-Red	Red	KUA KUA	North Cotabato	Soccsksargen	Soccsksargen	Region XII	Mindanao2	1e-05	0.99999	trop1	japonica	0.0078125	0.977748	No deletion	NA	NA	NA	NA	NA	NA	NA	NA	NA	NA	NA
217	PTRV36	PRRI003391	4174	5-070-Red	Red	TAPLIAC	Metropolitan Manila	National Capital Region	NCR	NCR	NCR	0.99999	1e-05	ind3	Indica	0.00652316	0.981422	No deletion	NA	NA	NA	NA	NA	NA	NA	NA	NA	NA	NA
218	PTRV362	PRRI003047	3783	5-070-Red	Red	MALAGKIT	Palawan	Mimaropa	Mimaropa	Region IVB	Mimaropa	1e-05	0.99999	trop1	japonica	0.00716612	0.979591	No deletion	Scanned accession	13.5517	7.82364	2.2427	2.89433	63.6979	16.8379	31.4371	31.1154	148.513	28.5133
219	PTRV363	PRRI003065	3801	5-070-Red	Red	PINALUNGPUNG 1	Palawan	Mimaropa	Mimaropa	Region IVB	Mimaropa	1e-05	0.99999	trop1	japonica	0.00651466	0.98144	No deletion	NA	NA	NA	NA	NA	NA	NA	NA	NA	NA	NA
220	PTRV364	PRRI003068	3804	5-070-Red	Red	PINDINGA 1	Palawan	Mimaropa	Mimaropa	Region IVB	Mimaropa	1e-05	0.99999	trop1	japonica	0.00846354	0.975894	Ambiguous	Scanned accession	13.5419	6.18826	2.70513	2.18903	58.5837	12.7853	21.3922	27.8219	140.379	19.838
221	PTRV368	-	6070	5-070-Red	Red	IMON-IMON	Ilocos Norte	Ilocos Region	Ilocos Region	Region I	Ilocos Region	1e-05	0.99999	trop1	japonica	0.00587084	0.983279	No deletion	NA	NA	NA	NA	NA	NA	NA	NA	NA	NA	NA
222	PTRV369	-	6073	5-070-Red	Red	INIRAAN*	Palawan	Mimaropa	Mimaropa	Region IVB	Mimaropa	0.021979	0.978021	trop1	japonica	0.00847458	0.975853	No deletion	Scanned accession	11.3133	7.03175	1.98667	2.8586	52.1516	16.95	24.659	21.9787	137.141	19.5322
223	PTRV371	-	7761	5-070-Red	Red	GINATAAN	Lanao del Sur	Autonomous Region in Muslim Mindanao	ARMM	ARMM	Mindanao1	1e-05	0.99999	trop1	japonica	0.00912647	0.973999	NA	Scanned accession	12.2688	6.30734	2.41537	2.36232	54.4638	12.3705	19.9866	23.7217	139.782	16.4104
224	PTRV372	-	7762	6-088-Variable purple	Variable purple	KOTONG (PILIT)	Lanao del Sur	Autonomous Region in Muslim Mindanao	ARMM	ARMM	Mindanao1	1e-05	0.99999	trop1	japonica	0.00855263	0.975613	No deletion	NA	NA	NA	NA	NA	NA	NA	NA	NA	NA	NA
225	PTRV377	-	10835	7-080-Purple	Purple	GALO (MALAGKIT)	Aurora	Central Luzon	Central Luzon	Region III	Central Luzon	1e-05	0.99999	trop1	japonica	0.00977199	0.97216	No deletion	Scanned accession	13.3476	6.41848	2.61582	2.28415	39.8153	9.61083	11.011	13.1684	130.397	6.30803
226	PTRV378	-	10837	5-070-Red	Red	KIPIL	Aurora	Central Luzon	Central Luzon	Region III	Central Luzon	1e-05	0.99999	trop1	japonica	0.0104371	0.970259	No deletion	Scanned accession	14.243	6.89481	2.69521	2.41533	65.3274	14.1224	24.8864	35.1491	141.445	26.7634
227	PTRV380	-	10862	6-088-Variable purple	Variable purple	GALO	Aurora	Central Luzon	Central Luzon	Region III	Central Luzon	1e-05	0.99999	trop1	japonica	0.00911458	0.974039	No deletion	Scanned accession	12.3182	7	2.18117	2.60939	47.2189	14.1831	20.2871	17.9962	136.584	13.9905
228	PTRV385	PRRI006354	11182-A	5-070-Red	Red	PAYAGO	Kalinga	Cordillera Administrative Region	CAR	CAR	CAR	1e-05	0.99999	trop1	japonica	0.00846354	0.975894	NA	Scanned accession	14.2847	6.65665	2.69322	2.3428	56.6801	18.2415	28.902	26.226	138.567	25.3529
229	PTRV386	-	11376	5-070-Red	Red	KALOSISI	Bukidnon	Northern Mindanao	Northern Mindanao	Region X	Mindanao1	1e-05	0.99999	trop1	japonica	0.00846906	0.975873	No deletion	Scanned accession	12.5206	6.611	2.35781	2.5127	61.4762	12.5919	22.7861	30.629	142.059	22.0027
230	PTRV387	-	11509	5-070-Red	Red	RED RICE (AROMATIC)	Mountain Province	Cordillera Administrative Region	CAR	CAR	CAR	0.99999	1e-05	ind3	Indica	0.0078125	0.977748	No deletion	Scanned accession	11.2789	5.79926	2.43521	2.23139	53.9367	16.8902	23.716	23.6677	136.732	20.5282
231	PTRV388	-	11520	5-070-Red	Red	LUK-AB	Benguet	Cordillera Administrative Region	CAR	CAR	CAR	0.99999	1e-05	ind3	Indica	0.00913838	0.973948	No deletion	Scanned accession	12.3575	6.38078	2.3975	2.35936	57.9579	14.6634	22.4398	27.4421	138.713	21.3382
232	PTRV389	-	11535	5-070-Red	Red	BOTALGA	Benguet	Cordillera Administrative Region	CAR	CAR	CAR	0.99999	1e-05	ind3	Indica	0.0104644	0.970198	No deletion	NA	NA	NA	NA	NA	NA	NA	NA	NA	NA	NA
233	PTRV391	-	11542	5-070-Red	Red	Talabtab	Benguet	Cordillera Administrative Region	CAR	CAR	CAR	0.99999	1e-05	ind3	Indica	0.0084801	0.975856	No deletion	NA	NA	NA	NA	NA	NA	NA	NA	NA	NA	NA
234	PTRV392	-	11572	5-070-Red	Red	MALAGKIT	Batanes	Cagayan Valley	Cagayan Valley	Region II	Cagayan Valley	1e-05	0.99999	trop1	japonica	0.0104167	0.97033	No deletion	Scanned accession	14.369	6.611	2.76864	2.33978	65.3166	15.518	24.3134	35.6611	139.484	27.9937
235	PTRV4	PRRI003130	3885	5-070-Red	Red	BINALASANG	Ilocos Norte	Ilocos Region	Ilocos Region	Region I	Ilocos Region	0.99999	1e-05	ind3	Indica	0.00850229	0.975775	No deletion	NA	NA	NA	NA	NA	NA	NA	NA	NA	NA	NA
236	PTRV40	PRRI003451	4275	5-070-Red	Red	BINTALAW	Occidental Mindoro	Mimaropa	Mimaropa	Region IVB	Mimaropa	1e-05	0.99999	trop1	japonica	0.0699804	0.800695	No deletion	Scanned accession	13.9724	6.3391	2.77856	2.22172	64.5146	10.0853	21.1517	34.0029	144.349	21.3566
237	PTRV409	-	11926	5-070-Red	Red	DINORADO	North Cotabato	Soccsksargen	Soccsksargen	Region XII	Mindanao2	1e-05	0.99999	trop1	japonica	0.0071708	0.979565	No deletion	NA	NA	NA	NA	NA	NA	NA	NA	NA	NA	NA
238	PTRV410	-	11927	5-070-Red	Red	DINORADO	North Cotabato	Soccsksargen	Soccsksargen	Region XII	Mindanao2	1e-05	0.99999	trop1	japonica	0.0065189	0.981424	No deletion	Scanned accession	12.3615	7.18457	2.07797	2.77414	52.1703	19.1211	29.1853	21.9449	137.396	22.0985
239	PTRV413	-	11964	5-070-Red	Red	RED RICE (PURPLE TIP)	Ilocos Sur	Ilocos Region	Ilocos Region	Region I	Ilocos Region	0.99999	1e-05	ind3	Indica	0.00783801	0.977673	No deletion	Scanned accession	11.1597	6.8571	1.9966	2.75397	59.5506	15.0656	26.4189	28.6893	140.826	24.2431
240	PTRV414	-	11966	7-080-Purple	Purple	BALATINAW	Ilocos Sur	Ilocos Region	Ilocos Region	Region I	Ilocos Region	0.99999	1e-05	indx	Indica	0.00849673	0.975819	Deletion	Scanned accession	12.7459	6.65863	2.33002	2.47716	30.0409	7.41805	1.8134	8.74267	156.874	2.2283
241	PTRV415	-	11967	6-088-Variable purple	Variable purple	BLACK DIKET	Ilocos Sur	Ilocos Region	Ilocos Region	Region I	Ilocos Region	0.99999	1e-05	indx	Indica	0.00912647	0.974002	Deletion	Scanned accession	13.2248	6.58718	2.44514	2.45421	33.6725	8.18258	5.05722	10.2816	146.253	3.55494
242	PTRV433	-	12239	mix(red and white)	mix (red and white)	BINIKOL / PINILIK	Aurora	Central Luzon	Central Luzon	Region III	Central Luzon	1e-05	0.99999	trop1	japonica	0.00846354	0.975894	NA	NA	NA	NA	NA	NA	NA	NA	NA	NA	NA	NA
243	PTRV438	-	12254	6-088-Variable purple	Variable purple	MAREM	Zamboanga del Sur	Zamboanga Peninsula	Zamboanga Peninsula	Region IX	Mindanao1	1e-05	0.99999	trop1	japonica	0.00912647	0.974009	No deletion	Scanned accession	12.3144	6.21208	2.51857	2.39127	31.7528	6.96435	4.39151	9.29085	140.87	2.6852
244	PTRV439	-	12258	7-080-Purple	Purple	PEHETAN PURE	Zamboanga del Sur	Zamboanga Peninsula	Zamboanga Peninsula	Region IX	Mindanao1	1e-05	0.99999	trop1	japonica	0.00586701	0.983282	Deletion	Scanned accession	14.5958	6.41527	2.84283	2.31934	38.9379	7.51545	10.167	12.4825	132.812	4.95012
245	PTRV440	-	12316	5-070-Red	Red	LUBANG KALABAW	Agusan del Sur	Caraga	Caraga	Region XIII	Mindanao3	1e-05	0.99999	trop1	japonica	0.00716146	0.979602	No deletion	Scanned accession	12.5591	5.66033	2.8123	2.13607	57.4662	14.8783	25.6074	26.4337	140.567	22.0291
246	PTRV441	-	12319	5-070-Red	Red	DALAGANG BUKID	Agusan del Sur	Caraga	Caraga	Region XIII	Mindanao3	0.99999	1e-05	indx	Indica	0.00915631	0.973902	No deletion	Scanned accession	13.1719	6.78764	2.35583	2.51494	57.2096	16.8312	27.5873	26.4648	139.472	24.0642
247	PTRV442	-	12321	5-070-Red	Red	RED B10	Agusan del Sur	Caraga	Caraga	Region XIII	Mindanao3	0.99999	1e-05	indx	Indica	0.00587467	0.983265	Deletion	Scanned accession	13.6248	7.64899	2.1514	2.8623	57.335	15.4193	27.584	26.1432	141.05	22.8051
248	PTRV444	-	12332	5-070-Red	Red	SINAMAW	Agusan del Sur	Caraga	Caraga	Region XIII	Mindanao3	1e-05	0.99999	trop1	japonica	0.00521173	0.985156	No deletion	NA	NA	NA	NA	NA	NA	NA	NA	NA	NA	NA
249	PTRV447	-	12348	mix(red and white)	mix (red and white)	SINAMPABLO	Surigao del Sur	Caraga	Caraga	Region XIII	Mindanao3	1e-05	0.99999	trop1	japonica	0.00585938	0.983311	No deletion	NA	NA	NA	NA	NA	NA	NA	NA	NA	NA	NA
250	PTRV448	-	12351	mix(red and variant purple)	mix (red and variant purple)	REMOLITES	Surigao del Sur	Caraga	Caraga	Region XIII	Mindanao3	1e-05	0.99999	trop1	japonica	0.00716612	0.979586	No deletion	NA	NA	NA	NA	NA	NA	NA	NA	NA	NA	NA
251	PTRV449	-	12353	1-010-White	White	DUMAP-OG	Surigao del Sur	Caraga	Caraga	Region XIII	Mindanao3	1e-05	0.99999	trop1	japonica	0.00846354	0.975894	No deletion	Scanned accession	10.1046	6.81939	1.88347	2.93995	61.4017	11.9509	23.1876	30.3983	142.938	21.7382
252	PTRV450	-	12354	6-088-Variable purple	Variable purple	PILIT	Surigao del Sur	Caraga	Caraga	Region XIII	Mindanao3	1e-05	0.99999	trop1	japonica	0.00782269	0.977712	No deletion	Scanned accession	12.1215	5.93224	2.6317	2.24622	49.3484	12.3242	22.0269	19.2286	140.311	14.6678
253	PTRV461	-	12638	5-070-Red	Red	CALINAYAN M	Leyte	Eastern Visayas	Eastern Visayas	Region VIII	Visayas	0.598673	0.401327	admix	admix	0.546969	-0.561231	No deletion	NA	NA	NA	NA	NA	NA	NA	NA	NA	NA	NA
254	PTRV462	-	12640	6-088-Variable purple	Variable purple	MALAGAYA	Negros Occidental	Western Visayas	Western Visayas	Region VI	Visayas	1e-05	0.99999	trop1	japonica	0.00390625	0.988874	No deletion	Scanned accession	12.7028	5.48719	2.77667	1.99885	41.1158	9.36708	11.2078	14.4294	130.91	7.14988
255	PTRV466	-	12659	5-070-Red	Red	KINAMPANYA	Zambales	Central Luzon	Central Luzon	Region III	Central Luzon	1e-05	0.99999	trop1	japonica	0.00716612	0.979583	No deletion	Scanned accession	14.9645	7.00397	2.65948	2.34711	58.3633	15.1735	24.3037	27.6691	139.4	22.5021
256	PTRV470	-	12675	5-070-Red	Red	PULANG BALAT	Bulacan	Central Luzon	Central Luzon	Region III	Central Luzon	1e-05	0.99999	trop1	japonica	0.0104167	0.97033	No deletion	NA	NA	NA	NA	NA	NA	NA	NA	NA	NA	NA
257	PTRV473	-	12678	5-070-Red	Red	BRILLANTE	Bulacan	Central Luzon	Central Luzon	Region III	Central Luzon	1e-05	0.99999	trop1	japonica	0.00781759	0.97773	No deletion	Scanned accession	12.0584	6.84321	2.1772	2.68839	60.2528	13.2255	20.8158	29.8157	139.428	21.1978
258	PTRV474	-	12679	5-070-Red	Red	BINERNAL WHITE	Bulacan	Central Luzon	Central Luzon	Region III	Central Luzon	0.99999	1e-05	indx	Indica	0.0123698	0.964767	NA	Scanned accession	14.7903	6.81741	2.80635	2.36032	64.7027	10.8327	19.2694	34.3746	142.123	20.6898
259	PTRV487	-	12732	6-088-Variable purple	Variable purple	GALO (GASPANG)	Aurora	Central Luzon	Central Luzon	Region III	Central Luzon	1e-05	0.99999	trop1	japonica	0.00716146	0.979602	No deletion	NA	NA	NA	NA	NA	NA	NA	NA	NA	NA	NA
260	PTRV491	-	12739	6-088-Variable purple	Variable purple	GALO (PINO)	Aurora	Central Luzon	Central Luzon	Region III	Central Luzon	0.497478	0.502522	admix	admix	0.435099	-0.239982	No deletion	NA	NA	NA	NA	NA	NA	NA	NA	NA	NA	NA
261	PTRV492	-	12740	7-080-Purple	Purple	GALO (GASPANG)	Aurora	Central Luzon	Central Luzon	Region III	Central Luzon	1e-05	0.99999	trop1	japonica	0.00912052	0.974019	No deletion	Scanned accession	9.38638	5.18996	2.27048	2.1888	31.7515	5.47789	2.92005	9.25111	154.243	2.05557
262	PTRV493	-	12742	7-080-Purple	Purple	GALO (LUBANG/ MALAGKIT)	Aurora	Central Luzon	Central Luzon	Region III	Central Luzon	1e-05	0.99999	trop1	japonica	0.00722259	0.979401	No deletion	NA	NA	NA	NA	NA	NA	NA	NA	NA	NA	NA
263	PTRV496	-	12745	6-088-Variable purple	Variable purple	GALO	Aurora	Central Luzon	Central Luzon	Region III	Central Luzon	1e-05	0.99999	trop1	japonica	0.00651042	0.981457	No deletion	Scanned accession	16.1045	6.68642	3.06238	2.27962	56.5713	9.80782	23.3961	24.7373	146.319	16.8442
264	PTRV498	-	12750	5-070-Red	Red	RED RICE (FROM VISCAYA)	Aurora	Central Luzon	Central Luzon	Region III	Central Luzon	0.975071	0.024929	indx	Indica	0.00787919	0.977564	No deletion	Scanned accession	10.4229	5.62858	2.33002	2.27607	56.2954	17.4963	27.4156	25.7609	138.522	23.9869
265	PTRV499	-	12752	6-088-Variable purple	Variable purple	GALO	Aurora	Central Luzon	Central Luzon	Region III	Central Luzon	1e-05	0.99999	trop1	japonica	0.00976562	0.972185	No deletion	Scanned accession	10.2246	5.96033	2.15391	2.82264	50.3366	15.056	23.8737	20.2896	138.221	17.3995
266	PTRV50	PRRI003675	4501	5-070-Red	Red	KOANTIYAN	Cordillera	Cordillera Administrative Region	CAR	CAR	CAR	0.634501	0.365499	admix	admix	0.189384	0.460504	Ambiguous	NA	NA	NA	NA	NA	NA	NA	NA	NA	NA	NA
267	PTRV501	-	12755	5-070-Red	Red	KAMUROS	Aurora	Central Luzon	Central Luzon	Region III	Central Luzon	1e-05	0.99999	trop1	japonica	0.00520833	0.985165	No deletion	Scanned accession	12.9196	6.1188	2.6317	2.2342	62.858	15.6944	27.6428	32.1207	141.102	27.4927
268	PTRV504	-	12841	6-088-Variable purple	Variable purple	INIPOT-IBON / ININGKANTO	Quezon	Calabarzon	Calabarzon	Region IVA	Calabarzon	1e-05	0.99999	trop1	japonica	0.00976562	0.972185	No deletion	Scanned accession	10.8391	6.42841	2.08392	2.62491	41.7594	10.9708	12.3724	14.5537	131.083	8.27352
269	PTRV507	-	12862	5-070-Red	Red	MINA'ANG	Ifugao	Cordillera Administrative Region	CAR	CAR	CAR	0.99999	1e-05	ind3	Indica	0.00718016	0.979541	No deletion	NA	NA	NA	NA	NA	NA	NA	NA	NA	NA	NA
270	PTRV511	-	12985	5-070-Red	Red	MINI-ANGAN	Ifugao	Cordillera Administrative Region	CAR	CAR	CAR	0.99999	1e-05	ind3	Indica	0.00979752	0.972079	No deletion	Scanned accession	11.4918	6.64672	2.09583	2.63699	64.8988	12.8088	24.9187	34.439	143.017	25.6976
271	PTRV512	-	12986	6-088-Variable purple	Variable purple	ININGKANTO	Quezon	Calabarzon	Calabarzon	Region IVA	Calabarzon	1e-05	0.99999	trop1	japonica	0.00977836	0.972138	No deletion	NA	NA	NA	NA	NA	NA	NA	NA	NA	NA	NA
272	PTRV514	-	13273	5-070-Red	Red	RED RICE B	La Union	Ilocos Region	Ilocos Region	Region I	Ilocos Region	0.514172	0.485828	admix	admix	0.53382	-0.522668	NA	Scanned accession	12.4344	6.40856	2.39155	2.43903	58.2294	13.2102	23.1611	27.2938	141.154	20.6712
273	PTRV516	-	13277	5-070-Red	Red	JAPANESE PEARL	La Union	Ilocos Region	Ilocos Region	Region I	Ilocos Region	0.99999	1e-05	indx	Indica	0.00849118	0.975811	No deletion	NA	NA	NA	NA	NA	NA	NA	NA	NA	NA	NA
274	PTRV518	-	13289	7-080-Purple	Purple	BLACK RICE	Agusan Del Norte	Caraga	Caraga	Region XIII	Mindanao3	0.99999	1e-05	indx	Indica	0.00718016	0.979537	Deletion	NA	NA	NA	NA	NA	NA	NA	NA	NA	NA	NA
275	PTRV520	-	13338	5-070-Red	Red	MIMIS	Kalinga	Cordillera Administrative Region	CAR	CAR	CAR	0.046214	0.953786	trop1	japonica	0.0071708	0.979577	No deletion	NA	NA	NA	NA	NA	NA	NA	NA	NA	NA	NA
276	PTRV523	-	13342	5-070-Red	Red	TUPPAL	Kalinga	Cordillera Administrative Region	CAR	CAR	CAR	0.065871	0.934129	trop1	japonica	0.00456621	0.986988	NA	NA	NA	NA	NA	NA	NA	NA	NA	NA	NA	NA
277	PTRV525	-	13355	5-070-Red	Red	BONGKITAN RED RICE	Benguet	Cordillera Administrative Region	CAR	CAR	CAR	0.119304	0.880696	trop1	japonica	0.00586701	0.98329	NA	Scanned accession	11.7862	6.26765	2.3856	2.40741	65.745	11.6349	23.1558	35.365	143.72	24.3363
278	PTRV530	-	13362	5-070-Red	Red	SHATAKAN TALON	Benguet	Cordillera Administrative Region	CAR	CAR	CAR	0.99999	1e-05	ind3	Indica	0.00976562	0.972185	No deletion	NA	NA	NA	NA	NA	NA	NA	NA	NA	NA	NA
279	PTRV55	PRRI003715	4541	5-070-Red	Red	LUBANG (RED)	Surigao del Sur	Caraga	Caraga	Region XIII	Mindanao3	0.990687	0.009313	ind3	Indica	0.00979752	0.972087	No deletion	Scanned accession	11.4279	5.49163	2.60391	2.17343	60.7555	14.7719	26.2833	30.0685	141.168	25.1354
280	PTRV56	PRRI003729	4555	5-070-Red	Red	MALAGKIT	Surigao del Sur	Caraga	Caraga	Region XIII	Mindanao3	0.99999	1e-05	ind3	Indica	0.00719424	0.979508	No deletion	Scanned accession	11.2988	5.84292	2.42926	2.22177	57.8109	16.0974	24.32	27.5104	138.046	23.4944
281	PTRV570	-	10905	mix(red and white)	mix (red and white)	MATING	Palawan	Mimaropa	Mimaropa	Region IVB	Mimaropa	1e-05	0.99999	trop1	japonica	0.00716612	0.979587	NA	NA	NA	NA	NA	NA	NA	NA	NA	NA	NA	NA
282	PTRV571	-	11197	5-070-Red	Red	PALAWAN	Nueva Ecija	Central Luzon	Central Luzon	Region III	Central Luzon	0.99999	1e-05	indx	Indica	0.00979752	0.972097	NA	NA	NA	NA	NA	NA	NA	NA	NA	NA	NA	NA
283	PTRV573	-	11543	5-070-Red	Red	RED RICE	Benguet	Cordillera Administrative Region	CAR	CAR	CAR	0.99999	1e-05	ind3	Indica	0.00913242	0.973982	NA	Scanned accession	13.3166	6.32719	2.60788	2.22198	61.9312	14.6724	24.5936	31.4177	140.305	24.9529
284	PTRV581	PRRI000084	2067	5-070-Red	Red	SALUGANUM	Nueva Ecija	Central Luzon	Central Luzon	Region III	Central Luzon	0.930241	0.069759	ind3	Indica	0.00651466	0.981447	NA	Scanned accession	12.1575	5.92827	2.53643	2.21548	51.9359	19.1443	23.8189	22.3384	134.428	20.7616
285	PTRV583	PRRI000108	2091	5-070-Red	Red	KIMMABATITI	Metropolitan Manila	National Capital Region	NCR	NCR	NCR	0.99999	1e-05	ind3	Indica	0.0878113	0.749645	No deletion	Scanned accession	12.5617	6.57329	2.33598	2.4382	50.5248	17.8863	23.217	21.0015	135.017	19.0366
286	PTRV584	PRRI000114	2097	5-070-Red	Red	MACABIAG	Metropolitan Manila	National Capital Region	NCR	NCR	NCR	0.99999	1e-05	ind3	Indica	0.22469	0.35989	No deletion	Scanned accession	12.2703	6.46016	2.33796	2.43409	51.3431	18.1138	24.5031	21.6206	135.6	20.0275
287	PTRV586	PRRI000124	2107	5-070-Red	Red	PARPARIA	Metropolitan Manila	National Capital Region	NCR	NCR	NCR	0.99999	1e-05	ind3	Indica	0.0084801	0.975844	No deletion	NA	NA	NA	NA	NA	NA	NA	NA	NA	NA	NA
288	PTRV589	PRRI000145	2128	5-070-Red	Red	BELIBOD	Camarines Sur	Bicol Region	Bicol Region	Region V	Bicol Region	0.99999	1e-05	ind3	Indica	0.119948	0.658289	NA	Scanned accession	12.0675	5.65041	2.65551	2.07751	62.0836	15.6566	27.6529	31.5596	140.788	27.4622
289	PTRV59	PRRI003823	4652	5-070-Red	Red	MUNAN	Palawan	Mimaropa	Mimaropa	Region IVB	Mimaropa	1e-05	0.99999	trop1	japonica	0.00521512	0.98514	No deletion	Scanned accession	12.1515	6.74596	2.21293	2.46864	55.0556	16.4334	25.8082	24.5041	138.631	21.6976
290	PTRV591	PRRI000153	2136	6-088-Variable purple	Variable purple	MARAGADAN	Metropolitan Manila	National Capital Region	NCR	NCR	NCR	0.955685	0.044315	ind3	Indica	0.020235	0.942421	No deletion	NA	NA	NA	NA	NA	NA	NA	NA	NA	NA	NA
291	PTRV594	PRRI000157	2140	5-070-Red	Red	KINTUMAN (DALOG)	Metropolitan Manila	National Capital Region	NCR	NCR	NCR	0.99999	1e-05	ind3	Indica	0.00980392	0.972073	No deletion	Scanned accession	12.171	6.20612	2.45308	2.26861	54.9438	18.0434	25.1366	24.735	136.516	22.6007
292	PTRV61	PRRI003869	4698	5-070-Red	Red	P. T. Q. D. Q. MALILOM	Cordillera	Cordillera Administrative Region	CAR	CAR	CAR	0.60905	0.39095	admix	admix	0.0163934	0.953343	No deletion	Scanned accession	12.4947	5.88602	2.60278	2.19314	58.4859	14.9094	26.0966	27.3348	140.938	22.7222
293	PTRV65	PRRI003894	4723	5-070-Red	Red	P-PEY PUTAN MENNISAN	Cordillera	Cordillera Administrative Region	CAR	CAR	CAR	0.019299	0.980701	trop1	japonica	0.00585938	0.983311	No deletion	Scanned accession	13.1991	7.42472	2.2169	2.78946	62.6671	14.4102	24.8255	32.1292	140.934	25.2372
294	PTRV66	PRRI003906	4735	5-070-Red	Red	PALEY-PEY PUTAN KABEW	Cordillera	Cordillera Administrative Region	CAR	CAR	CAR	1e-05	0.99999	trop1	japonica	0.00716612	0.979585	No deletion	Scanned accession	12.2836	6.32322	2.47689	2.36858	59.2404	10.7564	20.6061	27.978	142.834	18.1135
295	PTRV68	PRRI003917	4746	5-070-Red	Red	PARAY BUKANKAN	Cordillera	Cordillera Administrative Region	CAR	CAR	CAR	1e-05	0.99999	trop1	japonica	0.00846906	0.975875	No deletion	Scanned accession	13.5739	6.8313	2.48682	2.48854	62.2804	14.7498	25.7076	31.6782	141.03	25.4991
296	PTRV70	PRRI003932	4761	5-070-Red	Red	PARAY KINANDAH	Cordillera	Cordillera Administrative Region	CAR	CAR	CAR	0.017386	0.982614	trop1	japonica	0.00976562	0.972185	No deletion	Scanned accession	13.3027	5.71789	2.90757	2.08406	57.5939	12.0615	25.0556	26.0991	143.458	20.0823
297	PTRV71	PRRI003933	4762	5-070-Red	Red	PARAY KINARABAW	Cordillera	Cordillera Administrative Region	CAR	CAR	CAR	0.020717	0.979283	trop1	japonica	0.00911458	0.974039	No deletion	Scanned accession	11.4488	6.5455	2.15339	2.56574	53.3653	15.2259	24.5984	22.8821	139.23	19.4149
298	PTRV72	PRRI003934	4763	5-070-Red	Red	PARAY KINARATUN	Cordillera	Cordillera Administrative Region	CAR	CAR	CAR	1e-05	0.99999	trop1	japonica	0.00912052	0.974023	No deletion	Scanned accession	14.6377	6.47009	2.90757	2.24797	66.1636	11.1691	21.7493	36.059	143.415	23.5544
299	PTRV74	PRRI003941	4770	5-070-Red	Red	PINARUNGPONG (PULA)	Palawan	Mimaropa	Mimaropa	Region IVB	Mimaropa	1e-05	0.99999	trop1	japonica	0.00651466	0.981441	No deletion	Scanned accession	9.60397	5.51148	2.16331	2.33777	57.4883	15.6169	24.3522	27.0175	138.662	22.7447
300	PTRV75	PRRI004368	5203	5-070-Red	Red	INGNGOPPOR-TINAWON	Cordillera	Cordillera Administrative Region	CAR	CAR	CAR	0.99999	1e-05	indx	Indica	0.00721785	0.979449	Deletion	NA	NA	NA	NA	NA	NA	NA	NA	NA	NA	NA
301	PTRV8	PRRI003182	3940	5-070-Red	Red	KATLONG BULAN	La Union	Ilocos Region	Ilocos Region	Region I	Ilocos Region	0.99999	1e-05	ind3	Indica	0.0325733	0.907199	Deletion	Scanned accession	15.2983	7.07542	2.62773	2.40395	60.9864	14.3962	23.3987	30.4862	140.12	23.3656
302	PTRV82	PRRI005283	6276	5-070-Red	Red	ORTOK	La Union	Ilocos Region	Ilocos Region	Region I	Ilocos Region	0.99999	1e-05	ind3	Indica	0.00783801	0.977659	No deletion	Scanned accession	13.8737	6.53757	2.60987	2.34201	58.4923	14.0077	27.4345	27.4589	142.289	23.4744
303	PTRV88	PRRI005620	7757	5-070-Red	Red	INAMPIK	Lanao del Sur	Autonomous Region in Muslim Mindanao	ARMM	ARMM	Mindanao1	1e-05	0.99999	trop1	japonica	0.0123859	0.964703	No deletion	NA	NA	NA	NA	NA	NA	NA	NA	NA	NA	NA
304	PTRV9	PRRI003186	3944	5-070-Red	Red	KINANDANG PUTI	Oriental Mindoro	Mimaropa	Mimaropa	Region IVB	Mimaropa	0.99999	1e-05	indx	Indica	0.0104302	0.970294	No deletion	Scanned accession	11.46	5.44599	2.64559	2.13454	58.2635	17.6686	27.7629	27.9242	138.504	26.0637
305	PTRV92	PRRI005721	10934	5-070-Red	Red	DORIAT PULA	Palawan	Mimaropa	Mimaropa	Region IVB	Mimaropa	0.013948	0.986052	trop1	japonica	0.00846354	0.975894	No deletion	Scanned accession	8.51562	6.58123	1.61355	3.21927	53.4363	16.2821	25.7648	23.0122	138.608	20.5683
306	PTRV96	PRRI005765	7698	5-070-Red	Red	BOLAW	Lanao del Sur	Autonomous Region in Muslim Mindanao	ARMM	ARMM	Mindanao1	0.027238	0.972762	trop1	japonica	0.0065189	0.981423	No deletion	Scanned accession	11.4647	5.59881	2.592	2.16668	64.867	12.5494	22.9688	34.483	142.271	24.3084
307	PTRV97	PRRI005776	7755	5-070-Red	Red	KOMEKENTING (RED RICE)	Lanao del Sur	Autonomous Region in Muslim Mindanao	ARMM	ARMM	Mindanao1	0.972309	0.027691	ind3	Indica	0.00913838	0.973961	No deletion	Scanned accession	11.5097	6.25375	2.26056	2.43857	60.4211	17.5558	28.7675	29.9844	139.293	27.9913

## Sheet: Table S2
Pairewise Fst comparison between rice varietal types and regions among the 307 unique accessions
varietal Group	First Subpopulation	Second Subpopulation	Fst	Fst Lower Conf. Bound	Fst Upper Conf. Bound
	japonica	Indica	0.501629	0.488286	0.514906
	japonica	admix	0.214361	0.201488	0.228443
	Indica	admix	0.205929	0.192697	0.219044
Regions	First Subpopulation	Second Subpopulation	Fst	Fst Lower Conf. Bound	Fst Upper Conf. Bound
	Mindanao1	Bicol Region	0.109869	0.101247	0.11859
	Mindanao1	Cagayan Valley	0.0464473	0.0381213	0.0553782
	Mindanao1	Calabarzon	0.00987113	0.00610616	0.0137293
	Mindanao1	CAR	0.10844	0.101588	0.116258
	Mindanao1	Mindanao3	0.0299028	0.0258267	0.0342385
	Mindanao1	Central Luzon	0.0327935	0.0285838	0.0375728
	Mindanao1	Visayas	0.0499104	0.0444705	0.0560095
	Mindanao1	Ilocos Region	0.300292	0.289056	0.31184
	Mindanao1	Mimaropa	0.00539553	0.00200494	0.0091785
	Mindanao1	NCR	0.296725	0.284544	0.308405
	Mindanao1	Mindanao2	0.00649836	0.00306924	0.0099209
	Bicol Region	Cagayan Valley	0.114962	0.104213	0.125859
	Bicol Region	Calabarzon	0.0461836	0.0402154	0.0529764
	Bicol Region	CAR	0.0283694	0.0225187	0.0348625
	Bicol Region	Mindanao3	0.00597532	0.00158934	0.0109728
	Bicol Region	Central Luzon	0.0430918	0.0376272	0.0490793
	Bicol Region	Visayas	0.00839208	0.0033498	0.0142181
	Bicol Region	Ilocos Region	0.0787768	0.0717082	0.0875209
	Bicol Region	Mimaropa	0.144791	0.135143	0.154283
	Bicol Region	NCR	0.045564	0.0394849	0.0528509
	Bicol Region	Mindanao2	0.0523851	0.0452474	0.0600793
	Cagayan Valley	Calabarzon	0.0228887	0.0151874	0.0306736
	Cagayan Valley	CAR	0.0523358	0.047587	0.0576118
	Cagayan Valley	Mindanao3	0.061512	0.0531709	0.07085
	Cagayan Valley	Central Luzon	0.0352257	0.0284731	0.0422044
	Cagayan Valley	Visayas	0.0737488	0.064271	0.0838421
	Cagayan Valley	Ilocos Region	0.277871	0.265808	0.290334
	Cagayan Valley	Mimaropa	0.051299	0.0428377	0.0609751
	Cagayan Valley	NCR	0.287455	0.274469	0.300529
	Cagayan Valley	Mindanao2	0.0468082	0.038886	0.0554308
	Calabarzon	CAR	0.0637626	0.0577594	0.0702461
	Calabarzon	Mindanao3	0.00773154	0.00380225	0.0118957
	Calabarzon	Central Luzon	-0.00992138	-0.0117819	-0.00776647
	Calabarzon	Visayas	0.0145803	0.00983185	0.0202635
	Calabarzon	Ilocos Region	0.235521	0.226187	0.246684
	Calabarzon	Mimaropa	0.0153046	0.0113752	0.0198354
	Calabarzon	NCR	0.224977	0.214713	0.235779
	Calabarzon	Mindanao2	0.00986321	0.0054736	0.0152594
	CAR	Mindanao3	0.0510657	0.0451901	0.0572224
	CAR	Central Luzon	0.0613411	0.0566169	0.0667993
	CAR	Visayas	0.0474104	0.0417947	0.0536986
	CAR	Ilocos Region	0.0905618	0.0855317	0.0956677
	CAR	Mimaropa	0.129848	0.121714	0.138866
	CAR	NCR	0.0974492	0.0905726	0.104141
	CAR	Mindanao2	0.064328	0.0585503	0.0711477
	Mindanao3	Central Luzon	0.0169679	0.0132307	0.0207588
	Mindanao3	Visayas	0.00236638	-0.00116703	0.00631048
	Mindanao3	Ilocos Region	0.178714	0.169929	0.189067
	Mindanao3	Mimaropa	0.0645101	0.0584795	0.0709861
	Mindanao3	NCR	0.163026	0.154504	0.173334
	Mindanao3	Mindanao2	0.00372182	-0.000157283	0.00800982
	Central Luzon	Visayas	0.017827	0.013418	0.0231302
	Central Luzon	Ilocos Region	0.211185	0.203049	0.221132
	Central Luzon	Mimaropa	0.0341171	0.0299464	0.0387
	Central Luzon	NCR	0.200737	0.191522	0.209915
	Central Luzon	Mindanao2	0.0233141	0.0192912	0.02792
	Visayas	Ilocos Region	0.169069	0.159941	0.179103
	Visayas	Mimaropa	0.068497	0.0621756	0.0750216
	Visayas	NCR	0.147146	0.138509	0.156183
	Visayas	Mindanao2	0.0237005	0.018389	0.0297905
	Ilocos Region	Mimaropa	0.33439	0.323392	0.346604
	Ilocos Region	NCR	-0.000613663	-0.00414995	0.0032123
	Ilocos Region	Mindanao2	0.225806	0.216099	0.236559
	Mimaropa	NCR	0.334719	0.322497	0.347462
	Mimaropa	Mindanao2	0.0374903	0.0327121	0.0426592
	NCR	Mindanao2	0.216115	0.206366	0.227719
Pairewise Fst comparison between neighbouring rice producing countries
Neighbouring	First Subpopulation	Second Subpopulation	Fst	Fst Lower Conf. Bound	Fst Upper Conf. Bound
	Taiwan	China	0.214455	0.200161	0.225159
	Taiwan	India	0.118649	0.106467	0.124505
	Taiwan	Laos	0.0361473	0.0275903	0.0436731
	Taiwan	Philippines	0.0361859	0.0329978	0.0427853
	China	India	0.115805	0.106814	0.127249
	China	Laos	0.279912	0.268124	0.304453
	China	Philippines	0.225114	0.217329	0.239334
	India	Laos	0.150001	0.141922	0.163712
	India	Philippines	0.162854	0.156118	0.172793
	Laos	Philippines	0.0800396	0.0734969	0.0897064

## Sheet: Table S3
Pairewise Fst comparison between regions considering only the indica accessions among the 307 unique accessions
Subpopulation Pairs	First Subpopulation	Second Subpopulation	Fst	Fst Lower Conf. Bound	Fst Upper Conf. Bound
1	Mindanao1	Bicol Region	0.0537739	0.0523802	0.0813747
2	Mindanao1	Calabarzon	0.047329	0.0330915	0.0664943
3	Mindanao1	CAR	0.180746	0.170248	0.209022
4	Mindanao1	Mindanao3	0.0415549	0.0382944	0.0698499
5	Mindanao1	Central Luzon	0.121164	0.117527	0.148943
6	Mindanao1	Visayas	0.089736	0.0785143	0.113009
7	Mindanao1	Ilocos Region	0.166155	0.154505	0.189647
8	Mindanao1	Mimaropa	0.0142636	-0.0117214	0.0223363
9	Mindanao1	NCR	0.111432	0.10791	0.140818
10	Mindanao1	Mindanao2	0.0152855	0.00541357	0.036816
11	Bicol Region	Calabarzon	-0.0206214	-0.0338825	-0.0124957
12	Bicol Region	CAR	0.102806	0.0839396	0.11185
13	Bicol Region	Mindanao3	0.0244411	0.0211951	0.0449667
14	Bicol Region	Central Luzon	0.00805697	-0.00281692	0.0161909
15	Bicol Region	Visayas	-0.0232472	-0.034306	-0.0148539
16	Bicol Region	Ilocos Region	0.0685283	0.0481098	0.0707088
17	Bicol Region	Mimaropa	0.0230489	0.0130846	0.0408342
18	Bicol Region	NCR	-0.00440643	-0.010359	0.00520534
19	Bicol Region	Mindanao2	0.0544239	0.0429098	0.0722318
20	Calabarzon	CAR	0.121265	0.108571	0.140436
21	Calabarzon	Mindanao3	0.0618664	0.0455643	0.0759026
22	Calabarzon	Central Luzon	0.0219131	0.00993152	0.0331747
23	Calabarzon	Visayas	-0.00189073	-0.0183646	0.00673916
24	Calabarzon	Ilocos Region	0.08861	0.0729682	0.0996346
25	Calabarzon	Mimaropa	-0.00667624	-0.0215204	0.0109659
26	Calabarzon	NCR	0.0307522	0.0177291	0.039778
27	Calabarzon	Mindanao2	0.0692313	0.0510746	0.0848144
28	CAR	Mindanao3	0.144048	0.133484	0.16241
29	CAR	Central Luzon	0.12441	0.109864	0.137221
30	CAR	Visayas	0.0989056	0.0790665	0.107025
31	CAR	Ilocos Region	0.00959039	0.00564135	0.0141124
32	CAR	Mimaropa	0.185114	0.163583	0.203656
33	CAR	NCR	0.0334174	0.0247458	0.0387606
34	CAR	Mindanao2	0.159647	0.135626	0.169546
35	Mindanao3	Central Luzon	0.0985671	0.0936003	0.1207
36	Mindanao3	Visayas	0.0542392	0.0495846	0.0760104
37	Mindanao3	Ilocos Region	0.120592	0.107175	0.13467
38	Mindanao3	Mimaropa	0.114952	0.0987146	0.137526
39	Mindanao3	NCR	0.0746766	0.0708967	0.096268
40	Mindanao3	Mindanao2	-0.0428162	-0.0525433	-0.0338623
41	Central Luzon	Visayas	-0.0125784	-0.0172611	-0.00105135
42	Central Luzon	Ilocos Region	0.0872444	0.0712765	0.0922538
43	Central Luzon	Mimaropa	0.0301752	0.0189152	0.0495608
44	Central Luzon	NCR	0.0300178	0.023674	0.0427181
45	Central Luzon	Mindanao2	0.130514	0.117791	0.151596
46	Visayas	Ilocos Region	0.0736197	0.0545228	0.0768662
47	Visayas	Mimaropa	0.0311955	0.014207	0.0499079
48	Visayas	NCR	0.00703192	-0.00510729	0.0125364
49	Visayas	Mindanao2	0.0855113	0.0698725	0.103242
50	Ilocos Region	Mimaropa	0.154549	0.137	0.171183
51	Ilocos Region	NCR	0.0123323	0.00602578	0.0161322
52	Ilocos Region	Mindanao2	0.143193	0.117608	0.148362
53	Mimaropa	NCR	0.0735719	0.0629291	0.0928417
54	Mimaropa	Mindanao2	0.101703	0.0797259	0.120044
55	NCR	Mindanao2	0.0970892	0.0797709	0.110475

## Sheet: Table S4
Pairewise Fst comparison between regions considering only the japonica accessions among the 307 unique accessions
Subpopulation Pairs	First Subpopulation	Second Subpopulation	Fst	Fst Lower Conf. Bound	Fst Upper Conf. Bound
1	Bicol Region	CAR	0.184435	0.15625	0.20473
2	Bicol Region	Cagayan Valley	0.175726	0.147293	0.198224
3	Bicol Region	Calabarzon	0.0305397	0.0108022	0.0471942
4	Bicol Region	Central Luzon	0.0439028	0.0338386	0.0693152
5	Bicol Region	Ilocos Region	0.092365	0.0708737	0.132431
6	Bicol Region	Mimaropa	0.0477939	0.0304299	0.0635138
7	Bicol Region	Mindanao1	0.0341475	0.0122823	0.0446765
8	Bicol Region	Mindanao2	0.0831896	0.0557679	0.102169
9	Bicol Region	Mindanao3	-0.0137836	-0.0322918	-0.000537576
10	Bicol Region	Visayas	0.105008	0.0806881	0.13346
11	CAR	Cagayan Valley	-0.00698195	-0.0154229	0.00015487
12	CAR	Calabarzon	0.116627	0.103001	0.128134
13	CAR	Central Luzon	0.133203	0.11682	0.143967
14	CAR	Ilocos Region	-0.00878476	-0.0324996	-0.00596699
15	CAR	Mimaropa	0.111951	0.0896747	0.114515
16	CAR	Mindanao1	0.122143	0.106277	0.129902
17	CAR	Mindanao2	0.141915	0.120585	0.152039
18	CAR	Mindanao3	0.168169	0.142078	0.176154
19	CAR	Visayas	0.202201	0.182258	0.220412
20	Cagayan Valley	Calabarzon	0.0918965	0.0766311	0.108293
21	Cagayan Valley	Central Luzon	0.106176	0.0895771	0.117799
22	Cagayan Valley	Ilocos Region	-0.0255357	-0.0419601	-0.00971693
23	Cagayan Valley	Mimaropa	0.114567	0.0964965	0.125404
24	Cagayan Valley	Mindanao1	0.120301	0.105885	0.135372
25	Cagayan Valley	Mindanao2	0.143184	0.121473	0.156881
26	Cagayan Valley	Mindanao3	0.165377	0.139255	0.175408
27	Cagayan Valley	Visayas	0.212222	0.192023	0.235822
28	Calabarzon	Central Luzon	0.00122351	-0.00314112	0.00717689
29	Calabarzon	Ilocos Region	0.0411818	0.0264142	0.0629218
30	Calabarzon	Mimaropa	0.023755	0.0184933	0.0333562
31	Calabarzon	Mindanao1	0.0328034	0.0280415	0.0459663
32	Calabarzon	Mindanao2	0.0631429	0.0540467	0.0791723
33	Calabarzon	Mindanao3	0.0336382	0.0197956	0.0403865
34	Calabarzon	Visayas	0.0841581	0.0754023	0.106179
35	Central Luzon	Ilocos Region	0.0691664	0.0542795	0.0900937
36	Central Luzon	Mimaropa	0.0412666	0.0366831	0.051796
37	Central Luzon	Mindanao1	0.0598008	0.053194	0.0707138
38	Central Luzon	Mindanao2	0.0770321	0.0698434	0.0936897
39	Central Luzon	Mindanao3	0.0568181	0.043452	0.0646034
40	Central Luzon	Visayas	0.103758	0.0948313	0.124731
41	Ilocos Region	Mimaropa	0.0426903	0.0300447	0.0639355
42	Ilocos Region	Mindanao1	0.0339238	0.023487	0.0528611
43	Ilocos Region	Mindanao2	0.0610063	0.0436197	0.0818272
44	Ilocos Region	Mindanao3	0.0917992	0.0653369	0.104869
45	Ilocos Region	Visayas	0.151399	0.140012	0.189627
46	Mimaropa	Mindanao1	0.0219094	0.0156477	0.0287454
47	Mimaropa	Mindanao2	0.0407746	0.0289612	0.0462463
48	Mimaropa	Mindanao3	0.0520656	0.0386466	0.0599318
49	Mimaropa	Visayas	0.0737347	0.0678428	0.0936957
50	Mindanao1	Mindanao2	0.0141905	0.00242914	0.0158787
51	Mindanao1	Mindanao3	0.0230149	0.011187	0.0257037
52	Mindanao1	Visayas	0.0823669	0.0754047	0.099816
53	Mindanao2	Mindanao3	0.0762153	0.0623881	0.0872873
54	Mindanao2	Visayas	0.117934	0.112801	0.150973
55	Mindanao3	Visayas	0.0742472	0.0609779	0.087973

## Sheet: Table S5
Descriptive statistics of colour parameters and geometric-related traits
	Area	Length	Width	Roundness	L.	a*	b*	Intensity	Hue	Saturation
min	7.99	4.29	1.61	2	27.67	1.45	-0.43	7.48	120.24	1.02
max	17.03	8	3.06	3.22	70.32	19.54	31.52	41.14	198.61	29.46
range	9.04	3.71	1.45	1.22	42.65	18.08	31.95	33.67	78.38	28.44
median	12.43	6.39	2.49	2.34	57.34	15.07	24.3	26.59	139.68	22.08
mean	12.58	6.36	2.47	2.37	54.94	14.23	22.3	25.33	140.72	20.18
SE.mean	0.12	0.04	0.02	0.01	0.64	0.24	0.48	0.49	0.66	0.49
var	2.82	0.36	0.06	0.04	79.52	11.66	45.92	48.05	86.15	47.48
std.dev	1.68	0.6	0.25	0.2	8.92	3.42	6.78	6.93	9.28	6.89
coef.var	0.13	0.09	0.1	0.09	0.16	0.24	0.3	0.27	0.07	0.34
Shapiro-Wilk p-value	0.2589	0.6737	0.5107	8.053e-07	7.441e-13	1.414e-11	2.2e-16	7.177e-08	2.2e-16	2.367e-14

## Sheet: Table S6
Data: Intensity by Colour
F4,192 = 74.96,, p-value =2e-16
P-value <0.05, we reject the null hypothesis. Therefore, there is difference in intensity based on the pericarp color
Intensity Turkey Post hoc test				diff	lwr	upr	p adj
1	Purple	vs	Mix (red and white)	-16.6781	-25.8315	-7.52462	1.17e-05
2	Red	vs	Mix (red and white)	0.248241	-8.32465	8.82114	0.999991
3	Variable purple	vs	Mix (red and white)	-13.6373	-22.7091	-4.56562	0.000495
4	White-	vs	Mix (red and white)	3.92047	-8.13062	15.9716	0.898146
5	Red	vs	Purple	16.9263	13.4548	20.3979	0
6	Variable purple	vs	Purple	3.04074	-1.52581	7.60728	0.35728
7	White	vs	Purple	20.5985	11.4451	29.752	0
8	Variable purple	vs	Red	-13.8856	-17.1355	-10.6357	0
9	White	vs	Red	3.67223	-4.90067	12.2451	0.763035
10	White		Variable purple	17.5578	8.48608	26.6295	2.7e-06
Data: Saturation by Colour
F4,192 = 143.7,, p-value =2e-16
P-value <0.05, we reject the null hypothesis. Therefore, there is difference in saturation between rice accessions with different pericarp color
Saturation_Turkey Post hoc test
				diff	lwr	upr	p adj
1	Purple	vs	Mix (red and white)	-19.3976	-26.6852	-12.11	0
2	Red	vs	Mix (red and white)	-0.46827	-7.29366	6.35712	0.999713
3	Variable purple	vs	Mix (red and white	-15.5639	-22.7864	-8.34134	1e-07
4	White	vs	Mix (red and white)	1.52556	-8.06903	11.1201	0.992314
5	Red-	vs	Purple	18.9293	16.1654	21.6932	0
6	Variable purple	vs	Purple	3.83373	0.198034	7.46943	0.0331493
7	White	vs	Purple	20.9232	13.6356	28.2108	0
8	Variable purple	vs	Red	-15.0956	-17.6831	-12.5081	0
9	White	vs	Red	1.99383	-4.83156	8.81922	0.928996
10	White		Variable purple	17.0894	9.8669	24.312	0
Data: Lighthness by Colour
F4,192 = 109.2, p-value =2e-16
P-value <0.05, we reject the null hypothesis. Therefore, there is difference in saturation between rice accessions with different pericarp color
Lightness Turkey Post hoc test
				diff	lwr	upr	p adj
1	Purple	vs	Mix (red and white)	-23.3983	-33.8117	-12.985	0
2	Red	vs	Mix (red and white)	0.34886	-9.40401	10.1017	0.999978
3	Variable purple	vs	Mix (red and white)	-18.2158	-28.5361	-7.89542	2.38e-05
4	White	vs	Mix (red and white)	4.40243	-9.30736	18.1122	0.902417
5	Red	vs	Purple	23.7472	19.7978	27.6965	0
6	Variable purple	vs	Purple	5.18254	-0.012544	10.3776	0.0508914
7	White	vs	Purple	27.8008	17.3874	38.2141	0
8	Variable purple	vs	Red	-18.5646	-22.2619	-14.8674	0
9	White	vs	Red	4.05357	-5.69929	13.8064	0.782553
10	White	vs	Variable purple	22.6182	12.2978	32.9386	1e-07

## Sheet: Table S7
Passport information on the 696 Philippine traditional pigmented rice accession collected
Num	Samples	Accession	Collection	Caryopsiscolordescriptors	Caryopsis color	Rice varieties	Province	Region	Region2	The_regional_designation	V1 (Q1 matrix at K =2)	V2 (Q2 matrix at K =2)	Subspecies clasification by phylogenetic analyses	varietal group from admixture outputs
1	15485	NA	NA	5-070-Red	Red	MALAGKIT KAPA	Basilan	Autonomous Region in Muslim Mindanao	ARMM	ARMM	1e-05	0.99999	trop1	japonica
2	15648	NA	NA	5-070-Red	Red	KABANGALAN	Basilan	Autonomous Region in Muslim Mindanao	ARMM	ARMM	0.079015	0.920985	trop1	japonica
3	15649	NA	NA	5-070-Red	Red	ALONG-ALONG	Basilan	Autonomous Region in Muslim Mindanao	ARMM	ARMM	1e-05	0.99999	trop1	japonica
4	13914	NA	NA	5-070-Red	Red	DINORADO _PUTI	Maguindanao	Autonomous Region in Muslim Mindanao	ARMM	ARMM	1e-05	0.99999	trop1	japonica
5	13915	NA	NA	5-070-Red	Red	KATIBOS	Maguindanao	Autonomous Region in Muslim Mindanao	ARMM	ARMM	1e-05	0.99999	trop1	japonica
6	15510	NA	NA	5-070-Red	Red	INABAKA	Maguindanao	Autonomous Region in Muslim Mindanao	ARMM	ARMM	1e-05	0.99999	trop1	japonica
7	PTRV10	PRRI003194	3952	5-070-Red	Red	KOBBEH	Mindanao	Autonomous Region in Muslim Mindanao	ARMM	ARMM	0.976462	0.023538	ind3	Indica
8	15460	NA	NA	5-070-Red	Red	JARNANG	Tawi Tawi	Autonomous Region in Muslim Mindanao	ARMM	ARMM	1e-05	0.99999	trop1	japonica
9	15461	NA	NA	5-070-Red	Red	ZAMBALES	Tawi Tawi	Autonomous Region in Muslim Mindanao	ARMM	ARMM	1e-05	0.99999	trop1	japonica
10	15462	NA	NA	5-070-Red	Red	PUTAN PIKPIKAN	Tawi Tawi	Autonomous Region in Muslim Mindanao	ARMM	ARMM	1e-05	0.99999	trop1	japonica
11	PTRV20	PRRI003241	4000	7-080-Purple	Purple	PUTAN MAKATIPU	Basilan	Autonomous Region in Muslim Mindanao	ARMM	ARMM	1e-05	0.99999	trop1	japonica
12	PTRV352	PRRI002485	3880	5-070-Red	Red	BANING	Basilan	Autonomous Region in Muslim Mindanao	ARMM	ARMM	1e-05	0.99999	trop1	japonica
13	PTRV132	PRRI006325	7623	5-070-Red	Red	ALIMONA	Lanao del Sur	Autonomous Region in Muslim Mindanao	ARMM	ARMM	0.99999	1e-05	ind3	Indica
14	PTRV133	PRRI006308	7625	5-070-Red	Red	ALIMONA	Lanao del Sur	Autonomous Region in Muslim Mindanao	ARMM	ARMM	0.99999	1e-05	ind3	Indica
15	PTRV180	PRRI006307	7764	1-010-White	White	YOUNG MASTER	Lanao del Sur	Autonomous Region in Muslim Mindanao	ARMM	ARMM	0.99999	1e-05	ind1B	Indica
16	PTRV371	-	7761	5-070-Red	Red	GINATAAN	Lanao del Sur	Autonomous Region in Muslim Mindanao	ARMM	ARMM	1e-05	0.99999	trop1	japonica
17	PTRV372	-	7762	6-088-Variable purple	Variable purple	KOTONG (PILIT)	Lanao del Sur	Autonomous Region in Muslim Mindanao	ARMM	ARMM	1e-05	0.99999	trop1	japonica
18	PTRV76	PRRI005008	7624	5-070-Red	Red	ALIMONA	Lanao del Sur	Autonomous Region in Muslim Mindanao	ARMM	ARMM	0.99999	1e-05	ind3	Indica
19	PTRV88	PRRI005620	7757	5-070-Red	Red	INAMPIK	Lanao del Sur	Autonomous Region in Muslim Mindanao	ARMM	ARMM	1e-05	0.99999	trop1	japonica
20	PTRV96	PRRI005765	7698	5-070-Red	Red	BOLAW	Lanao del Sur	Autonomous Region in Muslim Mindanao	ARMM	ARMM	0.027238	0.972762	trop1	japonica
21	PTRV97	PRRI005776	7755	5-070-Red	Red	KOMEKENTING (RED RICE)	Lanao del Sur	Autonomous Region in Muslim Mindanao	ARMM	ARMM	0.972309	0.027691	ind3	Indica
22	15253	NA	NA	5-070-Red	Red	KABUDIT	Albay	Bicol Region	Bicol Region	Region V	0.99999	1e-05	indx	Indica
23	15262	NA	NA	5-070-Red	Red	KABUDIT	Albay	Bicol Region	Bicol Region	Region V	0.99999	1e-05	indx	Indica
24	PTRV212	PRRI000154	2137	7-080-Purple	Purple	MARAGADAW	Albay	Bicol Region	Bicol Region	Region V	0.943485	0.056515	ind3	Indica
25	PTRV250	PRRI000387	2370	5-070-Red	Red	KABODIT	Albay	Bicol Region	Bicol Region	Region V	0.99999	1e-05	indx	Indica
26	PTRV254	PRRI000391	2374	5-070-Red	Red	SABLAY	Albay	Bicol Region	Bicol Region	Region V	0.99999	1e-05	ind3	Indica
27	PTRV592	PRRI000154	2137	7-080-Purple	Purple	MARAGADAW	Albay	Bicol Region	Bicol Region	Region V	0.943493	0.056507	ind3	Indica
28	PTRV147	PRRI003106	3849	6-088-Variable purple	Variable purple	PILIT TAPUL	Camarines Sur	Bicol Region	Bicol Region	Region V	0.020137	0.979863	trop1	japonica
29	PTRV209	PRRI000145	2128	5-070-Red	Red	BELIBOD	Camarines Sur	Bicol Region	Bicol Region	Region V	0.99999	1e-05	indx	Indica
30	PTRV248	PRRI000385	2368	5-070-Red	Red	BINORSIGE	Camarines Sur	Bicol Region	Bicol Region	Region V	0.99999	1e-05	indx	Indica
31	PTRV253	PRRI000390	2373	6-088-Variable purple	Variable purple	PALAGADAN	Camarines Sur	Bicol Region	Bicol Region	Region V	0.884672	0.115328	ind3	Indica
32	PTRV294	PRRI000589	1383	5-070-Red	Red	GININTO	Camarines Sur	Bicol Region	Bicol Region	Region V	1e-05	0.99999	trop1	japonica
33	PTRV295	PRRI000593	1390	5-070-Red	Red	BELIBOD	Camarines Sur	Bicol Region	Bicol Region	Region V	0.99999	1e-05	indx	Indica
34	PTRV316	PRRI000887	1387	7-080-Purple	Purple	ROTONG SUMA - OY	Camarines Sur	Bicol Region	Bicol Region	Region V	0.99999	1e-05	ind1B	Indica
35	PTRV544	-	13499	5-070-Red	Red	BALLATINAW DATI	Camarines Sur	Bicol Region	Bicol Region	Region V	1e-05	0.99999	trop1	japonica
36	PTRV589	PRRI000145	2128	5-070-Red	Red	BELIBOD	Camarines Sur	Bicol Region	Bicol Region	Region V	0.99999	1e-05	ind3	Indica
37	PTRV165	PRRI003803	4632	5-070-Red	Red	MILAGROSA	Catanduanes	Bicol Region	Bicol Region	Region V	0.99999	1e-05	indx	Indica
38	PTRV166	PRRI003810	4639	5-070-Red	Red	MILAGROSANG BAROYAN	Catanduanes	Bicol Region	Bicol Region	Region V	0.99999	1e-05	indx	Indica
39	PTRV57	PRRI003801	4630	5-070-Red	Red	MILAGROSA	Catanduanes	Bicol Region	Bicol Region	Region V	0.99999	1e-05	indx	Indica
40	PTRV58	PRRI003802	4631	5-070-Red	Red	MILAGROSA	Catanduanes	Bicol Region	Bicol Region	Region V	0.99999	1e-05	indx	Indica
41	PTRV89	PRRI005647	4629	5-070-Red	Red	MILAGROSA	Catanduanes	Bicol Region	Bicol Region	Region V	0.99999	1e-05	indx	Indica
42	15614	NA	NA	5-070-Red	Red	KABOYO	Masbate	Bicol Region	Bicol Region	Region V	1e-05	0.99999	trop1	japonica
43	15617	NA	NA	5-070-Red	Red	DUKOT	Masbate	Bicol Region	Bicol Region	Region V	1e-05	0.99999	trop1	japonica
44	PTRV247	PRRI000384	2367	5-070-Red	Red	BAKHAW	Sorsogon	Bicol Region	Bicol Region	Region V	0.633789	0.366211	admix	admix
45	PTRV392	-	11572	5-070-Red	Red	MALAGKIT	Batanes	Cagayan Valley	Cagayan Valley	Region II	1e-05	0.99999	trop1	japonica
46	PTRV393	-	11573	5-070-Red	Red	MALAGKIT	Batanes	Cagayan Valley	Cagayan Valley	Region II	1e-05	0.99999	trop1	japonica
47	PTRV394	-	11574	5-070-Red	Red	MALAGKIT	Batanes	Cagayan Valley	Cagayan Valley	Region II	1e-05	0.99999	trop1	japonica
48	PTRV395	-	11575	5-070-Red	Red	MALAGKIT MAVAHENG	Batanes	Cagayan Valley	Cagayan Valley	Region II	1e-05	0.99999	trop1	japonica
49	PTRV397	-	11577	5-070-Red	Red	MALAGKIT	Batanes	Cagayan Valley	Cagayan Valley	Region II	1e-05	0.99999	trop1	japonica
50	PTRV398	-	11580	5-070-Red	Red	MALAGKIT	Batanes	Cagayan Valley	Cagayan Valley	Region II	1e-05	0.99999	trop1	japonica
51	PTRV399	-	11581	5-070-Red	Red	MALAGKIT	Batanes	Cagayan Valley	Cagayan Valley	Region II	1e-05	0.99999	trop1	japonica
52	PTRV400	-	11583	5-070-Red	Red	ORANGE RICE	Batanes	Cagayan Valley	Cagayan Valley	Region II	1e-05	0.99999	trop1	japonica
53	PTRV401	-	11584	5-070-Red	Red	MALAGKIT	Batanes	Cagayan Valley	Cagayan Valley	Region II	1e-05	0.99999	trop1	japonica
54	PTRV402	-	11585	5-070-Red	Red	DICU	Batanes	Cagayan Valley	Cagayan Valley	Region II	1e-05	0.99999	trop1	japonica
55	PTRV403	-	11593	5-070-Red	Red	MALAGKIT	Batanes	Cagayan Valley	Cagayan Valley	Region II	1e-05	0.99999	trop1	japonica
56	PTRV404	-	11595	5-070-Red	Red	MALAGKIT	Batanes	Cagayan Valley	Cagayan Valley	Region II	1e-05	0.99999	trop1	japonica
57	PTRV405	-	11602	5-070-Red	Red	MALAGKIT MAVAWENG	Batanes	Cagayan Valley	Cagayan Valley	Region II	1e-05	0.99999	trop1	japonica
58	PTRV406	-	11606	5-070-Red	Red	MALAGKIT	Batanes	Cagayan Valley	Cagayan Valley	Region II	1e-05	0.99999	trop1	japonica
59	PTRV407	-	11608	5-070-Red	Red	MALAGKIT NA MAVAWENG	Batanes	Cagayan Valley	Cagayan Valley	Region II	1e-05	0.99999	trop1	japonica
60	PTRV408	-	11610	5-070-Red	Red	MALAGKIT NA MAVAWUNG	Batanes	Cagayan Valley	Cagayan Valley	Region II	1e-05	0.99999	trop1	japonica
61	PTRV260	PRRI000415	2398	5-070-Red	Red	BANSOROY	Cagayan	Cagayan Valley	Cagayan Valley	Region II	0.99999	1e-05	ind3	Indica
62	PTRV327	PRRI001750	13	5-070-Red	Red	ALIMURAN	Cagayan	Cagayan Valley	Cagayan Valley	Region II	1e-05	0.99999	trop1	japonica
63	PTRV330	PRRI001776	141	5-070-Red	Red	TADYOK	Cagayan	Cagayan Valley	Cagayan Valley	Region II	0.99999	1e-05	ind3	Indica
64	PTRV338	PRRI001863	125	5-070-Red	Red	BANSUROY	Cagayan	Cagayan Valley	Cagayan Valley	Region II	0.99999	1e-05	ind3	Indica
65	PTRV344	PRRI001932	3203	5-070-Red	Red	MIMIS	Cagayan	Cagayan Valley	Cagayan Valley	Region II	0.562354	0.437646	admix	admix
66	PTRV345	PRRI001946	3218	5-070-Red	Red	ALINDAYO	Cagayan	Cagayan Valley	Cagayan Valley	Region II	1e-05	0.99999	trop1	japonica
67	PTRV346	PRRI001948	3220	5-070-Red	Red	AYUKAN (DIKET)	Cagayan	Cagayan Valley	Cagayan Valley	Region II	1e-05	0.99999	trop1	japonica
68	14762	NA	NA	5-070-Red	Red	PALAWAN RED	Isabela	Cagayan Valley	Cagayan Valley	Region II	1e-05	0.99999	trop1	japonica
69	14764	NA	NA	5-070-Red	Red	PINILISA	Isabela	Cagayan Valley	Cagayan Valley	Region II	1e-05	0.99999	trop1	japonica
70	14773	NA	NA	5-070-Red	Red	PINILISA	Isabela	Cagayan Valley	Cagayan Valley	Region II	1e-05	0.99999	trop1	japonica
71	14774	NA	NA	5-070-Red	Red	PINILISA	Isabela	Cagayan Valley	Cagayan Valley	Region II	1e-05	0.99999	trop1	japonica
72	PTRV208	PRRI000142	2125	mix(red and variant purple)	mix (red and variant purple)	FINILIZA	Isabela	Cagayan Valley	Cagayan Valley	Region II	1e-05	0.99999	trop1	japonica
73	PTRV245	PRRI000374	2357	5-070-Red	Red	IKAT	Isabela	Cagayan Valley	Cagayan Valley	Region II	1e-05	0.99999	trop1	japonica
74	PTRV266	PRRI000459	2442	5-070-Red	Red	ALLILIK	Isabela	Cagayan Valley	Cagayan Valley	Region II	1e-05	0.99999	trop1	japonica
75	PTRV277	PRRI000521	2504	5-070-Red	Red	DI-TINTA	Isabela	Cagayan Valley	Cagayan Valley	Region II	1e-05	0.99999	trop1	japonica
76	PTRV350	PRRI002466	3835	5-070-Red	Red	BALIBUD	Isabela	Cagayan Valley	Cagayan Valley	Region II	0.99999	1e-05	indx	Indica
77	PTRV160	PRRI003526	4350	5-070-Red	Red	DINARUNAN	Nueva Vizcaya	Cagayan Valley	Cagayan Valley	Region II	1e-05	0.99999	trop1	japonica
78	PTRV168	PRRI004194	5029	5-070-Red	Red	QADITAWAN	Nueva Vizcaya	Cagayan Valley	Cagayan Valley	Region II	1e-05	0.99999	trop1	japonica
79	PTRV169	PRRI004277	5112	1-010-White	White	SIPLATAN	Nueva Vizcaya	Cagayan Valley	Cagayan Valley	Region II	1e-05	0.99999	trop1	japonica
80	PTRV30	PRRI003307	4077	5-070-Red	Red	TAPIAK	Nueva Vizcaya	Cagayan Valley	Cagayan Valley	Region II	0.99999	1e-05	indx	Indica
81	PTRV37	PRRI003429	4252	5-070-Red	Red	BELISIYAN	Nueva Vizcaya	Cagayan Valley	Cagayan Valley	Region II	1e-05	0.99999	trop1	japonica
82	PTRV38	PRRI003434	4257	5-070-Red	Red	BENRAT	Nueva Vizcaya	Cagayan Valley	Cagayan Valley	Region II	1e-05	0.99999	trop1	japonica
83	PTRV39	PRRI003448	4272	5-070-Red	Red	BINEGQIT	Nueva Vizcaya	Cagayan Valley	Cagayan Valley	Region II	1e-05	0.99999	trop1	japonica
84	PTRV44	PRRI003485	4309	5-070-Red	Red	BUTU	Nueva Vizcaya	Cagayan Valley	Cagayan Valley	Region II	1e-05	0.99999	trop1	japonica
85	PTRV47	PRRI003623	4449	5-070-Red	Red	KABEYUWAN	Nueva Vizcaya	Cagayan Valley	Cagayan Valley	Region II	1e-05	0.99999	trop1	japonica
86	PTRV48	PRRI003646	4472	5-070-Red	Red	KATAQERAN	Nueva Vizcaya	Cagayan Valley	Cagayan Valley	Region II	1e-05	0.99999	trop1	japonica
87	PTRV49	PRRI003674	4500	5-070-Red	Red	KIQLAWAN	Nueva Vizcaya	Cagayan Valley	Cagayan Valley	Region II	1e-05	0.99999	trop1	japonica
88	PTRV51	PRRI003692	4518	5-070-Red	Red	LAKAY	Nueva Vizcaya	Cagayan Valley	Cagayan Valley	Region II	1e-05	0.99999	trop1	japonica
89	15239	NA	NA	5-070-Red	Red	KINANDA RED	Batangas	Calabarzon	Calabarzon	Region IVA	1e-05	0.99999	trop1	japonica
90	PTRV221	PRRI000223	2206	5-070-Red	Red	TAAL 1	Batangas	Calabarzon	Calabarzon	Region IVA	1e-05	0.99999	trop1	japonica
91	PTRV331	PRRI001780	170	5-070-Red	Red	BULUHAN (B)	Batangas	Calabarzon	Calabarzon	Region IVA	0.99999	1e-05	indx	Indica
92	PTRV332	PRRI001784	185	5-070-Red	Red	BULUHAN (C)	Batangas	Calabarzon	Calabarzon	Region IVA	0.868052	0.131948	indx	Indica
93	PTRV333	PRRI001785	186	5-070-Red	Red	KINANDA	Batangas	Calabarzon	Calabarzon	Region IVA	1e-05	0.99999	trop1	japonica
94	PTRV339	PRRI001868	148	5-070-Red	Red	GAKIT	Batangas	Calabarzon	Calabarzon	Region IVA	0.99999	1e-05	indx	Indica
95	PTRV340	PRRI001880	183	5-070-Red	Red	BULUHAN (A)	Batangas	Calabarzon	Calabarzon	Region IVA	0.99999	1e-05	indx	Indica
96	PTRV343	PRRI001920	169-B	5-070-Red	Red	BULUHAN (A)	Batangas	Calabarzon	Calabarzon	Region IVA	1e-05	0.99999	trop1	japonica
97	PTRV347	PRRI002170	182	1-010-White	White	BINIRHEN (B)	Batangas	Calabarzon	Calabarzon	Region IVA	0.99999	1e-05	ind3	Indica
98	PTRV348	PRRI002267	1216	5-070-Red	Red	MALAGKIT (INAKU-NENENG) / DINAKOT	Batangas	Calabarzon	Calabarzon	Region IVA	0.99999	1e-05	indx	Indica
99	PTRV355	PRRI002766	1218	5-070-Red	Red	KINANDANG PULA	Batangas	Calabarzon	Calabarzon	Region IVA	0.99999	1e-05	ind1B	Indica
100	15240	NA	NA	5-070-Red	Red	KINANDA RED	Batangas	Calabarzon	Calabarzon	Region IVA	1e-05	0.99999	trop1	japonica
101	12841-A	NA	NA	5-070-Red	Red	INIPOT-IBON_ININGKANTO	Quezon	Calabarzon	Calabarzon	Region IVA	1e-05	0.99999	trop1	japonica
102	12846-A	NA	NA	5-070-Red	Red	KINAMUROS	Quezon	Calabarzon	Calabarzon	Region IVA	1e-05	0.99999	trop1	japonica
103	PTRV229	PRRI000292	2275	5-070-Red	Red	INUWAK	Quezon	Calabarzon	Calabarzon	Region IVA	0.962126	0.037874	ind3	Indica
104	PTRV296	PRRI000601	1400	5-070-Red	Red	KINALANSING	Quezon	Calabarzon	Calabarzon	Region IVA	1e-05	0.99999	trop1	japonica
105	PTRV297	PRRI000613	1417	6-088-Variable purple	Variable purple	INIPOT-IBON	Quezon	Calabarzon	Calabarzon	Region IVA	0.99999	1e-05	ind1B	Indica
106	PTRV298	PRRI000616	1420	5-070-Red	Red	NAGSALAY	Quezon	Calabarzon	Calabarzon	Region IVA	1e-05	0.99999	trop1	japonica
107	PTRV299	PRRI000619	1426	5-070-Red	Red	MINITA	Quezon	Calabarzon	Calabarzon	Region IVA	1e-05	0.99999	trop1	japonica
108	PTRV300	PRRI000620	1428	5-070-Red	Red	BINARIT	Quezon	Calabarzon	Calabarzon	Region IVA	1e-05	0.99999	trop1	japonica
109	PTRV301	PRRI000625	1434	5-070-Red	Red	NAGSALAY	Quezon	Calabarzon	Calabarzon	Region IVA	1e-05	0.99999	trop1	japonica
110	PTRV302	PRRI000626	1435	mix(red and white)	mix (red and white)	PINILIK	Quezon	Calabarzon	Calabarzon	Region IVA	1e-05	0.99999	trop1	japonica
111	PTRV303	PRRI000627	1436	5-070-Red	Red	NINANGKA	Quezon	Calabarzon	Calabarzon	Region IVA	1e-05	0.99999	trop1	japonica
112	PTRV304	PRRI000631	1443	5-070-Red	Red	CAMOROS	Quezon	Calabarzon	Calabarzon	Region IVA	1e-05	0.99999	trop1	japonica
113	PTRV312	PRRI000804	1070-B	5-070-Red	Red	BELIBOD NA PULA	Quezon	Calabarzon	Calabarzon	Region IVA	0.93554	0.06446	indx	Indica
114	PTRV317	PRRI000897	1432	mix(red and white)	mix (red and white)	DINULYAS	Quezon	Calabarzon	Calabarzon	Region IVA	0.99999	1e-05	ind1B	Indica
115	PTRV318	PRRI000899	1439	5-070-Red	Red	NAGSALAY	Quezon	Calabarzon	Calabarzon	Region IVA	1e-05	0.99999	trop1	japonica
116	PTRV504	-	12841	6-088-Variable purple	Variable purple	INIPOT-IBON / ININGKANTO	Quezon	Calabarzon	Calabarzon	Region IVA	1e-05	0.99999	trop1	japonica
117	PTRV512	-	12986	6-088-Variable purple	Variable purple	ININGKANTO	Quezon	Calabarzon	Calabarzon	Region IVA	1e-05	0.99999	trop1	japonica
118	15247	NA	NA	5-070-Red	Red	BUTWA BLACK	Rizal	Calabarzon	Calabarzon	Region IVA	0.014158	0.985842	trop1	japonica
119	15249	NA	NA	5-070-Red	Red	RENOMERO	Rizal	Calabarzon	Calabarzon	Region IVA	1e-05	0.99999	trop1	japonica
120	15258	NA	NA	5-070-Red	Red	BINISAYA	Rizal	Calabarzon	Calabarzon	Region IVA	1e-05	0.99999	trop1	japonica
121	PTRV324	PRRI001012	1358	5-070-Red	Red	DILAY	Abra	Cordillera Administrative Region	CAR	CAR	0.99999	1e-05	ind3	Indica
122	PTRV349	PRRI002311	1371	5-070-Red	Red	SANIP	Abra	Cordillera Administrative Region	CAR	CAR	0.99999	1e-05	ind3	Indica
123	PTRV152	PRRI003282	4051	5-070-Red	Red	DALUDO	Apayao	Cordillera Administrative Region	CAR	CAR	1e-05	0.99999	trop1	japonica
124	PTRV153	PRRI003284	4053	5-070-Red	Red	GALLIANO	Apayao	Cordillera Administrative Region	CAR	CAR	0.994689	0.005311	ind3	Indica
125	PTRV422	-	12159	5-070-Red	Red	BULILISING	Apayao	Cordillera Administrative Region	CAR	CAR	1e-05	0.99999	trop1	japonica
126	PTRV430	-	12207	5-070-Red	Red	SABADILLA	Apayao	Cordillera Administrative Region	CAR	CAR	1e-05	0.99999	trop1	japonica
127	PTRV116	PRRI007061	12358-A	5-070-Red	Red	LASBAKAN	Benguet	Cordillera Administrative Region	CAR	CAR	1e-05	0.99999	trop1	japonica
128	PTRV118	PRRI007044	12374	5-070-Red	Red	KALIPAO	Benguet	Cordillera Administrative Region	CAR	CAR	1e-05	0.99999	trop1	japonica
129	PTRV194	PRRI007062	12370-A	5-070-Red	Red	LASBAKAN	Benguet	Cordillera Administrative Region	CAR	CAR	1e-05	0.99999	trop1	japonica
130	PTRV22	PRRI003249	4008	5-070-Red	Red	SARUJAO	Benguet	Cordillera Administrative Region	CAR	CAR	0.99999	1e-05	ind3	Indica
131	PTRV222	PRRI000227	2210	5-070-Red	Red	EMMANG	Benguet	Cordillera Administrative Region	CAR	CAR	0.99999	1e-05	ind3	Indica
132	PTRV255	PRRI000394	2377	5-070-Red	Red	BANGKORO	Benguet	Cordillera Administrative Region	CAR	CAR	0.99999	1e-05	ind3	Indica
133	PTRV256	PRRI000400	2383	5-070-Red	Red	LANGKABAN (DIKET)	Benguet	Cordillera Administrative Region	CAR	CAR	0.99999	1e-05	ind3	Indica
134	PTRV257	PRRI000403	2386	5-070-Red	Red	SALANAY (GOPANG)	Benguet	Cordillera Administrative Region	CAR	CAR	0.99999	1e-05	ind3	Indica
135	PTRV268	PRRI000462	2445	5-070-Red	Red	TONING	Benguet	Cordillera Administrative Region	CAR	CAR	0.99999	1e-05	ind3	Indica
136	PTRV271	PRRI000485	2468	5-070-Red	Red	BAYABAS	Benguet	Cordillera Administrative Region	CAR	CAR	0.99999	1e-05	ind3	Indica
137	PTRV272	PRRI000491	2474	5-070-Red	Red	KANTING	Benguet	Cordillera Administrative Region	CAR	CAR	1e-05	0.99999	trop1	japonica
138	PTRV280	PRRI000528	2511	5-070-Red	Red	SHIKET-TOLING	Benguet	Cordillera Administrative Region	CAR	CAR	1e-05	0.99999	trop1	japonica
139	PTRV287	PRRI000550	2533	5-070-Red	Red	SAKIDEB	Benguet	Cordillera Administrative Region	CAR	CAR	1e-05	0.99999	trop1	japonica
140	PTRV288	PRRI000551	2534	5-070-Red	Red	SALANAY (SABBOL)	Benguet	Cordillera Administrative Region	CAR	CAR	1e-05	0.99999	trop1	japonica
141	PTRV290	PRRI000557	2540	5-070-Red	Red	MAROYAW	Benguet	Cordillera Administrative Region	CAR	CAR	0.99999	1e-05	ind3	Indica
142	PTRV291	PRRI000559	2542	5-070-Red	Red	EPIS (KINTOMAN)	Benguet	Cordillera Administrative Region	CAR	CAR	0.976492	0.023508	ind3	Indica
143	PTRV370	-	7567	5-070-Red	Red	SENEMAN (RED)	Benguet	Cordillera Administrative Region	CAR	CAR	1e-05	0.99999	trop1	japonica
144	PTRV388	-	11520	5-070-Red	Red	LUK-AB	Benguet	Cordillera Administrative Region	CAR	CAR	0.99999	1e-05	ind3	Indica
145	PTRV389	-	11535	5-070-Red	Red	BOTALGA	Benguet	Cordillera Administrative Region	CAR	CAR	0.99999	1e-05	ind3	Indica
146	PTRV390	-	11541	5-070-Red	Red	BATALGA	Benguet	Cordillera Administrative Region	CAR	CAR	0.99999	1e-05	ind3	Indica
147	PTRV391	-	11542	5-070-Red	Red	Talabtab	Benguet	Cordillera Administrative Region	CAR	CAR	0.99999	1e-05	ind3	Indica
148	PTRV411	-	12371-B	5-070-Red	Red	SABA	Benguet	Cordillera Administrative Region	CAR	CAR	1e-05	0.99999	trop1	japonica
149	PTRV418	-	12371-A	5-070-Red	Red	SABA	Benguet	Cordillera Administrative Region	CAR	CAR	1e-05	0.99999	trop1	japonica
150	PTRV452	-	12365	5-070-Red	Red	KALIPAGO	Benguet	Cordillera Administrative Region	CAR	CAR	1e-05	0.99999	trop1	japonica
151	PTRV453	-	12369	5-070-Red	Red	KABAL	Benguet	Cordillera Administrative Region	CAR	CAR	1e-05	0.99999	trop1	japonica
152	PTRV525	-	13355	5-070-Red	Red	BONGKITAN RED RICE	Benguet	Cordillera Administrative Region	CAR	CAR	0.119304	0.880696	trop1	japonica
153	PTRV526	-	13357	5-070-Red	Red	KALONG	Benguet	Cordillera Administrative Region	CAR	CAR	1e-05	0.99999	trop1	japonica
154	PTRV527	-	13358	5-070-Red	Red	MALATIKAN	Benguet	Cordillera Administrative Region	CAR	CAR	1e-05	0.99999	trop1	japonica
155	PTRV528	-	13359	5-070-Red	Red	MONGAY	Benguet	Cordillera Administrative Region	CAR	CAR	1e-05	0.99999	trop1	japonica
156	PTRV529	-	13361	5-070-Red	Red	SABANGAN	Benguet	Cordillera Administrative Region	CAR	CAR	0.99999	1e-05	ind3	Indica
157	PTRV530	-	13362	5-070-Red	Red	SHATAKAN TALON	Benguet	Cordillera Administrative Region	CAR	CAR	0.99999	1e-05	ind3	Indica
158	PTRV531	-	13363	5-070-Red	Red	BALASINGA (PALINA)	Benguet	Cordillera Administrative Region	CAR	CAR	1e-05	0.99999	trop1	japonica
159	PTRV532	-	13364	7-080-Purple	Purple	BALATINAW (NAPOENG)	Benguet	Cordillera Administrative Region	CAR	CAR	0.265194	0.734806	trop1	admix
160	PTRV533	-	13365	7-080-Purple	Purple	BALATINAW (PALINA)	Benguet	Cordillera Administrative Region	CAR	CAR	0.262971	0.737029	trop1	admix
161	PTRV534	-	13366	7-080-Purple	Purple	BALATINAW (TACADANG)	Benguet	Cordillera Administrative Region	CAR	CAR	0.265536	0.734464	trop1	admix
162	PTRV535	-	13370	5-070-Red	Red	KABOL	Benguet	Cordillera Administrative Region	CAR	CAR	1e-05	0.99999	trop1	japonica
163	PTRV536	-	13371	5-070-Red	Red	LASBACAN (RED RICE)	Benguet	Cordillera Administrative Region	CAR	CAR	1e-05	0.99999	trop1	japonica
164	PTRV537	-	13372	5-070-Red	Red	KANILING	Benguet	Cordillera Administrative Region	CAR	CAR	1e-05	0.99999	trop1	japonica
165	PTRV572	-	11524-A	5-070-Red	Red	BAYABAS (BROWN FURROWS)	Benguet	Cordillera Administrative Region	CAR	CAR	0.99999	1e-05	ind3	Indica
166	PTRV573	-	11543	5-070-Red	Red	RED RICE	Benguet	Cordillera Administrative Region	CAR	CAR	0.99999	1e-05	ind3	Indica
167	PTRV117	PRRI007059	7519	5-070-Red	Red	KINTUMAN (SABA)	Cordillera	Cordillera Administrative Region	CAR	CAR	0.547197	0.452803	admix	admix
168	PTRV158	PRRI003454	4278	5-070-Red	Red	BINUQQUK MUNDADALA (FI NOOK)	Cordillera	Cordillera Administrative Region	CAR	CAR	1e-05	0.99999	trop1	japonica
169	PTRV162	PRRI003691	4517	5-070-Red	Red	KUTUBE-N	Cordillera	Cordillera Administrative Region	CAR	CAR	1e-05	0.99999	trop1	japonica
170	PTRV163	PRRI003701	4527	5-070-Red	Red	LEGAGE-N	Cordillera	Cordillera Administrative Region	CAR	CAR	1e-05	0.99999	trop1	japonica
171	PTRV164	PRRI003791	4620	1-010-White	White	MENKARINKIN	Cordillera	Cordillera Administrative Region	CAR	CAR	1e-05	0.99999	trop1	japonica
172	PTRV167	PRRI003925	4754	5-070-Red	Red	PARAY KADAPUG	Cordillera	Cordillera Administrative Region	CAR	CAR	1e-05	0.99999	trop1	japonica
173	PTRV170	PRRI004294	5129	5-070-Red	Red	T. Q. QI. HINGLU	Cordillera	Cordillera Administrative Region	CAR	CAR	1e-05	0.99999	trop1	japonica
174	PTRV171	PRRI004296	5131	5-070-Red	Red	T. Q. QI. QIM. Q. MINANGAN	Cordillera	Cordillera Administrative Region	CAR	CAR	1e-05	0.99999	trop1	japonica
175	PTRV42	PRRI003472	4296	5-070-Red	Red	BUGEL	Cordillera	Cordillera Administrative Region	CAR	CAR	1e-05	0.99999	trop1	japonica
176	PTRV50	PRRI003675	4501	5-070-Red	Red	KOANTIYAN	Cordillera	Cordillera Administrative Region	CAR	CAR	0.634501	0.365499	admix	admix
177	PTRV52	PRRI003693	4519	5-070-Red	Red	LAKAYAN	Cordillera	Cordillera Administrative Region	CAR	CAR	1e-05	0.99999	trop1	japonica
178	PTRV53	PRRI003707	4533	6-088-Variable purple	Variable purple	LIBU	Cordillera	Cordillera Administrative Region	CAR	CAR	1e-05	0.99999	trop1	japonica
179	PTRV60	PRRI003864	4693	5-070-Red	Red	P. T. D. QIMBANIG	Cordillera	Cordillera Administrative Region	CAR	CAR	1e-05	0.99999	trop1	japonica
180	PTRV61	PRRI003869	4698	5-070-Red	Red	P. T. Q. D. Q. MALILOM	Cordillera	Cordillera Administrative Region	CAR	CAR	0.60905	0.39095	admix	admix
181	PTRV62	PRRI003875	4704	5-070-Red	Red	P. T. Q. QIM. Q. QIM. Q. MIN.	Cordillera	Cordillera Administrative Region	CAR	CAR	1e-05	0.99999	trop1	japonica
182	PTRV63	PRRI003887	4716	5-070-Red	Red	P. TINYAGEW DAYKET LAWILAWAN	Cordillera	Cordillera Administrative Region	CAR	CAR	1e-05	0.99999	trop1	japonica
183	PTRV64	PRRI003888	4717	5-070-Red	Red	P. TINYAGEW DAYKET LIKWET	Cordillera	Cordillera Administrative Region	CAR	CAR	1e-05	0.99999	trop1	japonica
184	PTRV65	PRRI003894	4723	5-070-Red	Red	P-PEY PUTAN MENNISAN	Cordillera	Cordillera Administrative Region	CAR	CAR	0.019299	0.980701	trop1	japonica
185	PTRV66	PRRI003906	4735	5-070-Red	Red	PALEY-PEY PUTAN KABEW	Cordillera	Cordillera Administrative Region	CAR	CAR	1e-05	0.99999	trop1	japonica
186	PTRV67	PRRI003916	4745	5-070-Red	Red	PARAY BINIBIQ	Cordillera	Cordillera Administrative Region	CAR	CAR	1e-05	0.99999	trop1	japonica
187	PTRV68	PRRI003917	4746	5-070-Red	Red	PARAY BUKANKAN	Cordillera	Cordillera Administrative Region	CAR	CAR	1e-05	0.99999	trop1	japonica
188	PTRV69	PRRI003922	4751	5-070-Red	Red	PARAY HAMUTAN MARARAQ	Cordillera	Cordillera Administrative Region	CAR	CAR	1e-05	0.99999	trop1	japonica
189	PTRV70	PRRI003932	4761	5-070-Red	Red	PARAY KINANDAH	Cordillera	Cordillera Administrative Region	CAR	CAR	0.017386	0.982614	trop1	japonica
190	PTRV71	PRRI003933	4762	5-070-Red	Red	PARAY KINARABAW	Cordillera	Cordillera Administrative Region	CAR	CAR	0.020717	0.979283	trop1	japonica
191	PTRV72	PRRI003934	4763	5-070-Red	Red	PARAY KINARATUN	Cordillera	Cordillera Administrative Region	CAR	CAR	1e-05	0.99999	trop1	japonica
192	PTRV73	PRRI003939	4768	5-070-Red	Red	PARAY KURALIS	Cordillera	Cordillera Administrative Region	CAR	CAR	1e-05	0.99999	trop1	japonica
193	PTRV75	PRRI004368	5203	5-070-Red	Red	INGNGOPPOR-TINAWON	Cordillera	Cordillera Administrative Region	CAR	CAR	0.99999	1e-05	indx	Indica
194	14246	NA	NA	5-070-Red	Red	PALAWAN _RED	Ifugao	Cordillera Administrative Region	CAR	CAR	1e-05	0.99999	trop1	japonica
195	14247	NA	NA	5-070-Red	Red	PALAWAN _WHITE	Ifugao	Cordillera Administrative Region	CAR	CAR	1e-05	0.99999	trop1	japonica
196	14250	NA	NA	5-070-Red	Red	DUMALENGAN	Ifugao	Cordillera Administrative Region	CAR	CAR	1e-05	0.99999	trop1	japonica
197	PTRV149	PRRI003237	3996	5-070-Red	Red	PINO	Ifugao	Cordillera Administrative Region	CAR	CAR	0.99999	1e-05	ind1B	Indica
198	PTRV151	PRRI003262	4022	5-070-Red	Red	WAKEN-DIKET	Ifugao	Cordillera Administrative Region	CAR	CAR	1e-05	0.99999	trop1	japonica
199	PTRV154	PRRI003290	4059	5-070-Red	Red	LINANGAN	Ifugao	Cordillera Administrative Region	CAR	CAR	0.99999	1e-05	ind3	Indica
200	PTRV159	PRRI003495	4319	5-070-Red	Red	CHUMI-I-TINAWON	Ifugao	Cordillera Administrative Region	CAR	CAR	1e-05	0.99999	trop1	japonica
201	PTRV161	PRRI003590	4415	5-070-Red	Red	IFUGAO RICE	Ifugao	Cordillera Administrative Region	CAR	CAR	1e-05	0.99999	trop1	japonica
202	PTRV325	PRRI001031	1853	6-088-Variable purple	Variable purple	NGODPON	Ifugao	Cordillera Administrative Region	CAR	CAR	1e-05	0.99999	trop1	japonica
203	PTRV351	PRRI002472	3879	6-088-Variable purple	Variable purple	BALLATINAO	Ifugao	Cordillera Administrative Region	CAR	CAR	1e-05	0.99999	trop1	japonica
204	PTRV374	-	10620	7-080-Purple	Purple	RED RICE	Ifugao	Cordillera Administrative Region	CAR	CAR	0.99999	1e-05	ind3	Indica
205	PTRV41	PRRI003459	4283	5-070-Red	Red	BIQLINAN	Ifugao	Cordillera Administrative Region	CAR	CAR	1e-05	0.99999	trop1	japonica
206	PTRV43	PRRI003591	4416	5-070-Red	Red	IFUGAO RICE	Ifugao	Cordillera Administrative Region	CAR	CAR	1e-05	0.99999	trop1	japonica
207	PTRV45	PRRI003593	4418	5-070-Red	Red	IFUGAO RICE	Ifugao	Cordillera Administrative Region	CAR	CAR	0.99999	1e-05	ind3	Indica
208	PTRV46	PRRI003601	4426	5-070-Red	Red	INCHOMAJAG-TINAWON	Ifugao	Cordillera Administrative Region	CAR	CAR	1e-05	0.99999	trop1	japonica
209	PTRV505	-	12855	1-010-White	White	IMBANIG	Ifugao	Cordillera Administrative Region	CAR	CAR	1e-05	0.99999	trop1	japonica
210	PTRV506	-	12856	5-070-Red	Red	GUMALENG	Ifugao	Cordillera Administrative Region	CAR	CAR	1e-05	0.99999	trop1	japonica
211	PTRV507	-	12862	5-070-Red	Red	MINA'ANG	Ifugao	Cordillera Administrative Region	CAR	CAR	0.99999	1e-05	ind3	Indica
212	PTRV508	-	12981	5-070-Red	Red	TINAWON-KAMANGA	Ifugao	Cordillera Administrative Region	CAR	CAR	1e-05	0.99999	trop1	japonica
213	PTRV509	-	12982	5-070-Red	Red	HINGLU	Ifugao	Cordillera Administrative Region	CAR	CAR	1e-05	0.99999	trop1	japonica
214	PTRV510	-	12983	7-080-Purple	Purple	BALATINAO	Ifugao	Cordillera Administrative Region	CAR	CAR	0.265194	0.734806	trop1	admix
215	PTRV511	-	12985	5-070-Red	Red	MINI-ANGAN	Ifugao	Cordillera Administrative Region	CAR	CAR	0.99999	1e-05	ind3	Indica
216	PTRV6	PRRI003158	3914	5-070-Red	Red	GUYOD	Ifugao	Cordillera Administrative Region	CAR	CAR	0.99999	1e-05	ind1B	Indica
217	14761	NA	NA	5-070-Red	Red	DUMALENGAN	Kalinga	Cordillera Administrative Region	CAR	CAR	1e-05	0.99999	trop1	japonica
218	PTRV111	PRRI007112	11230-B	5-070-Red	Red	TOKPAL (RED)	Kalinga	Cordillera Administrative Region	CAR	CAR	0.834505	0.165495	indx	Indica
219	PTRV135	PRRI006293	11174	5-070-Red	Red	UNOY _LACHOK	Kalinga	Cordillera Administrative Region	CAR	CAR	1e-05	0.99999	trop1	japonica
220	PTRV136	PRRI006291	11171	5-070-Red	Red	UNOY _IVUWAN	Kalinga	Cordillera Administrative Region	CAR	CAR	1e-05	0.99999	trop1	japonica
221	PTRV137	PRRI006271	11172	5-070-Red	Red	ULIKAN _RED	Kalinga	Cordillera Administrative Region	CAR	CAR	0.99999	1e-05	ind3	Indica
222	PTRV141	PRRI005978	11163-A	5-070-Red	Red	DIKET (RED)	Kalinga	Cordillera Administrative Region	CAR	CAR	1e-05	0.99999	trop1	japonica
223	PTRV182	PRRI006357	11196-B	5-070-Red	Red	KAMOROS (RED)	Kalinga	Cordillera Administrative Region	CAR	CAR	1e-05	0.99999	trop1	japonica
224	PTRV246	PRRI000378	2361	5-070-Red	Red	BUWA	Kalinga	Cordillera Administrative Region	CAR	CAR	1e-05	0.99999	trop1	japonica
225	PTRV267	PRRI000460	2443	5-070-Red	Red	BUWOO-WA	Kalinga	Cordillera Administrative Region	CAR	CAR	1e-05	0.99999	trop1	japonica
226	PTRV278	PRRI000524	2507	5-070-Red	Red	MOGGO	Kalinga	Cordillera Administrative Region	CAR	CAR	1e-05	0.99999	trop1	japonica
227	PTRV293	PRRI000574	2557	5-070-Red	Red	BOKAL	Kalinga	Cordillera Administrative Region	CAR	CAR	1e-05	0.99999	trop1	japonica
228	PTRV341	PRRI001883	198	5-070-Red	Red	ONUY (BA-EYAN)	Kalinga	Cordillera Administrative Region	CAR	CAR	1e-05	0.99999	trop1	japonica
229	PTRV384	PRRI006343	11134-A	5-070-Red	Red	TOLON(1)	Kalinga	Cordillera Administrative Region	CAR	CAR	1e-05	0.99999	trop1	japonica
230	PTRV385	PRRI006354	11182-A	5-070-Red	Red	PAYAGO	Kalinga	Cordillera Administrative Region	CAR	CAR	1e-05	0.99999	trop1	japonica
231	PTRV519	-	13336	5-070-Red	Red	BINUWAYA	Kalinga	Cordillera Administrative Region	CAR	CAR	0.99999	1e-05	ind3	Indica
232	PTRV520	-	13338	5-070-Red	Red	MIMIS	Kalinga	Cordillera Administrative Region	CAR	CAR	0.046214	0.953786	trop1	japonica
233	PTRV521	-	13340	5-070-Red	Red	VAIKAN JAYKOT	Kalinga	Cordillera Administrative Region	CAR	CAR	1e-05	0.99999	trop1	japonica
234	PTRV522	-	13341	5-070-Red	Red	BINANKO	Kalinga	Cordillera Administrative Region	CAR	CAR	0.99999	1e-05	ind3	Indica
235	PTRV523	-	13342	5-070-Red	Red	TUPPAL	Kalinga	Cordillera Administrative Region	CAR	CAR	0.065871	0.934129	trop1	japonica
236	PTRV524	-	13343	7-080-Purple	Purple	JUTINAO JAYKOT	Kalinga	Cordillera Administrative Region	CAR	CAR	0.262971	0.737029	trop1	admix
237	14253	NA	NA	5-070-Red	Red	PINILI	Mountain Province	Cordillera Administrative Region	CAR	CAR	1e-05	0.99999	trop1	japonica
238	PTRV17	PRRI007129	12146	5-070-Red	Red	KAYACHENG	Mountain Province	Cordillera Administrative Region	CAR	CAR	0.99999	1e-05	ind3	Indica
239	PTRV281	PRRI000530	2513	5-070-Red	Red	LI-TOT (RED DEKOT)	Mountain Province	Cordillera Administrative Region	CAR	CAR	1e-05	0.99999	trop1	japonica
240	PTRV387	-	11509	5-070-Red	Red	RED RICE (AROMATIC)	Mountain Province	Cordillera Administrative Region	CAR	CAR	0.99999	1e-05	ind3	Indica
241	PTRV420	-	12148	6-088-Variable purple	Variable purple	ENNGOP-POR	Mountain Province	Cordillera Administrative Region	CAR	CAR	1e-05	0.99999	trop1	japonica
242	PTRV121	PRRI007008	12379	6-088-Variable purple	Variable purple	BALATINAW	Benguet	Cordillera Administrative Region	CAR	CAR	0.265194	0.734806	trop1	admix
243	PTRV146	PRRI003115	3858	5-070-Red	Red	MAGETELENG	Mountain Province	Cordillera Administrative Region	CAR	CAR	1e-05	0.99999	trop1	japonica
244	PTRV120	PRRI007013	12349	6-088-Variable purple	Variable purple	BLACK RICE	Surigao del Sur	Caraga	Caraga	Region XIII	1e-05	0.99999	trop1	japonica
245	PTRV286	PRRI000548	2531	5-070-Red	Red	KATIBONG	Agusan Del Norte	Caraga	Caraga	Region XIII	0.997671	0.002329	ind3	Indica
246	PTRV518	-	13289	7-080-Purple	Purple	BLACK RICE	Agusan Del Norte	Caraga	Caraga	Region XIII	0.99999	1e-05	indx	Indica
247	PTRV112	PRRI007083	12331	5-070-Red	Red	PILIT TAPOL _LIGHT TO DARK	Agusan del Sur	Caraga	Caraga	Region XIII	0.057179	0.942821	trop1	japonica
248	PTRV113	PRRI007082	12328	7-080-Purple	Purple	PILIT TAPOL _DARK	Agusan del Sur	Caraga	Caraga	Region XIII	1e-05	0.99999	trop1	japonica
249	PTRV114	PRRI007081	12330	5-070-Red	Red	PILIT TAPOL	Agusan del Sur	Caraga	Caraga	Region XIII	1e-05	0.99999	trop1	japonica
250	PTRV115	PRRI007080	12329	7-080-Purple	Purple	PILIT TAPOL	Agusan del Sur	Caraga	Caraga	Region XIII	1e-05	0.99999	trop1	japonica
251	PTRV119	PRRI007019	12341	5-070-Red	Red	DINORADO	Agusan del Sur	Caraga	Caraga	Region XIII	0.999886	0.000114	ind3	Indica
252	PTRV34	PRRI003352	4127	5-070-Red	Red	LUBANG	Agusan del Sur	Caraga	Caraga	Region XIII	0.981844	0.018156	indx	Indica
253	PTRV440	-	12316	5-070-Red	Red	LUBANG KALABAW	Agusan del Sur	Caraga	Caraga	Region XIII	1e-05	0.99999	trop1	japonica
254	PTRV441	-	12319	5-070-Red	Red	DALAGANG BUKID	Agusan del Sur	Caraga	Caraga	Region XIII	0.99999	1e-05	indx	Indica
255	PTRV442	-	12321	5-070-Red	Red	RED B10	Agusan del Sur	Caraga	Caraga	Region XIII	0.99999	1e-05	indx	Indica
256	PTRV443	-	12332	5-070-Red	Red	SINAMAW	Agusan del Sur	Caraga	Caraga	Region XIII	0.033647	0.966353	trop1	japonica
257	PTRV444	-	12332	5-070-Red	Red	SINAMAW	Agusan del Sur	Caraga	Caraga	Region XIII	1e-05	0.99999	trop1	japonica
258	PTRV445	-	12335	6-088-Variable purple	Variable purple	MALAGKIT TAPOL	Agusan del Sur	Caraga	Caraga	Region XIII	1e-05	0.99999	trop1	japonica
259	PTRV446	-	12336	7-080-Purple	Purple	MALAGKIT TAPOL	Agusan del Sur	Caraga	Caraga	Region XIII	1e-05	0.99999	trop1	japonica
260	PTRV191	PRRI007014	12352	6-088-Variable purple	Variable purple	BLACK RICE	Surigao del Sur	Caraga	Caraga	Region XIII	0.99999	1e-05	indx	Indica
261	PTRV447	-	12348	mix(red and white)	mix (red and white)	SINAMPABLO	Surigao del Sur	Caraga	Caraga	Region XIII	1e-05	0.99999	trop1	japonica
262	PTRV448	-	12351	mix(red and variant purple)	mix (red and variant purple)	REMOLITES	Surigao del Sur	Caraga	Caraga	Region XIII	1e-05	0.99999	trop1	japonica
263	PTRV449	-	12353	1-010-White	White	DUMAP-OG	Surigao del Sur	Caraga	Caraga	Region XIII	1e-05	0.99999	trop1	japonica
264	PTRV450	-	12354	6-088-Variable purple	Variable purple	PILIT	Surigao del Sur	Caraga	Caraga	Region XIII	1e-05	0.99999	trop1	japonica
265	PTRV451	-	12355	5-070-Red	Red	SINAMPABLO	Surigao del Sur	Caraga	Caraga	Region XIII	1e-05	0.99999	trop1	japonica
266	PTRV55	PRRI003715	4541	5-070-Red	Red	LUBANG (RED)	Surigao del Sur	Caraga	Caraga	Region XIII	0.990687	0.009313	ind3	Indica
267	PTRV56	PRRI003729	4555	5-070-Red	Red	MALAGKIT	Surigao del Sur	Caraga	Caraga	Region XIII	0.99999	1e-05	ind3	Indica
268	PTRV184	PRRI006361	5901	5-070-Red	Red	BINISAYA	Aurora	Central Luzon	Central Luzon	Region III	1e-05	0.99999	trop1	japonica
269	12746	NA	NA	5-070-Red	Red	GALO	Aurora	Central Luzon	Central Luzon	Region III	1e-05	0.99999	trop1	japonica
270	14259	NA	NA	NA	NA	NA	Aurora	Central Luzon	Central Luzon	Region III	1e-05	0.99999	trop1	japonica
271	14279	NA	NA	NA	NA	NA	Aurora	Central Luzon	Central Luzon	Region III	1e-05	0.99999	trop1	japonica
272	PTRV102	PRRI005802	10809	6-088-Variable purple	Variable purple	GALO	Aurora	Central Luzon	Central Luzon	Region III	1e-05	0.99999	trop1	japonica
273	PTRV103	PRRI005867	10857	5-070-Red	Red	KINAKAW	Aurora	Central Luzon	Central Luzon	Region III	1e-05	0.99999	trop1	japonica
274	PTRV108	PRRI005893	10844	5-070-Red	Red	MININDORO (PULA)	Aurora	Central Luzon	Central Luzon	Region III	1e-05	0.99999	trop1	japonica
275	PTRV122	PRRI006821	7181	5-070-Red	Red	RED RICE (MIXTURE FROM HINUMAY)	Aurora	Central Luzon	Central Luzon	Region III	0.99999	1e-05	indx	Indica
276	PTRV126	PRRI006527	6211	6-088-Variable purple	Variable purple	LUBAG	Aurora	Central Luzon	Central Luzon	Region III	1e-05	0.99999	trop1	japonica
277	PTRV128	PRRI006463	6013	6-088-Variable purple	Variable purple	GALO	Aurora	Central Luzon	Central Luzon	Region III	1e-05	0.99999	trop1	japonica
278	PTRV140	PRRI006187	6245	1-010-White	White	MINANTIKA	Aurora	Central Luzon	Central Luzon	Region III	1e-05	0.99999	trop1	japonica
279	PTRV144	PRRI005917	10876	6-088-Variable purple	Variable purple	PIRURUTONG	Aurora	Central Luzon	Central Luzon	Region III	1e-05	0.99999	trop1	japonica
280	PTRV173	PRRI005876	10843-A	6-088-Variable purple	Variable purple	LUBAG / GALO (RED)	Aurora	Central Luzon	Central Luzon	Region III	1e-05	0.99999	trop1	japonica
281	PTRV174	PRRI005882	10845-A	7-080-Purple	Purple	MALAGKIT-ITIM	Aurora	Central Luzon	Central Luzon	Region III	1e-05	0.99999	trop1	japonica
282	PTRV175	PRRI005884	10847	7-080-Purple	Purple	MALAGKIT-ITIM	Aurora	Central Luzon	Central Luzon	Region III	1e-05	0.99999	trop1	japonica
283	PTRV181	PRRI006314	7434	5-070-Red	Red	UNKNOWN QUIRINO GLUTINOUS RICE	Aurora	Central Luzon	Central Luzon	Region III	1e-05	0.99999	trop1	japonica
284	PTRV183	PRRI006337	10848	5-070-Red	Red	PALAWAN	Aurora	Central Luzon	Central Luzon	Region III	1e-05	0.99999	trop1	japonica
285	PTRV186	PRRI006378	6365	7-080-Purple	Purple	PARIRUTONG	Aurora	Central Luzon	Central Luzon	Region III	0.99999	1e-05	indx	Indica
286	PTRV190	PRRI006519	6127	5-070-Red	Red	KAMBAL	Aurora	Central Luzon	Central Luzon	Region III	1e-05	0.99999	trop1	japonica
287	PTRV375	-	10813	6-088-Variable purple	Variable purple	GALO (MALAGKIT)	Aurora	Central Luzon	Central Luzon	Region III	1e-05	0.99999	trop1	japonica
288	PTRV376	-	10826	5-070-Red	Red	BINISAYA	Aurora	Central Luzon	Central Luzon	Region III	1e-05	0.99999	trop1	japonica
289	PTRV377	-	10835	7-080-Purple	Purple	GALO (MALAGKIT)	Aurora	Central Luzon	Central Luzon	Region III	1e-05	0.99999	trop1	japonica
290	PTRV378	-	10837	5-070-Red	Red	KIPIL	Aurora	Central Luzon	Central Luzon	Region III	1e-05	0.99999	trop1	japonica
291	PTRV379	-	10850	7-080-Purple	Purple	LUBAG (MALAGKIT)	Aurora	Central Luzon	Central Luzon	Region III	1e-05	0.99999	trop1	japonica
292	PTRV380	-	10862	6-088-Variable purple	Variable purple	GALO	Aurora	Central Luzon	Central Luzon	Region III	1e-05	0.99999	trop1	japonica
293	PTRV381	-	10864	4-050-Brown	Brown	BINISAYA	Aurora	Central Luzon	Central Luzon	Region III	1e-05	0.99999	trop1	japonica
294	PTRV382	-	10870	6-088-Variable purple	Variable purple	GALO	Aurora	Central Luzon	Central Luzon	Region III	1e-05	0.99999	trop1	japonica
295	PTRV433	-	12239	mix(red and white)	mix (red and white)	BINIKOL / PINILIK	Aurora	Central Luzon	Central Luzon	Region III	1e-05	0.99999	trop1	japonica
296	PTRV434	-	12240	5-070-Red	Red	BINISAYA	Aurora	Central Luzon	Central Luzon	Region III	1e-05	0.99999	trop1	japonica
297	PTRV435	-	12241	6-088-Variable purple	Variable purple	GALO-MAPUSYAW	Aurora	Central Luzon	Central Luzon	Region III	1e-05	0.99999	trop1	japonica
298	PTRV436	-	12242	6-088-Variable purple	Variable purple	GALO	Aurora	Central Luzon	Central Luzon	Region III	1e-05	0.99999	trop1	japonica
299	PTRV467	-	12662	7-080-Purple	Purple	PIRURUTONG	Aurora	Central Luzon	Central Luzon	Region III	1e-05	0.99999	trop1	japonica
300	PTRV468	-	12671	7-080-Purple	Purple	MALAGKIT NA ITIM	Aurora	Central Luzon	Central Luzon	Region III	1e-05	0.99999	trop1	japonica
301	PTRV469	-	12672	5-070-Red	Red	MALAGKIT NA PUTI	Aurora	Central Luzon	Central Luzon	Region III	1e-05	0.99999	trop1	japonica
302	PTRV477	-	12709	7-080-Purple	Purple	BALATINAW	Aurora	Central Luzon	Central Luzon	Region III	1e-05	0.99999	trop1	japonica
303	PTRV478	-	12710	6-088-Variable purple	Variable purple	GALO	Aurora	Central Luzon	Central Luzon	Region III	1e-05	0.99999	trop1	japonica
304	PTRV479	-	12716	5-070-Red	Red	AGSUHAY	Aurora	Central Luzon	Central Luzon	Region III	1e-05	0.99999	trop1	japonica
305	PTRV487	-	12732	6-088-Variable purple	Variable purple	GALO (GASPANG)	Aurora	Central Luzon	Central Luzon	Region III	1e-05	0.99999	trop1	japonica
306	PTRV488	-	12733	6-088-Variable purple	Variable purple	GALO (PINO)	Aurora	Central Luzon	Central Luzon	Region III	1e-05	0.99999	trop1	japonica
307	PTRV489	-	12735	7-080-Purple	Purple	MULAWIN	Aurora	Central Luzon	Central Luzon	Region III	1e-05	0.99999	trop1	japonica
308	PTRV490	-	12737	6-088-Variable purple	Variable purple	GALO (PINO)	Aurora	Central Luzon	Central Luzon	Region III	1e-05	0.99999	trop1	japonica
309	PTRV491	-	12739	6-088-Variable purple	Variable purple	GALO (PINO)	Aurora	Central Luzon	Central Luzon	Region III	0.497478	0.502522	admix	admix
310	PTRV492	-	12740	7-080-Purple	Purple	GALO (GASPANG)	Aurora	Central Luzon	Central Luzon	Region III	1e-05	0.99999	trop1	japonica
311	PTRV493	-	12742	7-080-Purple	Purple	GALO (LUBANG/ MALAGKIT)	Aurora	Central Luzon	Central Luzon	Region III	1e-05	0.99999	trop1	japonica
312	PTRV494	-	12743	6-088-Variable purple	Variable purple	MALAGKIT (NO NAME)	Aurora	Central Luzon	Central Luzon	Region III	0.99999	1e-05	indx	Indica
313	PTRV495	-	12744	6-088-Variable purple	Variable purple	GALO	Aurora	Central Luzon	Central Luzon	Region III	1e-05	0.99999	trop1	japonica
314	PTRV496	-	12745	6-088-Variable purple	Variable purple	GALO	Aurora	Central Luzon	Central Luzon	Region III	1e-05	0.99999	trop1	japonica
315	PTRV497	-	12746	6-088-Variable purple	Variable purple	GALO	Aurora	Central Luzon	Central Luzon	Region III	1e-05	0.99999	trop1	japonica
316	PTRV498	-	12750	5-070-Red	Red	RED RICE (FROM VISCAYA)	Aurora	Central Luzon	Central Luzon	Region III	0.975071	0.024929	indx	Indica
317	PTRV499	-	12752	6-088-Variable purple	Variable purple	GALO	Aurora	Central Luzon	Central Luzon	Region III	1e-05	0.99999	trop1	japonica
318	PTRV500	-	12753	5-070-Red	Red	MAGSUHAY	Aurora	Central Luzon	Central Luzon	Region III	1e-05	0.99999	trop1	japonica
319	PTRV501	-	12755	5-070-Red	Red	KAMUROS	Aurora	Central Luzon	Central Luzon	Region III	1e-05	0.99999	trop1	japonica
320	PTRV545	-	13500	7-080-Purple	Purple	BALLATINAW-PINPINTA	Aurora	Central Luzon	Central Luzon	Region III	0.265536	0.734464	trop1	admix
321	PTRV546	-	13501	5-070-Red	Red	SINELAT	Aurora	Central Luzon	Central Luzon	Region III	1e-05	0.99999	trop1	japonica
322	PTRV547	-	13567	5-070-Red	Red	DINORADO	Aurora	Central Luzon	Central Luzon	Region III	1e-05	0.99999	trop1	japonica
323	PTRV548	-	13576	5-070-Red	Red	ISIC PUGOT	Aurora	Central Luzon	Central Luzon	Region III	1e-05	0.99999	trop1	japonica
324	PTRV568	-	10846-A	1-010-White	White	PALAWAN	Aurora	Central Luzon	Central Luzon	Region III	1e-05	0.99999	trop1	japonica
325	PTRV569	-	10867-A	6-088-Variable purple	Variable purple	GALO (MALAGKIT)	Aurora	Central Luzon	Central Luzon	Region III	1e-05	0.99999	trop1	japonica
326	12678	NA	NA	5-070-Red	Red	BRILLANTE	Bulacan	Central Luzon	Central Luzon	Region III	1e-05	0.99999	trop1	japonica
327	12679-B	NA	NA	5-070-Red	Red	BINERNAL WHITE	Bulacan	Central Luzon	Central Luzon	Region III	0.99999	1e-05	indx	Indica
328	PTRV470	-	12675	5-070-Red	Red	PULANG BALAT	Bulacan	Central Luzon	Central Luzon	Region III	1e-05	0.99999	trop1	japonica
329	PTRV471	-	12675	5-070-Red	Red	PULANG BALAT	Bulacan	Central Luzon	Central Luzon	Region III	1e-05	0.99999	trop1	japonica
330	PTRV472	-	12677	5-070-Red	Red	BINERNAL RED	Bulacan	Central Luzon	Central Luzon	Region III	1e-05	0.99999	trop1	japonica
331	PTRV473	-	12678	5-070-Red	Red	BRILLANTE	Bulacan	Central Luzon	Central Luzon	Region III	1e-05	0.99999	trop1	japonica
332	PTRV474	-	12679	5-070-Red	Red	BINERNAL WHITE	Bulacan	Central Luzon	Central Luzon	Region III	0.99999	1e-05	indx	Indica
333	14258	NA	NA	NA	NA	NA	Nueva Ecija	Central Luzon	Central Luzon	Region III	1e-05	0.99999	trop1	japonica
334	PTRV196	PRRI000008	1991	5-070-Red	Red	AGLIPAY	Nueva Ecija	Central Luzon	Central Luzon	Region III	0.99999	1e-05	ind3	Indica
335	PTRV200	PRRI000077	670 / 2060	5-070-Red	Red	ESMIS-ISMIS	Nueva Ecija	Central Luzon	Central Luzon	Region III	0.99999	1e-05	ind3	Indica
336	PTRV201	PRRI000084	2067	5-070-Red	Red	SALUGANUM	Nueva Ecija	Central Luzon	Central Luzon	Region III	0.969022	0.030978	ind3	Indica
337	PTRV216	PRRI000174	2157	5-070-Red	Red	MACAN PULOT	Nueva Ecija	Central Luzon	Central Luzon	Region III	0.99999	1e-05	indx	Indica
338	PTRV217	PRRI000178	2161	5-070-Red	Red	CAPUROY	Nueva Ecija	Central Luzon	Central Luzon	Region III	0.99999	1e-05	ind3	Indica
339	PTRV223	PRRI000239	2222	5-070-Red	Red	KALABAO	Nueva Ecija	Central Luzon	Central Luzon	Region III	0.99999	1e-05	ind3	Indica
340	PTRV224	PRRI000243	2226	5-070-Red	Red	MAGUETAY	Nueva Ecija	Central Luzon	Central Luzon	Region III	0.99999	1e-05	ind3	Indica
341	PTRV264	PRRI000433	2416	5-070-Red	Red	GUINAYANGANG	Nueva Ecija	Central Luzon	Central Luzon	Region III	0.536459	0.463541	admix	admix
342	PTRV270	PRRI000475	2458	5-070-Red	Red	CARIOSA (RED)	Nueva Ecija	Central Luzon	Central Luzon	Region III	0.99999	1e-05	ind3	Indica
343	PTRV283	PRRI000538	2521	5-070-Red	Red	IMPUHA	Nueva Ecija	Central Luzon	Central Luzon	Region III	0.278097	0.721903	temp	admix
344	PTRV432	-	12235	6-088-Variable purple	Variable purple	GALO	Nueva Ecija	Central Luzon	Central Luzon	Region III	1e-05	0.99999	trop1	japonica
345	PTRV437	-	12244	6-088-Variable purple	Variable purple	GALO	Nueva Ecija	Central Luzon	Central Luzon	Region III	1e-05	0.99999	trop1	japonica
346	PTRV571	-	11197	5-070-Red	Red	PALAWAN	Nueva Ecija	Central Luzon	Central Luzon	Region III	0.99999	1e-05	indx	Indica
347	PTRV576	PRRI000008	1991	5-070-Red	Red	AGLIPAY	Nueva Ecija	Central Luzon	Central Luzon	Region III	0.99999	1e-05	ind3	Indica
348	PTRV580	PRRI000077	670 / 2060	5-070-Red	Red	ESMIS-ISMIS	Nueva Ecija	Central Luzon	Central Luzon	Region III	0.99999	1e-05	ind3	Indica
349	PTRV581	PRRI000084	2067	5-070-Red	Red	SALUGANUM	Nueva Ecija	Central Luzon	Central Luzon	Region III	0.930241	0.069759	ind3	Indica
350	13914-C	NA	NA	NA	NA	NA	Tarlac	Central Luzon	Central Luzon	Region III	1e-05	0.99999	trop1	japonica
351	PTRV431	-	12230	6-088-Variable purple	Variable purple	BLACK RICE	Tarlac	Central Luzon	Central Luzon	Region III	1e-05	0.99999	trop1	japonica
352	15250	NA	NA	5-070-Red	Red	KALIBO	Zambales	Central Luzon	Central Luzon	Region III	1e-05	0.99999	trop1	japonica
353	15259	NA	NA	5-070-Red	Red	BINUNDOK	Zambales	Central Luzon	Central Luzon	Region III	0.99999	1e-05	indx	Indica
354	15260	NA	NA	5-070-Red	Red	PINILISA	Zambales	Central Luzon	Central Luzon	Region III	1e-05	0.99999	trop1	japonica
355	15602	NA	NA	5-070-Red	Red	GALO	Zambales	Central Luzon	Central Luzon	Region III	1e-05	0.99999	trop1	japonica
356	15603	NA	NA	5-070-Red	Red	AMAYAN	Zambales	Central Luzon	Central Luzon	Region III	1e-05	0.99999	trop1	japonica
357	PTRV465	-	12658	7-080-Purple	Purple	BATOLINAW	Zambales	Central Luzon	Central Luzon	Region III	0.99999	1e-05	indx	Indica
358	PTRV466	-	12659	5-070-Red	Red	KINAMPANYA	Zambales	Central Luzon	Central Luzon	Region III	1e-05	0.99999	trop1	japonica
359	PTRV90	PRRI005703	10945	6-088-Variable purple	Variable purple	BALATINAW	Zambales	Central Luzon	Central Luzon	Region III	1e-05	0.99999	trop1	japonica
360	15252	NA	NA	5-070-Red	Red	LUBANG	Bohol	Central Visayas	Central Visayas	Region VII	0.99999	1e-05	indx	Indica
361	15261	NA	NA	5-070-Red	Red	LUBANG	Bohol	Central Visayas	Central Visayas	Region VII	0.99999	1e-05	indx	Indica
362	PTRV199	PRRI000065	2048	5-070-Red	Red	KASAYA	Bohol	Central Visayas	Central Visayas	Region VII	0.99999	1e-05	ind3	Indica
363	PTRV29	PRRI003288	4057	5-070-Red	Red	KUTSIYAM	Bohol	Central Visayas	Central Visayas	Region VII	0.99999	1e-05	ind3	Indica
364	PTRV579	PRRI000065	2048	5-070-Red	Red	KASAYA	Bohol	Central Visayas	Central Visayas	Region VII	0.99999	1e-05	ind3	Indica
365	15644	NA	NA	5-070-Red	Red	RED LUBANG	Negros Oriental	Central Visayas	Central Visayas	Region VII	0.99999	1e-05	ind3	Indica
366	PTRV25	PRRI003276	4045	5-070-Red	Red	CATOR-OG RED	Negros Oriental	Central Visayas	Central Visayas	Region VII	0.976837	0.023163	indx	Indica
367	PTRV26	PRRI003279	4048	5-070-Red	Red	COTSIAN (RED)	Negros Oriental	Central Visayas	Central Visayas	Region VII	0.99999	1e-05	indx	Indica
368	15646	NA	NA	5-070-Red	Red	CANADA	Siquijor	Central Visayas	Central Visayas	Region VII	1e-05	0.99999	trop1	japonica
369	PTRV220	PRRI000222	2205	7-080-Purple	Purple	TAPOLE	Davao Del Norte	Davao Region	Davao Region	Region XI	1e-05	0.99999	trop1	japonica
370	15251	NA	NA	5-070-Red	Red	BATIOKAN	Davao del Sur	Davao Region	Davao Region	Region XI	1e-05	0.99999	trop1	japonica
371	15382	NA	NA	5-070-Red	Red	LIBO-LIBO	Davao Oriental	Davao Region	Davao Region	Region XI	1e-05	0.99999	trop1	japonica
372	15383	NA	NA	5-070-Red	Red	REMOLITIS	Davao Oriental	Davao Region	Davao Region	Region XI	1e-05	0.99999	trop1	japonica
373	PTRV353	PRRI002600	787	5-070-Red	Red	KARUMBA	Eastern Samar	Eastern Visayas	Eastern Visayas	Region VIII	1e-05	0.99999	trop1	japonica
374	PTRV578	PRRI000063	2046	5-070-Red	Red	CALAMBI	Eastern Samar	Eastern Visayas	Eastern Visayas	Region VIII	0.99999	1e-05	ind3	Indica
375	PTRV198	PRRI000063	2046	5-070-Red	Red	CALAMBI	Eastern Samar	Eastern Visayas	Eastern Visayas	Region VIII	0.99999	1e-05	ind3	Indica
376	PTRV326	PRRI001034	1857	5-070-Red	Red	BAKSALAN (KAWALWAL)	Eastern Samar	Eastern Visayas	Eastern Visayas	Region VIII	0.99999	1e-05	ind3	Indica
377	PTRV31	PRRI003320	4091	5-070-Red	Red	MOLAN-AY	Leyte	Eastern Visayas	Eastern Visayas	Region VIII	0.99999	1e-05	ind3	Indica
378	PTRV33	PRRI003331	4104	1-010-White	White	BOLIBOD (PUTI)	Leyte	Eastern Visayas	Eastern Visayas	Region VIII	0.99999	1e-05	indx	Indica
379	PTRV461	-	12638	5-070-Red	Red	CALINAYAN M	Leyte	Eastern Visayas	Eastern Visayas	Region VIII	0.598673	0.401327	admix	admix
380	15381	NA	NA	5-070-Red	Red	HINOMAY	Northern Samar	Eastern Visayas	Eastern Visayas	Region VIII	1e-05	0.99999	trop1	japonica
381	12382	NA	NA	5-070-Red	Red	KALINAYAN _BULAWANON	Samar	Eastern Visayas	Eastern Visayas	Region VIII	1e-05	0.99999	trop1	japonica
382	12383	NA	NA	5-070-Red	Red	KALINAYAN _MONOS	Samar	Eastern Visayas	Eastern Visayas	Region VIII	1e-05	0.99999	trop1	japonica
383	PTRV110	PRRI007120	12381	5-070-Red	Red	BAYSILANON	Samar	Eastern Visayas	Eastern Visayas	Region VIII	1e-05	0.99999	trop1	japonica
384	PTRV192	PRRI007041	12382	5-070-Red	Red	KALINAYAN BULAWANON	Samar	Eastern Visayas	Eastern Visayas	Region VIII	1e-05	0.99999	trop1	japonica
385	PTRV193	PRRI007042	12383	5-070-Red	Red	KALINAYAN MONOS	Samar	Eastern Visayas	Eastern Visayas	Region VIII	1e-05	0.99999	trop1	japonica
386	PTRV109	PRRI003215	3973	5-070-Red	Red	MALUA-IT	Ilocos Norte	Ilocos Region	Ilocos Region	Region I	1e-05	0.99999	trop1	japonica
387	PTRV13	PRRI003212	3970	5-070-Red	Red	MALIKET	Ilocos Norte	Ilocos Region	Ilocos Region	Region I	1e-05	0.99999	trop1	japonica
388	PTRV134	PRRI006304	7595	5-070-Red	Red	WARAYWAY	Ilocos Norte	Ilocos Region	Ilocos Region	Region I	1e-05	0.99999	trop1	japonica
389	PTRV14	PRRI003213	3971	5-070-Red	Red	MALIKET	Ilocos Norte	Ilocos Region	Ilocos Region	Region I	1e-05	0.99999	trop1	japonica
390	PTRV15	PRRI003214	3972	5-070-Red	Red	MALIKET	Ilocos Norte	Ilocos Region	Ilocos Region	Region I	1e-05	0.99999	trop1	japonica
391	PTRV179	PRRI006175	7540	5-070-Red	Red	MAUPAY	Ilocos Norte	Ilocos Region	Ilocos Region	Region I	1e-05	0.99999	trop1	japonica
392	PTRV219	PRRI000187	2170	5-070-Red	Red	CAVITENIA	Ilocos Norte	Ilocos Region	Ilocos Region	Region I	0.99999	1e-05	ind3	Indica
393	PTRV225	PRRI000257	2240	5-070-Red	Red	BENGALA	Ilocos Norte	Ilocos Region	Ilocos Region	Region I	0.99999	1e-05	ind3	Indica
394	PTRV228	PRRI000274	2257	5-070-Red	Red	CAVITEÑA	Ilocos Norte	Ilocos Region	Ilocos Region	Region I	0.99999	1e-05	ind3	Indica
395	PTRV232	PRRI000296	2279	5-070-Red	Red	KATLON BULAN	Ilocos Norte	Ilocos Region	Ilocos Region	Region I	0.99999	1e-05	indx	Indica
396	PTRV236	PRRI000308	497 / 2291	5-070-Red	Red	MAKABIAG	Ilocos Norte	Ilocos Region	Ilocos Region	Region I	0.99999	1e-05	ind3	Indica
397	PTRV237	PRRI000311	2294	5-070-Red	Red	MALIKET	Ilocos Norte	Ilocos Region	Ilocos Region	Region I	1e-05	0.99999	trop1	japonica
398	PTRV238	PRRI000322	2305	5-070-Red	Red	MOTIT MOTIT	Ilocos Norte	Ilocos Region	Ilocos Region	Region I	0.984116	0.015884	ind3	Indica
399	PTRV240	PRRI000343	2326	5-070-Red	Red	SABINTAR	Ilocos Norte	Ilocos Region	Ilocos Region	Region I	0.99999	1e-05	ind3	Indica
400	PTRV242	PRRI000361	2344	5-070-Red	Red	TADIOK	Ilocos Norte	Ilocos Region	Ilocos Region	Region I	0.99999	1e-05	ind3	Indica
401	PTRV243	PRRI000363	2346	5-070-Red	Red	TODYOK	Ilocos Norte	Ilocos Region	Ilocos Region	Region I	0.99999	1e-05	ind3	Indica
402	PTRV244	PRRI000365	2348	5-070-Red	Red	TUF (GALLANO)	Ilocos Norte	Ilocos Region	Ilocos Region	Region I	0.99999	1e-05	ind3	Indica
403	PTRV274	PRRI000505	2488	5-070-Red	Red	KATAY	Ilocos Norte	Ilocos Region	Ilocos Region	Region I	1e-05	0.99999	trop1	japonica
404	PTRV275	PRRI000519	2502	5-070-Red	Red	RED LUMINOS	Ilocos Norte	Ilocos Region	Ilocos Region	Region I	0.99999	1e-05	ind3	Indica
405	PTRV285	PRRI000547	2530	5-070-Red	Red	TUKON-TUKOD	Ilocos Norte	Ilocos Region	Ilocos Region	Region I	0.99999	1e-05	ind3	Indica
406	PTRV292	PRRI000563	2546	5-070-Red	Red	AMBUL	Ilocos Norte	Ilocos Region	Ilocos Region	Region I	0.99999	1e-05	ind3	Indica
407	PTRV335	PRRI001799	286	5-070-Red	Red	SANG-LAYA	Ilocos Norte	Ilocos Region	Ilocos Region	Region I	0.99999	1e-05	indx	Indica
408	PTRV367	-	5885	5-070-Red	Red	BALASANG	Ilocos Norte	Ilocos Region	Ilocos Region	Region I	1e-05	0.99999	trop1	japonica
409	PTRV368	-	6070	5-070-Red	Red	IMON-IMON	Ilocos Norte	Ilocos Region	Ilocos Region	Region I	1e-05	0.99999	trop1	japonica
410	PTRV4	PRRI003130	3885	5-070-Red	Red	BINALASANG	Ilocos Norte	Ilocos Region	Ilocos Region	Region I	0.99999	1e-05	ind3	Indica
411	PTRV416	-	12057	5-070-Red	Red	MALIKET GLUTINOUS	Ilocos Norte	Ilocos Region	Ilocos Region	Region I	1e-05	0.99999	trop1	japonica
412	PTRV417	-	12060	5-070-Red	Red	MALUIT	Ilocos Norte	Ilocos Region	Ilocos Region	Region I	1e-05	0.99999	trop1	japonica
413	PTRV419	-	12066	5-070-Red	Red	PARINA GLUTINOUS	Ilocos Norte	Ilocos Region	Ilocos Region	Region I	1e-05	0.99999	trop1	japonica
414	PTRV421	-	12155	5-070-Red	Red	GANNAL	Ilocos Norte	Ilocos Region	Ilocos Region	Region I	1e-05	0.99999	trop1	japonica
415	PTRV423	-	12194	5-070-Red	Red	MALAGKIT	Ilocos Norte	Ilocos Region	Ilocos Region	Region I	1e-05	0.99999	trop1	japonica
416	PTRV7	PRRI003180	3937	5-070-Red	Red	KARABKAB (MALIKET)	Ilocos Norte	Ilocos Region	Ilocos Region	Region I	0.99999	1e-05	ind1B	Indica
417	12780-0	NA	NA	NA	NA	NA	Ilocos Sur	Ilocos Region	Ilocos Region	Region I	0.017094	0.982906	trop1	japonica
418	PTRV16	PRRI003225	3984	5-070-Red	Red	MINANOK	Ilocos Sur	Ilocos Region	Ilocos Region	Region I	1e-05	0.99999	trop1	japonica
419	PTRV172	PRRI005644	6215	5-070-Red	Red	MACARANIAG	Ilocos Sur	Ilocos Region	Ilocos Region	Region I	0.99999	1e-05	ind3	Indica
420	PTRV230	PRRI000293	2276	5-070-Red	Red	ISLA	Ilocos Sur	Ilocos Region	Ilocos Region	Region I	0.99999	1e-05	ind3	Indica
421	PTRV233	PRRI000298	2281	5-070-Red	Red	KINASTILA	Ilocos Sur	Ilocos Region	Ilocos Region	Region I	0.99999	1e-05	ind3	Indica
422	PTRV24	PRRI003261	4021	5-070-Red	Red	WAGWAG RAOIS	Ilocos Sur	Ilocos Region	Ilocos Region	Region I	0.99999	1e-05	ind1B	Indica
423	PTRV265	PRRI000458	2441	5-070-Red	Red	WARAY-WARAY	Ilocos Sur	Ilocos Region	Ilocos Region	Region I	0.99999	1e-05	ind3	Indica
424	PTRV284	PRRI000544	2527	5-070-Red	Red	PAGAY PUGOT	Ilocos Sur	Ilocos Region	Ilocos Region	Region I	1e-05	0.99999	trop1	japonica
425	PTRV336	PRRI001845	51	5-070-Red	Red	PAGAY-UMA (MALUIT)	Ilocos Sur	Ilocos Region	Ilocos Region	Region I	1e-05	0.99999	trop1	japonica
426	PTRV412	-	11954	5-070-Red	Red	RED RICE	Ilocos Sur	Ilocos Region	Ilocos Region	Region I	0.837395	0.162605	indx	Indica
427	PTRV413	-	11964	5-070-Red	Red	RED RICE (PURPLE TIP)	Ilocos Sur	Ilocos Region	Ilocos Region	Region I	0.99999	1e-05	ind3	Indica
428	PTRV414	-	11966	7-080-Purple	Purple	BALATINAW	Ilocos Sur	Ilocos Region	Ilocos Region	Region I	0.99999	1e-05	indx	Indica
429	PTRV415	-	11967	6-088-Variable purple	Variable purple	BLACK DIKET	Ilocos Sur	Ilocos Region	Ilocos Region	Region I	0.99999	1e-05	indx	Indica
430	PTRV424	-	12197	5-070-Red	Red	BUKUTAN	Ilocos Sur	Ilocos Region	Ilocos Region	Region I	1e-05	0.99999	trop1	japonica
431	PTRV425	-	12198	5-070-Red	Red	LAMPADAN	Ilocos Sur	Ilocos Region	Ilocos Region	Region I	1e-05	0.99999	trop1	japonica
432	PTRV426	-	12199	5-070-Red	Red	LAMPADAN	Ilocos Sur	Ilocos Region	Ilocos Region	Region I	1e-05	0.99999	trop1	japonica
433	PTRV427	-	12200	5-070-Red	Red	LUKDIT NI ABALAYAN	Ilocos Sur	Ilocos Region	Ilocos Region	Region I	1e-05	0.99999	trop1	japonica
434	PTRV428	-	12201	5-070-Red	Red	MALAPAY	Ilocos Sur	Ilocos Region	Ilocos Region	Region I	1e-05	0.99999	trop1	japonica
435	PTRV429	-	12205	5-070-Red	Red	TAGALING	Ilocos Sur	Ilocos Region	Ilocos Region	Region I	1e-05	0.99999	trop1	japonica
436	PTRV12	PRRI003201	3959	5-070-Red	Red	MABULO	La Union	Ilocos Region	Ilocos Region	Region I	0.99999	1e-05	ind3	Indica
437	PTRV21	PRRI003243	4002	5-070-Red	Red	SALIMBOA	La Union	Ilocos Region	Ilocos Region	Region I	1e-05	0.99999	trop1	japonica
438	PTRV226	PRRI000262	2245	5-070-Red	Red	BINORNIG	La Union	Ilocos Region	Ilocos Region	Region I	0.99999	1e-05	ind3	Indica
439	PTRV227	PRRI000271	2254	5-070-Red	Red	BUMARO	La Union	Ilocos Region	Ilocos Region	Region I	0.99999	1e-05	ind3	Indica
440	PTRV231	PRRI000295	2278	5-070-Red	Red	KALLONG BUWAN	La Union	Ilocos Region	Ilocos Region	Region I	0.99999	1e-05	ind3	Indica
441	PTRV235	PRRI000301	2284	mix(red and white)	mix (red and white)	LIMANGCA	La Union	Ilocos Region	Ilocos Region	Region I	0.99999	1e-05	ind3	Indica
442	PTRV241	PRRI000356	2339	5-070-Red	Red	SAYGOROT	La Union	Ilocos Region	Ilocos Region	Region I	0.99999	1e-05	ind3	Indica
443	PTRV276	PRRI000520	2503	mix(red and variant purple)	mix (red and variant purple)	SA-IGOROT	La Union	Ilocos Region	Ilocos Region	Region I	1e-05	0.99999	trop1	japonica
444	PTRV514	-	13273	5-070-Red	Red	RED RICE B	La Union	Ilocos Region	Ilocos Region	Region I	0.514172	0.485828	admix	admix
445	PTRV515	-	13275	5-070-Red	Red	UPLAND RICE	La Union	Ilocos Region	Ilocos Region	Region I	0.99999	1e-05	indx	Indica
446	PTRV516	-	13277	5-070-Red	Red	JAPANESE PEARL	La Union	Ilocos Region	Ilocos Region	Region I	0.99999	1e-05	indx	Indica
447	PTRV8	PRRI003182	3940	5-070-Red	Red	KATLONG BULAN	La Union	Ilocos Region	Ilocos Region	Region I	0.99999	1e-05	ind3	Indica
448	PTRV82	PRRI005283	6276	5-070-Red	Red	ORTOK	La Union	Ilocos Region	Ilocos Region	Region I	0.99999	1e-05	ind3	Indica
449	PTRV215	PRRI000163	2146	5-070-Red	Red	ZARAGOSA	Pangasinan	Ilocos Region	Ilocos Region	Region I	0.99999	1e-05	ind3	Indica
450	PTRV258	PRRI000408	2391	5-070-Red	Red	BINUTUEN	Pangasinan	Ilocos Region	Ilocos Region	Region I	0.99999	1e-05	ind3	Indica
451	PTRV259	PRRI000411	351 / 2394	5-070-Red	Red	IMANG-IMANG	Pangasinan	Ilocos Region	Ilocos Region	Region I	0.99999	1e-05	ind3	Indica
452	PTRV269	PRRI000463	2446	5-070-Red	Red	STA. CATALINA	Pangasinan	Ilocos Region	Ilocos Region	Region I	0.99999	1e-05	ind3	Indica
453	PTRV279	PRRI000529	2512	5-070-Red	Red	IMMAYOCAN	Pangasinan	Ilocos Region	Ilocos Region	Region I	1e-05	0.99999	trop1	japonica
454	PTRV289	PRRI000554	2537	5-070-Red	Red	MALUIT	Pangasinan	Ilocos Region	Ilocos Region	Region I	1e-05	0.99999	trop1	japonica
455	PTRV125	PRRI006529	6221	5-070-Red	Red	MAGSABUD*	Palawan	Mimaropa	Mimaropa	Region IVB	1e-05	0.99999	trop1	japonica
456	PTRV148	PRRI003226	3985	5-070-Red	Red	MINANTIKA	Occidental Mindoro	Mimaropa	Mimaropa	Region IVB	1e-05	0.99999	trop1	japonica
457	PTRV150	PRRI003254	4013	5-070-Red	Red	SINANWAN	Occidental Mindoro	Mimaropa	Mimaropa	Region IVB	1e-05	0.99999	trop1	japonica
458	PTRV308	PRRI000670	1529	5-070-Red	Red	MITAO	Occidental Mindoro	Mimaropa	Mimaropa	Region IVB	0.99999	1e-05	indx	Indica
459	PTRV311	PRRI000741	1508	6-088-Variable purple	Variable purple	TININTA	Occidental Mindoro	Mimaropa	Mimaropa	Region IVB	1e-05	0.99999	trop1	japonica
460	PTRV320	PRRI000904	1475	5-070-Red	Red	CAMUROS	Occidental Mindoro	Mimaropa	Mimaropa	Region IVB	1e-05	0.99999	trop1	japonica
461	PTRV321	PRRI000914	1499	5-070-Red	Red	DAYOYO	Occidental Mindoro	Mimaropa	Mimaropa	Region IVB	1e-05	0.99999	trop1	japonica
462	PTRV322	PRRI000923	1522	5-070-Red	Red	BINIBE	Occidental Mindoro	Mimaropa	Mimaropa	Region IVB	1e-05	0.99999	trop1	japonica
463	PTRV40	PRRI003451	4275	5-070-Red	Red	BINTALAW	Occidental Mindoro	Mimaropa	Mimaropa	Region IVB	1e-05	0.99999	trop1	japonica
464	PTRV329	PRRI001769	97	5-070-Red	Red	BINIKOL	Oriental Mindoro	Mimaropa	Mimaropa	Region IVB	0.99999	1e-05	indx	Indica
465	PTRV9	PRRI003186	3944	5-070-Red	Red	KINANDANG PUTI	Oriental Mindoro	Mimaropa	Mimaropa	Region IVB	0.99999	1e-05	indx	Indica
466	14277	NA	NA	5-070-Red	Red	DENORADO	Palawan	Mimaropa	Mimaropa	Region IVB	1e-05	0.99999	trop1	japonica
467	14278	NA	NA	5-070-Red	Red	DURYAT	Palawan	Mimaropa	Mimaropa	Region IVB	0.015908	0.984092	trop1	japonica
468	15526	NA	NA	5-070-Red	Red	RODEL RODEL	Palawan	Mimaropa	Mimaropa	Region IVB	1e-05	0.99999	trop1	japonica
469	PTRV101	PRRI005792	10886	5-070-Red	Red	DORYAT	Palawan	Mimaropa	Mimaropa	Region IVB	0.013391	0.986609	trop1	japonica
470	PTRV105	PRRI005873	10920-A	7-080-Purple	Purple	LINANOS	Palawan	Mimaropa	Mimaropa	Region IVB	1e-05	0.99999	trop1	japonica
471	PTRV106	PRRI005885	10924	5-070-Red	Red	MANGATAS	Palawan	Mimaropa	Mimaropa	Region IVB	0.006522	0.993478	trop1	japonica
472	PTRV107	PRRI005888	10885	5-070-Red	Red	MILAGROSA (PULA)	Palawan	Mimaropa	Mimaropa	Region IVB	1e-05	0.99999	trop1	japonica
473	PTRV142	PRRI005931	10938-A	5-070-Red	Red	UNKNOWN	Palawan	Mimaropa	Mimaropa	Region IVB	1e-05	0.99999	trop1	japonica
474	PTRV145	PRRI003093	3833	7-080-Purple	Purple	TININTA	Palawan	Mimaropa	Mimaropa	Region IVB	1e-05	0.99999	trop1	japonica
475	PTRV185	PRRI006374	6131	5-070-Red	Red	KAPUKTOY*	Palawan	Mimaropa	Mimaropa	Region IVB	1e-05	0.99999	trop1	japonica
476	PTRV187	PRRI006416	5889	5-070-Red	Red	BANGGI*	Palawan	Mimaropa	Mimaropa	Region IVB	1e-05	0.99999	trop1	japonica
477	PTRV261	PRRI000422	2405	5-070-Red	Red	INANIBONG	Palawan	Mimaropa	Mimaropa	Region IVB	1e-05	0.99999	trop1	japonica
478	PTRV262	PRRI000423	2406	5-070-Red	Red	INIRAAN	Palawan	Mimaropa	Mimaropa	Region IVB	1e-05	0.99999	trop1	japonica
479	PTRV263	PRRI000425	2408	5-070-Red	Red	LUDAN	Palawan	Mimaropa	Mimaropa	Region IVB	0.021362	0.978638	trop1	japonica
480	PTRV282	PRRI000531	2514	5-070-Red	Red	KAPUKTOY	Palawan	Mimaropa	Mimaropa	Region IVB	1e-05	0.99999	trop1	japonica
481	PTRV342	PRRI001890	223-A	5-070-Red	Red	PINDINGA (B)	Palawan	Mimaropa	Mimaropa	Region IVB	0.973975	0.026025	ind2	Indica
482	PTRV362	PRRI003047	3783	5-070-Red	Red	MALAGKIT	Palawan	Mimaropa	Mimaropa	Region IVB	1e-05	0.99999	trop1	japonica
483	PTRV363	PRRI003065	3801	5-070-Red	Red	PINALUNGPUNG 1	Palawan	Mimaropa	Mimaropa	Region IVB	1e-05	0.99999	trop1	japonica
484	PTRV364	PRRI003068	3804	5-070-Red	Red	PINDINGA 1	Palawan	Mimaropa	Mimaropa	Region IVB	1e-05	0.99999	trop1	japonica
485	PTRV365	PRRI003078	3814	5-070-Red	Red	TIALE	Palawan	Mimaropa	Mimaropa	Region IVB	0.99999	1e-05	ind1B	Indica
486	PTRV366	PRRI003081	600 / 3817	mix(red and white)	mix (red and white)	TRES MARIAS	Palawan	Mimaropa	Mimaropa	Region IVB	0.99999	1e-05	indx	Indica
487	PTRV369	-	6073	5-070-Red	Red	INIRAAN*	Palawan	Mimaropa	Mimaropa	Region IVB	0.021979	0.978021	trop1	japonica
488	PTRV383	-	10941	mix(red and white)	mix (red and white)	INATAY	Palawan	Mimaropa	Mimaropa	Region IVB	1e-05	0.99999	trop1	japonica
489	PTRV54	PRRI003713	4539	5-070-Red	Red	LUBANG	Palawan	Mimaropa	Mimaropa	Region IVB	1e-05	0.99999	trop1	japonica
490	PTRV550	-	13592	5-070-Red	Red	MALIKET (A)	Palawan	Mimaropa	Mimaropa	Region IVB	1e-05	0.99999	trop1	japonica
491	PTRV570	-	10905	mix(red and white)	mix (red and white)	MATING	Palawan	Mimaropa	Mimaropa	Region IVB	1e-05	0.99999	trop1	japonica
492	PTRV59	PRRI003823	4652	5-070-Red	Red	MUNAN	Palawan	Mimaropa	Mimaropa	Region IVB	1e-05	0.99999	trop1	japonica
493	PTRV74	PRRI003941	4770	5-070-Red	Red	PINARUNGPONG (PULA)	Palawan	Mimaropa	Mimaropa	Region IVB	1e-05	0.99999	trop1	japonica
494	PTRV91	PRRI005715	10902	5-070-Red	Red	DINORADO	Palawan	Mimaropa	Mimaropa	Region IVB	0.013391	0.986609	trop1	japonica
495	PTRV92	PRRI005721	10934	5-070-Red	Red	DORIAT PULA	Palawan	Mimaropa	Mimaropa	Region IVB	0.013948	0.986052	trop1	japonica
496	PTRV93	PRRI005722	10888	5-070-Red	Red	DORYAT	Palawan	Mimaropa	Mimaropa	Region IVB	0.013391	0.986609	trop1	japonica
497	PTRV19	PRRI003239	3998	5-070-Red	Red	PINURSIGUE	Romblon	Mimaropa	Mimaropa	Region IVB	0.99999	1e-05	indx	Indica
498	PTRV239	PRRI000339	2322	5-070-Red	Red	RAGI-OS	Romblon	Mimaropa	Mimaropa	Region IVB	0.99999	1e-05	ind1B	Indica
499	PTRV157	PRRI003392	4175	5-070-Red	Red	LUBANG	Metropolitan Manila	National Capital Region	NCR	NCR	0.99999	1e-05	indx	Indica
500	PTRV197	PRRI000034	2017	5-070-Red	Red	SIPUR PUA (RED SIPOR)	Metropolitan Manila	National Capital Region	NCR	NCR	0.99999	1e-05	ind3	Indica
501	PTRV202	PRRI000098	2081	5-070-Red	Red	DUKAB	Metropolitan Manila	National Capital Region	NCR	NCR	0.99999	1e-05	ind3	Indica
502	PTRV203	PRRI000108	2091	5-070-Red	Red	KIMMABATITI	Metropolitan Manila	National Capital Region	NCR	NCR	0.99999	1e-05	ind3	Indica
503	PTRV204	PRRI000114	2097	5-070-Red	Red	MACABIAG	Metropolitan Manila	National Capital Region	NCR	NCR	0.99999	1e-05	ind3	Indica
504	PTRV205	PRRI000123	2106	5-070-Red	Red	MOTIT MOTIT	Metropolitan Manila	National Capital Region	NCR	NCR	0.99999	1e-05	ind3	Indica
505	PTRV206	PRRI000124	2107	5-070-Red	Red	PARPARIA	Metropolitan Manila	National Capital Region	NCR	NCR	0.99999	1e-05	ind3	Indica
506	PTRV207	PRRI000137	2120	5-070-Red	Red	TUKON-TUKOD	Metropolitan Manila	National Capital Region	NCR	NCR	0.99999	1e-05	ind3	Indica
507	PTRV210	PRRI000146	2129	5-070-Red	Red	BINANGAHON	Metropolitan Manila	National Capital Region	NCR	NCR	0.99999	1e-05	ind3	Indica
508	PTRV211	PRRI000153	2136	6-088-Variable purple	Variable purple	MARAGADAN	Metropolitan Manila	National Capital Region	NCR	NCR	0.927532	0.072468	ind3	Indica
509	PTRV213	PRRI000156	2139	5-070-Red	Red	KIANGAN RICE (BLACK)	Metropolitan Manila	National Capital Region	NCR	NCR	0.99999	1e-05	ind3	Indica
510	PTRV214	PRRI000157	2140	5-070-Red	Red	KINTUMAN (DALOG)	Metropolitan Manila	National Capital Region	NCR	NCR	0.99999	1e-05	ind3	Indica
511	PTRV234	PRRI000299	2282	5-070-Red	Red	KURAGRAG	Metropolitan Manila	National Capital Region	NCR	NCR	0.99999	1e-05	ind3	Indica
512	PTRV252	PRRI000389	2372	6-088-Variable purple	Variable purple	PALAGADAN	Metropolitan Manila	National Capital Region	NCR	NCR	0.969769	0.030231	ind3	Indica
513	PTRV273	PRRI000504	2487	5-070-Red	Red	KALINDOL (BULUHAN)	Metropolitan Manila	National Capital Region	NCR	NCR	0.99999	1e-05	indx	Indica
514	PTRV35	PRRI003356	4131	5-070-Red	Red	MACARATO	Metropolitan Manila	National Capital Region	NCR	NCR	1e-05	0.99999	trop1	japonica
515	PTRV36	PRRI003391	4174	5-070-Red	Red	TAPLIAC	Metropolitan Manila	National Capital Region	NCR	NCR	0.99999	1e-05	ind3	Indica
516	PTRV543	-	13497	5-070-Red	Red	PARINA	Metropolitan Manila	National Capital Region	NCR	NCR	1e-05	0.99999	trop1	japonica
517	PTRV577	PRRI000034	2017	5-070-Red	Red	SIPUR PUA (RED SIPOR)	Metropolitan Manila	National Capital Region	NCR	NCR	0.99999	1e-05	ind3	Indica
518	PTRV582	PRRI000098	2081	5-070-Red	Red	DUKAB	Metropolitan Manila	National Capital Region	NCR	NCR	0.99999	1e-05	ind3	Indica
519	PTRV583	PRRI000108	2091	5-070-Red	Red	KIMMABATITI	Metropolitan Manila	National Capital Region	NCR	NCR	0.99999	1e-05	ind3	Indica
520	PTRV584	PRRI000114	2097	5-070-Red	Red	MACABIAG	Metropolitan Manila	National Capital Region	NCR	NCR	0.99999	1e-05	ind3	Indica
521	PTRV585	PRRI000123	2106	5-070-Red	Red	MOTIT MOTIT	Metropolitan Manila	National Capital Region	NCR	NCR	0.99999	1e-05	ind3	Indica
522	PTRV586	PRRI000124	2107	5-070-Red	Red	PARPARIA	Metropolitan Manila	National Capital Region	NCR	NCR	0.99999	1e-05	ind3	Indica
523	PTRV587	PRRI000137	2120	5-070-Red	Red	TUKON-TUKOD	Metropolitan Manila	National Capital Region	NCR	NCR	0.99999	1e-05	ind3	Indica
524	PTRV590	PRRI000146	2129	5-070-Red	Red	BINANGAHON	Metropolitan Manila	National Capital Region	NCR	NCR	0.99999	1e-05	ind3	Indica
525	PTRV591	PRRI000153	2136	6-088-Variable purple	Variable purple	MARAGADAN	Metropolitan Manila	National Capital Region	NCR	NCR	0.955685	0.044315	ind3	Indica
526	PTRV593	PRRI000156	2139	5-070-Red	Red	KIANGAN RICE (BLACK)	Metropolitan Manila	National Capital Region	NCR	NCR	0.99999	1e-05	ind3	Indica
527	PTRV594	PRRI000157	2140	5-070-Red	Red	KINTUMAN (DALOG)	Metropolitan Manila	National Capital Region	NCR	NCR	0.99999	1e-05	ind3	Indica
528	12780-A	NA	NA	5-070-Red	Red	DUMUDAO	Bukidnon	Northern Mindanao	Northern Mindanao	Region X	1e-05	0.99999	trop1	japonica
529	PTRV251	PRRI000388	848 / 2371	5-070-Red	Red	MENORADO	Bukidnon	Northern Mindanao	Northern Mindanao	Region X	1e-05	0.99999	trop1	japonica
530	PTRV386	-	11376	5-070-Red	Red	KALOSISI	Bukidnon	Northern Mindanao	Northern Mindanao	Region X	1e-05	0.99999	trop1	japonica
531	PTRV553	-	13595	5-070-Red	Red	DINORADO	Bukidnon	Northern Mindanao	Northern Mindanao	Region X	1e-05	0.99999	trop1	japonica
532	12795	NA	NA	5-070-Red	Red	MARIA GAKIT	Misamis Oriental	Northern Mindanao	Northern Mindanao	Region X	1e-05	0.99999	trop1	japonica
533	12796	NA	NA	5-070-Red	Red	SPEAKER	Misamis Oriental	Northern Mindanao	Northern Mindanao	Region X	1e-05	0.99999	trop1	japonica
534	PTRV176	PRRI006116	11052	5-070-Red	Red	KABUYOG	Misamis Oriental	Northern Mindanao	Northern Mindanao	Region X	1e-05	0.99999	trop1	japonica
535	PTRV178	PRRI006162	11046	5-070-Red	Red	MAL-OS	Misamis Oriental	Northern Mindanao	Northern Mindanao	Region X	1e-05	0.99999	trop1	japonica
536	12836	NA	NA	5-070-Red	Red	BLACK RICE	North Cotabato	Soccsksargen	Soccsksargen	Region XII	0.99999	1e-05	indx	Indica
537	14760	NA	NA	5-070-Red	Red	DINORADO	North Cotabato	Soccsksargen	Soccsksargen	Region XII	1e-05	0.99999	trop1	japonica
538	15608	NA	NA	5-070-Red	Red	MERFUL	North Cotabato	Soccsksargen	Soccsksargen	Region XII	0.99999	1e-05	indx	Indica
539	15618	NA	NA	5-070-Red	Red	KIRABAN	North Cotabato	Soccsksargen	Soccsksargen	Region XII	1e-05	0.99999	trop1	japonica
540	15620	NA	NA	5-070-Red	Red	TANGGILING	North Cotabato	Soccsksargen	Soccsksargen	Region XII	0.99999	1e-05	indx	Indica
541	12798-A	NA	NA	5-070-Red	Red	DINORADO	North Cotabato	Soccsksargen	Soccsksargen	Region XII	1e-05	0.99999	trop1	japonica
542	12798-B	NA	NA	5-070-Red	Red	DINORADO	North Cotabato	Soccsksargen	Soccsksargen	Region XII	1e-05	0.99999	trop1	japonica
543	12800-A	NA	NA	5-070-Red	Red	AWOT	North Cotabato	Soccsksargen	Soccsksargen	Region XII	0.99999	1e-05	indx	Indica
544	12801-A	NA	NA	5-070-Red	Red	DINORADO	North Cotabato	Soccsksargen	Soccsksargen	Region XII	1e-05	0.99999	trop1	japonica
545	12801-B	NA	NA	5-070-Red	Red	DINORADO	North Cotabato	Soccsksargen	Soccsksargen	Region XII	1e-05	0.99999	trop1	japonica
546	12802-A	NA	NA	5-070-Red	Red	AWOT	North Cotabato	Soccsksargen	Soccsksargen	Region XII	0.99999	1e-05	indx	Indica
547	12835-A	NA	NA	5-070-Red	Red	RED RICE	North Cotabato	Soccsksargen	Soccsksargen	Region XII	1e-05	0.99999	trop1	japonica
548	PTRV123	PRRI006564	6361	5-070-Red	Red	PALAWENYO	North Cotabato	Soccsksargen	Soccsksargen	Region XII	1e-05	0.99999	trop1	japonica
549	PTRV189	PRRI006444	5974	5-070-Red	Red	DINORADO	North Cotabato	Soccsksargen	Soccsksargen	Region XII	1e-05	0.99999	trop1	japonica
550	PTRV305	PRRI000642	1465	5-070-Red	Red	INUMAY	North Cotabato	Soccsksargen	Soccsksargen	Region XII	0.99999	1e-05	ind1B	Indica
551	PTRV306	PRRI000643	1466	5-070-Red	Red	LUBANG WHITE	North Cotabato	Soccsksargen	Soccsksargen	Region XII	0.99999	1e-05	indx	Indica
552	PTRV307	PRRI000644	1467	5-070-Red	Red	HANDURAYAN	North Cotabato	Soccsksargen	Soccsksargen	Region XII	0.99999	1e-05	ind3	Indica
553	PTRV313	PRRI000816	1137-A	5-070-Red	Red	KABUAK	North Cotabato	Soccsksargen	Soccsksargen	Region XII	0.062056	0.937944	trop1	japonica
554	PTRV314	PRRI000815	1132	5-070-Red	Red	RED TONNER	North Cotabato	Soccsksargen	Soccsksargen	Region XII	0.99999	1e-05	indx	Indica
555	PTRV315	PRRI000864	1137-B	5-070-Red	Red	KABUAK	North Cotabato	Soccsksargen	Soccsksargen	Region XII	0.062056	0.937944	trop1	japonica
556	PTRV319	PRRI000903	1471	5-070-Red	Red	UNKNOWN	North Cotabato	Soccsksargen	Soccsksargen	Region XII	0.985032	0.014968	indx	Indica
557	PTRV354	PRRI002730	1133	5-070-Red	Red	KUA KUA	North Cotabato	Soccsksargen	Soccsksargen	Region XII	1e-05	0.99999	trop1	japonica
558	PTRV409	-	11926	5-070-Red	Red	DINORADO	North Cotabato	Soccsksargen	Soccsksargen	Region XII	1e-05	0.99999	trop1	japonica
559	PTRV410	-	11927	5-070-Red	Red	DINORADO	North Cotabato	Soccsksargen	Soccsksargen	Region XII	1e-05	0.99999	trop1	japonica
560	PTRV502	-	12801	5-070-Red	Red	DINORADO	North Cotabato	Soccsksargen	Soccsksargen	Region XII	1e-05	0.99999	trop1	japonica
561	12699	NA	NA	5-070-Red	Red	BLACK RICE	South Cotabato	Soccsksargen	Soccsksargen	Region XII	0.99999	1e-05	indx	Indica
562	12700	NA	NA	5-070-Red	Red	KASAGPI	South Cotabato	Soccsksargen	Soccsksargen	Region XII	1e-05	0.99999	trop1	japonica
563	PTRV328	PRRI001757	208	5-070-Red	Red	AWOT	South Cotabato	Soccsksargen	Soccsksargen	Region XII	1e-05	0.99999	trop1	japonica
564	PTRV334	PRRI001793	211	5-070-Red	Red	DINORADO (A)	South Cotabato	Soccsksargen	Soccsksargen	Region XII	0.99999	1e-05	ind1B	Indica
565	PTRV337	PRRI001860	113	5-070-Red	Red	DINORADO	South Cotabato	Soccsksargen	Soccsksargen	Region XII	1e-05	0.99999	trop1	japonica
566	PTRV475	-	12699	7-080-Purple	Purple	BLACK RICE	South Cotabato	Soccsksargen	Soccsksargen	Region XII	0.99999	1e-05	indx	Indica
567	PTRV476	-	12700	5-070-Red	Red	KASAGPI	South Cotabato	Soccsksargen	Soccsksargen	Region XII	1e-05	0.99999	trop1	japonica
568	14759	NA	NA	5-070-Red	Red	AZUCENA	Sultan Kudarat	Soccsksargen	Soccsksargen	Region XII	1e-05	0.99999	trop1	japonica
569	12811-A	NA	NA	5-070-Red	Red	KASAGPI	Sultan Kudarat	Soccsksargen	Soccsksargen	Region XII	0.558936	0.441064	admix	admix
570	PTRV503	-	12811	5-070-Red	Red	KASAGPI	Sultan Kudarat	Soccsksargen	Soccsksargen	Region XII	1e-05	0.99999	trop1	japonica
571	15231	NA	NA	5-070-Red	Red	GABAY (ALO-AL)	Unknown	Unknown	Unknown	Unknown	1e-05	0.99999	trop1	japonica
572	15404	NA	NA	5-070-Red	Red	SPEAKER	Unknown	Unknown	Unknown	Unknown	1e-05	0.99999	trop1	japonica
573	15405	NA	NA	5-070-Red	Red	BATIOKAN	Unknown	Unknown	Unknown	Unknown	1e-05	0.99999	trop1	japonica
574	15406	NA	NA	5-070-Red	Red	INAMPER	Unknown	Unknown	Unknown	Unknown	1e-05	0.99999	trop1	japonica
575	15408	NA	NA	5-070-Red	Red	BALATINAW	Unknown	Unknown	Unknown	Unknown	0.265342	0.734658	trop1	admix
576	15413	NA	NA	5-070-Red	Red	TIPONO	Unknown	Unknown	Unknown	Unknown	1e-05	0.99999	trop1	japonica
577	15423	NA	NA	5-070-Red	Red	BLACK RICE	Unknown	Unknown	Unknown	Unknown	0.99999	1e-05	indx	Indica
578	12082-C	NA	NA	NA	NA	NA	Unknown	Unknown	Unknown	Unknown	0.965648	0.034352	indx	Indica
579	12837-C	NA	NA	NA	NA	NA	Unknown	Unknown	Unknown	Unknown	0.963365	0.036635	indx	Indica
580	13914-B	NA	NA	NA	NA	x	Unknown	Unknown	Unknown	Unknown	1e-05	0.99999	trop1	japonica
581	PTRV100	PRRI005791	7784	5-070-Red	Red	DINORADO COLORED 2 SELECTION	Unknown	Unknown	Unknown	Unknown	1e-05	0.99999	trop1	japonica
582	PTRV104	PRRI005869	7805	5-070-Red	Red	KOMEKENTING	Unknown	Unknown	Unknown	Unknown	0.99999	1e-05	ind3	Indica
583	PTRV127	PRRI006465	11437	5-070-Red	Red	GANJA CHOOTA	Unknown	Unknown	Unknown	Unknown	0.99999	1e-05	indx	Indica
584	PTRV129	PRRI006455	11422	5-070-Red	Red	DULAR	Unknown	Unknown	Unknown	Unknown	0.803351	0.196649	aus	Indica
585	PTRV130	PRRI006436	5961	5-070-Red	Red	DIGHA	Unknown	Unknown	Unknown	Unknown	0.817585	0.182415	aus	Indica
586	PTRV131	PRRI006369	6060	5-070-Red	Red	HIDA	Unknown	Unknown	Unknown	Unknown	0.959829	0.040171	ind2	Indica
587	PTRV138	PRRI006256	10713	5-070-Red	Red	SURJA MUKHA	Unknown	Unknown	Unknown	Unknown	0.786399	0.213601	aus	Indica
588	PTRV143	PRRI005919	7810	5-070-Red	Red	RED TONER	Unknown	Unknown	Unknown	Unknown	0.99999	1e-05	ind1B	Indica
589	PTRV18	PRRI003230	3989	5-070-Red	Red	NAGPUNIT	Unknown	Unknown	Unknown	Unknown	0.99999	1e-05	indx	Indica
590	PTRV188	PRRI006424	5911	5-070-Red	Red	BRILLIANTE	Unknown	Unknown	Unknown	Unknown	0.99999	1e-05	ind3	Indica
591	PTRV195	PRRI000006	1989	5-070-Red	Red	NAGPILI	Unknown	Unknown	Unknown	Unknown	0.99999	1e-05	ind3	Indica
592	PTRV218	PRRI000179	464 / 2162	5-070-Red	Red	TUHAW	Unknown	Unknown	Unknown	Unknown	0.99999	1e-05	ind3	Indica
593	PTRV323	PRRI000976	1735	5-070-Red	Red	DINORADO (WHITE)	Unknown	Unknown	Unknown	Unknown	0.99999	1e-05	indx	Indica
594	PTRV356	PRRI002933	3660	5-070-Red	Red	FORTUNA	Unknown	Unknown	Unknown	Unknown	0.99999	1e-05	indx	Indica
595	PTRV357	PRRI002671	1000	5-070-Red	Red	LUBANG MATALOM	Unknown	Unknown	Unknown	Unknown	0.99999	1e-05	indx	Indica
596	PTRV358	PRRI002938	3665	5-070-Red	Red	MAKAPILAY PUSA	Unknown	Unknown	Unknown	Unknown	0.999078	0.000922	indx	Indica
597	PTRV359	PRRI002952	3679	5-070-Red	Red	KINAWAYAN	Unknown	Unknown	Unknown	Unknown	0.99999	1e-05	ind3	Indica
598	PTRV360	PRRI002956	3683	5-070-Red	Red	PURSIGUI	Unknown	Unknown	Unknown	Unknown	0.99999	1e-05	indx	Indica
599	PTRV361	PRRI002970	3699	5-070-Red	Red	BINALASANG	Unknown	Unknown	Unknown	Unknown	0.99999	1e-05	ind3	Indica
600	PTRV373	-	7781	5-070-Red	Red	KUTSIYAM	Unknown	Unknown	Unknown	Unknown	1e-05	0.99999	trop1	japonica
601	PTRV396	-	7805	5-070-Red	Red	KOMEKENTING	Unknown	Unknown	Unknown	Unknown	0.99999	1e-05	ind3	Indica
602	PTRV454	-	12421	6-088-Variable purple	Variable purple	PERURUTONG MAGDALENA	Unknown	Unknown	Unknown	Unknown	1e-05	0.99999	trop1	japonica
603	PTRV455	-	12439	5-050-Brown	Brown	BINATO	Unknown	Unknown	Unknown	Unknown	1e-05	0.99999	trop1	japonica
604	PTRV456	-	12501	6-088-Variable purple	Variable purple	TAPUL	Unknown	Unknown	Unknown	Unknown	0.99999	1e-05	indx	Indica
605	PTRV457	-	12600	6-088-Variable purple	Variable purple	RED RICE	Unknown	Unknown	Unknown	Unknown	1e-05	0.99999	trop1	japonica
606	PTRV458	-	12602	5-070-Red	Red	BALIBOD	Unknown	Unknown	Unknown	Unknown	0.987009	0.012991	indx	Indica
607	PTRV459	-	12605	6-088-Variable purple	Variable purple	INIPOT-IBON	Unknown	Unknown	Unknown	Unknown	1e-05	0.99999	trop1	japonica
608	PTRV460	-	12620	5-070-Red	Red	RED RICE	Unknown	Unknown	Unknown	Unknown	0.99999	1e-05	ind1B	Indica
609	PTRV464	-	12650	5-070-Red	Red	RED 64	Unknown	Unknown	Unknown	Unknown	0.99999	1e-05	ind1B	Indica
610	PTRV480	-	12717	5-070-Red	Red	BATIOKAN	Unknown	Unknown	Unknown	Unknown	1e-05	0.99999	trop1	japonica
611	PTRV481	-	12718	5-070-Red	Red	DENURADO	Unknown	Unknown	Unknown	Unknown	1e-05	0.99999	trop1	japonica
612	PTRV482	-	12718	5-070-Red	Red	DENURADO	Unknown	Unknown	Unknown	Unknown	1e-05	0.99999	trop1	japonica
613	PTRV483	-	12719	5-070-Red	Red	GABAY	Unknown	Unknown	Unknown	Unknown	1e-05	0.99999	trop1	japonica
614	PTRV484	-	12721	5-070-Red	Red	MAKALPO	Unknown	Unknown	Unknown	Unknown	1e-05	0.99999	trop1	japonica
615	PTRV485	-	12724	5-070-Red	Red	SAGABAY	Unknown	Unknown	Unknown	Unknown	1e-05	0.99999	trop1	japonica
616	PTRV486	-	12730	5-070-Red	Red	TANGGUILING	Unknown	Unknown	Unknown	Unknown	0.99999	1e-05	indx	Indica
617	PTRV5	PRRI003131	3886	5-070-Red	Red	BINASTIAN	Unknown	Unknown	Unknown	Unknown	0.65756	0.34244	admix	admix
618	PTRV513	-	12987	5-070-Red	Red	HINUMAY	Unknown	Unknown	Unknown	Unknown	0.997647	0.002353	indx	Indica
619	PTRV517	-	13286	5-070-Red	Red	MALIDO RED (SAME AS ACC 5009)	Unknown	Unknown	Unknown	Unknown	1e-05	0.99999	trop1	japonica
620	PTRV538	-	13426	5-070-Red	Red	DENORADO RED	Unknown	Unknown	Unknown	Unknown	1e-05	0.99999	trop1	japonica
621	PTRV539	-	13488	5-070-Red	Red	BURGIS	Unknown	Unknown	Unknown	Unknown	1e-05	0.99999	trop1	japonica
622	PTRV540	-	13489	5-070-Red	Red	MALIKET (A)	Unknown	Unknown	Unknown	Unknown	1e-05	0.99999	trop1	japonica
623	PTRV541	-	13490	5-070-Red	Red	BULILISING (A)	Unknown	Unknown	Unknown	Unknown	1e-05	0.99999	trop1	japonica
624	PTRV542	-	13493	5-070-Red	Red	PALAWAN (A)	Unknown	Unknown	Unknown	Unknown	1e-05	0.99999	trop1	japonica
625	PTRV549	-	13591	5-070-Red	Red	BUGA	Unknown	Unknown	Unknown	Unknown	1e-05	0.99999	trop1	japonica
626	PTRV551	-	13593	5-070-Red	Red	MINAMA	Unknown	Unknown	Unknown	Unknown	1e-05	0.99999	trop1	japonica
627	PTRV552	-	13594	5-070-Red	Red	BULILISING (A)	Unknown	Unknown	Unknown	Unknown	1e-05	0.99999	trop1	japonica
628	PTRV554	-	13599	5-070-Red	Red	KILONG	Unknown	Unknown	Unknown	Unknown	1e-05	0.99999	trop1	japonica
629	PTRV555	-	13601	5-070-Red	Red	BALSAMO (A)	Unknown	Unknown	Unknown	Unknown	1e-05	0.99999	trop1	japonica
630	PTRV556	-	13602	5-070-Red	Red	BALSAMO (B)	Unknown	Unknown	Unknown	Unknown	1e-05	0.99999	trop1	japonica
631	PTRV557	-	13603	5-070-Red	Red	PALAWAN (A)	Unknown	Unknown	Unknown	Unknown	1e-05	0.99999	trop1	japonica
632	PTRV558	-	13604	5-070-Red	Red	MALAGKIT	Unknown	Unknown	Unknown	Unknown	1e-05	0.99999	trop1	japonica
633	PTRV559	-	13605	5-070-Red	Red	PANGPADAN	Unknown	Unknown	Unknown	Unknown	0.99999	1e-05	ind3	Indica
634	PTRV560	-	13608	5-070-Red	Red	LUKDIT NI ABALAYAN	Unknown	Unknown	Unknown	Unknown	1e-05	0.99999	trop1	japonica
635	PTRV561	-	13611	5-070-Red	Red	BADDANG	Unknown	Unknown	Unknown	Unknown	1e-05	0.99999	trop1	japonica
636	PTRV562	-	13612	5-070-Red	Red	SABA	Unknown	Unknown	Unknown	Unknown	1e-05	0.99999	trop1	japonica
637	PTRV563	-	13613	5-070-Red	Red	SABADILLA	Unknown	Unknown	Unknown	Unknown	1e-05	0.99999	trop1	japonica
638	PTRV564	-	13620	6-088-Variable purple	Variable purple	ILONGGOT	Unknown	Unknown	Unknown	Unknown	1e-05	0.99999	trop1	japonica
639	PTRV565	-	13622	5-070-Red	Red	ISIC PUGOT	Unknown	Unknown	Unknown	Unknown	1e-05	0.99999	trop1	japonica
640	PTRV566	-	13623	5-070-Red	Red	GANNAL (BATAC)	Unknown	Unknown	Unknown	Unknown	1e-05	0.99999	trop1	japonica
641	PTRV567	-	13624	5-070-Red	Red	BALLATINAW - DATI	Unknown	Unknown	Unknown	Unknown	1e-05	0.99999	trop1	japonica
642	PTRV575	PRRI000006	1989	5-070-Red	Red	NAGPILI	Unknown	Unknown	Unknown	Unknown	0.99999	1e-05	ind3	Indica
643	PTRV77	PRRI005155	7373	5-070-Red	Red	SIPULUT HAROTAS	Unknown	Unknown	Unknown	Unknown	0.99999	1e-05	ind3	Indica
644	PTRV78	PRRI005158	7379	5-070-Red	Red	SITALI	Unknown	Unknown	Unknown	Unknown	0.999377	0.000623	ind3	Indica
645	PTRV79	PRRI005220	7192	5-070-Red	Red	ROYOT B	Unknown	Unknown	Unknown	Unknown	0.980751	0.019249	ind3	Indica
646	PTRV80	PRRI005233	7363	5-070-Red	Red	SIHOPA	Unknown	Unknown	Unknown	Unknown	0.989529	0.010471	ind3	Indica
647	PTRV81	PRRI005241	7372	5-070-Red	Red	SIMERAH	Unknown	Unknown	Unknown	Unknown	0.99999	1e-05	ind3	Indica
648	PTRV83	PRRI005307	6333	5-070-Red	Red	PADI BANTEN	Unknown	Unknown	Unknown	Unknown	0.154319	0.845681	trop1	japonica
649	PTRV84	PRRI005310	6337	7-080-Purple	Purple	PADI HEDENG (REKET HEDENG)	Unknown	Unknown	Unknown	Unknown	0.260629	0.739371	trop1	admix
650	PTRV85	PRRI005380	7547	1-010-White	White	PADI ANUSAN	Unknown	Unknown	Unknown	Unknown	0.99999	1e-05	ind3	Indica
651	PTRV86	PRRI005451	7351	5-070-Red	Red	SHASTAK	Unknown	Unknown	Unknown	Unknown	0.83699	0.16301	aus	Indica
652	PTRV87	PRRI005471	7371	5-070-Red	Red	SIMEDAN	Unknown	Unknown	Unknown	Unknown	0.995471	0.004529	ind3	Indica
653	PTRV94	PRRI005753	6381	mix(white and variable)	mix (white and variable)	PINILING BAYBAY	Unknown	Unknown	Unknown	Unknown	1e-05	0.99999	trop1	japonica
654	PTRV95	PRRI005760	7662	5-070-Red	Red	BALLATINAO	Unknown	Unknown	Unknown	Unknown	1e-05	0.99999	trop1	japonica
655	PTRV98	PRRI005778	7760	5-070-Red	Red	KOMONING	Unknown	Unknown	Unknown	Unknown	0.027238	0.972762	trop1	japonica
656	PTRV99	PRRI005779	7765	5-070-Red	Red	DINORADO COLORED 2	Unknown	Unknown	Unknown	Unknown	1e-05	0.99999	trop1	japonica
657	PTRVa	NA	NA	NA	NA	NA	Unknown	Unknown	Unknown	Unknown	0.134243	0.865757	trop1	japonica
658	PTRVb	NA	NA	NA	NA	NA	Unknown	Unknown	Unknown	Unknown	0.134181	0.865819	trop1	japonica
659	PTRVc	NA	NA	NA	NA	NA	Unknown	Unknown	Unknown	Unknown	0.99999	1e-05	ind3	Indica
660	PTRVd	NA	NA	NA	NA	NA	Unknown	Unknown	Unknown	Unknown	0.99999	1e-05	ind3	Indica
661	PTRVe	NA	NA	NA	NA	NA	Unknown	Unknown	Unknown	Unknown	0.99999	1e-05	indx	Indica
662	PTRVf	NA	NA	NA	NA	NA	Unknown	Unknown	Unknown	Unknown	0.99999	1e-05	indx	Indica
663	PTRVg	NA	NA	NA	NA	NA	Unknown	Unknown	Unknown	Unknown	0.99999	1e-05	ind3	Indica
664	PTRVh	NA	NA	NA	NA	NA	Unknown	Unknown	Unknown	Unknown	1e-05	0.99999	trop1	japonica
665	PTRVi	NA	NA	NA	NA	NA	Unknown	Unknown	Unknown	Unknown	0.99999	1e-05	ind3	Indica
666	PTRVj	NA	NA	NA	NA	NA	Unknown	Unknown	Unknown	Unknown	0.99999	1e-05	ind1B	Indica
667	PTRV32	PRRI003325	4096	5-070-Red	Red	KAMOROS	Aklan	Western Visayas	Western Visayas	Region VI	0.99999	1e-05	indx	Indica
668	PTRV124	PRRI006539	271	5-070-Red	Red	MURADO	Antique	Western Visayas	Western Visayas	Region VI	0.999815	0.000185	indx	Indica
669	PTRV3	PRRI003116	3859	5-070-Red	Red	CAMORRUS	Antique	Western Visayas	Western Visayas	Region VI	0.99999	1e-05	ind3	Indica
670	PTRV309	PRRI000671	1539	5-070-Red	Red	SALIMPOPOY	Antique	Western Visayas	Western Visayas	Region VI	0.99999	1e-05	indx	Indica
671	PTRV310	PRRI000672	1546	5-070-Red	Red	DINORADO	Antique	Western Visayas	Western Visayas	Region VI	0.99999	1e-05	indx	Indica
672	PTRV463	-	12642	5-070-Red	Red	SIETENTA	Antique	Western Visayas	Western Visayas	Region VI	0.99999	1e-05	indx	Indica
673	15530	NA	NA	5-070-Red	Red	SULIG	Guimaras	Western Visayas	Western Visayas	Region VI	0.99999	1e-05	indx	Indica
674	PTRV27	PRRI003280	4049	5-070-Red	Red	CUTSIAM	Guimaras	Western Visayas	Western Visayas	Region VI	0.99999	1e-05	indx	Indica
675	12849-A	NA	NA	5-070-Red	Red	MALIDO RED	Iloilo	Western Visayas	Western Visayas	Region VI	1e-05	0.99999	trop1	japonica
676	12849-B	NA	NA	5-070-Red	Red	MALIDO RED	Iloilo	Western Visayas	Western Visayas	Region VI	1e-05	0.99999	trop1	japonica
677	PTRV2	PRRI003110	3853	5-070-Red	Red	SAMPOPOY	Iloilo	Western Visayas	Western Visayas	Region VI	0.99999	1e-05	indx	Indica
678	PTRV139	PRRI006200	11360	6-088-Variable purple	Variable purple	MUSLIM	Negros Occidental	Western Visayas	Western Visayas	Region VI	0.091846	0.908154	trop1	japonica
679	PTRV177	PRRI006135	11115	5-070-Red	Red	KATIPAK	Negros Occidental	Western Visayas	Western Visayas	Region VI	1e-05	0.99999	trop1	japonica
680	PTRV28	PRRI003281	4050	5-070-Red	Red	CUTYAM	Negros Occidental	Western Visayas	Western Visayas	Region VI	0.99999	1e-05	indx	Indica
681	PTRV462	-	12640	6-088-Variable purple	Variable purple	MALAGAYA	Negros Occidental	Western Visayas	Western Visayas	Region VI	1e-05	0.99999	trop1	japonica
682	14072	NA	NA	5-070-Red	Red	DINORADO	Zamboanga del Norte	Zamboanga Peninsula	Zamboanga Peninsula	Region IX	0.065782	0.934218	trop1	japonica
683	14077	NA	NA	5-070-Red	Red	ISMAGOL	Zamboanga del Norte	Zamboanga Peninsula	Zamboanga Peninsula	Region IX	1e-05	0.99999	trop1	japonica
684	PTRV11	PRRI003199	3957	5-070-Red	Red	LOBANG (RED)	Zamboanga del Norte	Zamboanga Peninsula	Zamboanga Peninsula	Region IX	0.967656	0.032344	indx	Indica
685	PTRV156	PRRI003351	4126	5-070-Red	Red	LUBANG	Zamboanga del Norte	Zamboanga Peninsula	Zamboanga Peninsula	Region IX	0.99999	1e-05	indx	Indica
686	PTRV249	PRRI000386	2369	5-070-Red	Red	COTSIYAM	Zamboanga del Norte	Zamboanga Peninsula	Zamboanga Peninsula	Region IX	1e-05	0.99999	trop1	japonica
687	14079	NA	NA	5-070-Red	Red	ISMAGOL _PULA	Zamboanga del Sur	Zamboanga Peninsula	Zamboanga Peninsula	Region IX	1e-05	0.99999	trop1	japonica
688	14082	NA	NA	5-070-Red	Red	ISMAGOL _PUTI	Zamboanga del Sur	Zamboanga Peninsula	Zamboanga Peninsula	Region IX	1e-05	0.99999	trop1	japonica
689	15242	NA	NA	5-070-Red	Red	KALINGKIT _BLACK	Zamboanga del Sur	Zamboanga Peninsula	Zamboanga Peninsula	Region IX	1e-05	0.99999	trop1	japonica
690	PTRV1	PRRI003109	3852	5-070-Red	Red	REMELITES	Zamboanga del Sur	Zamboanga Peninsula	Zamboanga Peninsula	Region IX	1e-05	0.99999	trop1	japonica
691	PTRV155	PRRI003339	4112	5-070-Red	Red	CARABAO	Zamboanga del Sur	Zamboanga Peninsula	Zamboanga Peninsula	Region IX	0.99999	1e-05	ind1B	Indica
692	PTRV23	PRRI003257	4016	5-070-Red	Red	TAYAK	Zamboanga del Sur	Zamboanga Peninsula	Zamboanga Peninsula	Region IX	0.99999	1e-05	indx	Indica
693	PTRV438	-	12254	6-088-Variable purple	Variable purple	MAREM	Zamboanga del Sur	Zamboanga Peninsula	Zamboanga Peninsula	Region IX	1e-05	0.99999	trop1	japonica
694	PTRV439	-	12258	7-080-Purple	Purple	PEHETAN PURE	Zamboanga del Sur	Zamboanga Peninsula	Zamboanga Peninsula	Region IX	1e-05	0.99999	trop1	japonica
695	15488	NA	NA	5-070-Red	Red	TAYAK PULA	Zamboanga Sibugay	Zamboanga Peninsula	Zamboanga Peninsula	Region IX	1e-05	0.99999	trop1	japonica
696	15647	NA	NA	5-070-Red	Red	PEKITAN	Zamboanga Sibugay	Zamboanga Peninsula	Zamboanga Peninsula	Region IX	1e-05	0.99999	trop1	japonica

## Sheet: Table S8
Accessions from neigboring countries used in this study
Name	IRIS ID	Accessions	Countries	Caryopsiscolordescriptors	Caryopsis color
ADUKKAN::IRGC 81783-1	IRIS 313-12052	IRGC 127109	India	5-070-Red	Red
AI JIAO ZI::IRGC 82255-1	IRIS 313-12057	IRGC 127116	China	5-070-Red	Red
AI ZI HUNG::IRGC 51255-1	IRIS 313-9723	IRGC 126129	China	5-070-Red	Red
ARC 10581::IRGC 12514-1	IRIS 313-10671	IRGC 127128	India	5-070-Red	Red
ARC 10594::IRGC 12524-1	IRIS 313-9609	IRGC 125636	India	5-070-Red	Red
ARC 10799::IRGC 12631-1	IRIS 313-9313	IRGC 125638	India	5-070-Red	Red
ARC 10846::IRGC 12656-2	IRIS 313-10674	IRGC 127932	India	5-070-Red	Red
ARC 10905::IRGC 12669-1	IRIS 313-10675	IRGC 127132	India	5-070-Red	Red
ARC 10939::IRGC 21150-2	IRIS 313-10859	IRGC 127933	India	5-070-Red	Red
ARC 11322::IRGC 21315-2	IRIS 313-10863	IRGC 127937	India	5-070-Red	Red
ARC 11538::IRGC 21463-1	IRIS 313-10867	IRGC 128222	India	5-070-Red	Red
ARC 11946::IRGC 21768-2	IRIS 313-10874	IRGC 132318	India	5-070-Red	Red
ARC 12730::IRGC 22291-1	IRIS 313-10889		India	5-070-Red	Red
ARC 12757::IRGC 41095-2	IRIS 313-11257	IRGC 127944	India	5-070-Red	Red
ARC 12800::IRGC 42720-2	IRIS 313-11296	IRGC 127945	India	5-070-Red	Red
ARC 13156::IRGC 22514-1	IRIS 313-10893	IRGC 128226	India	5-070-Red	Red
ARC 13257::IRGC 22608-1	IRIS 313-10895	IRGC 127151	India	5-070-Red	Red
ARC 13373::IRGC 22691-1	IRIS 313-10897	IRGC 128227	India	5-070-Red	Red
ARC 13591::IRGC 41177-2	IRIS 313-11260	IRGC 127950	India	5-070-Red	Red
ARC 14737::IRGC 41729-2	IRIS 313-11271	IRGC 127961	India	5-070-Red	Red
ARC 14899::IRGC 43016-1	IRIS 313-11302	IRGC 127154	India	5-070-Red	Red
ARC 14975::IRGC 41848-1	IRIS 313-11275	IRGC 127156	India	5-070-Red	Red
ARC 15091::IRGC 43048-1	IRIS 313-8332	IRGC 126298	India	5-070-Red	Red
ARC 15589::IRGC 42096-2	IRIS 313-11282	IRGC 132243	India	5-070-Red	Red
ARC 18112::IRGC 42274-1	IRIS 313-8982	IRGC 125655	India	5-070-Red	Red
ARC 18597::IRGC 43299-1	IRIS 313-8453	IRGC 126043	India	5-070-Red	Red
ARC 6188::IRGC 20370-1	IRIS 313-10848	IRGC 131968	India	5-070-Red	Red
ARC 7056::IRGC 40914-1	IRIS 313-11255	IRGC 127167	India	5-070-Red	Red
ARC 7236::IRGC 12335-1	IRIS 313-10667	IRGC 127168	India	5-070-Red	Red
BA BAI GU::IRGC 79580-1	IRIS 313-10221	IRGC 125663	China	5-070-Red	Red
BAO DAM::IRGC 89352-1	IRIS 313-12186	IRGC 128239	Lao People's Democratic Republic	5-070-Red	Red
BATCHA BHOG (SCENTED)::IRGC 49440-2	IRIS 313-11407	IRGC 127989	India	5-070-Red	Red
BELLO::IRGC 6658-2	IRIS 313-10542	IRGC 127992	India	5-070-Red	Red
CHAO PEUAK DENG::IRGC 11602-1	IRIS 313-10652	IRGC 127268	Lao People's Democratic Republic	5-070-Red	Red
CHITRAKALI::IRGC 49524-2	IRIS 313-11408	IRGC 128016	India	5-070-Red	Red
CHUA DAU::IRGC 4785-1	IRIS 313-9555	IRGC 120914	China	5-070-Red	Red
CR 157-392-4::IRGC 39247-2	IRIS 313-11240	IRGC 128020	India	5-070-Red	Red
DOK HIEN NOI::IRGC 107021-1	IRIS 313-12337	IRGC 127335	Lao People's Democratic Republic	5-070-Red	Red
DONGREM::IRGC 6688-1	IRIS 313-10544	IRGC 127340	India	5-070-Red	Red
DUBRAJ::IRGC 34904-1	IRIS 313-11167	IRGC 127343	India	5-070-Red	Red
DUDRE::IRGC 52523-1	IRIS 313-8631	IRGC 125608	India	5-070-Red	Red
DU GEN CHUAN::IRGC 70083-1	IRIS 313-11796	IRGC 127345	China	5-070-Red	Red
EA TIA::IRGC 29713-2	IRIS 313-11083	IRGC 132248	Lao People's Democratic Republic	5-070-Red	Red
EDAKKADAN 0-69-27::IRGC 19560-1	IRIS 313-10833	IRGC 127355	India	5-070-Red	Red
GAO JIAO BAI::IRGC 68047-1	IRIS 313-10178	IRGC 125748	China	5-070-Red	Red
GAO JIAO HONG::IRGC 80920-1	IRIS 313-12033	IRGC 127377	China	5-070-Red	Red
GAO LIANG ZAO::IRGC 59563-1	IRIS 313-11573	IRGC 127379	China	5-070-Red	Red
HOLDIGANTHI::IRGC 61105-1	IRIS 313-11607	IRGC 127411	India	5-070-Red	Red
HONG MI JIU GONG JI::IRGC 74031-1	IRIS 313-11909	IRGC 127414	China	5-070-Red	Red
HUA LI ZAO::IRGC 80950-1	IRIS 313-10224	IRGC 125766	China	5-070-Red	Red
IARI 11387::IRGC 19573-1	IRIS 313-10834	IRGC 128314	India	5-070-Red	Red
JIE CAO ZHAN::IRGC 70305-1	IRIS 313-11802	IRGC 127460	China	5-070-Red	Red
JIN JUN DAO::IRGC 59710-1	IRIS 313-8405	IRGC 125613	China	5-070-Red	Red
K 1074::IRGC 55017-1	IRIS 313-11505	IRGC 127469	India	5-070-Red	Red
KARI GURMATIA::IRGC 70850-1	IRIS 313-11827		India	5-070-Red	Red
KEERIPALA CHILL PADDY::IRGC 49790-1	IRIS 313-8559	IRGC 125615	India	5-070-Red	Red
KHAO HAE::IRGC 29773-3	IRIS 313-11085	IRGC 132273	Lao People's Democratic Republic	5-070-Red	Red
KUNJUKUNJU::IRGC 75448-1	IRIS 313-11937	IRGC 127535	India	5-070-Red	Red
KUTTA::IRGC 52184-1	IRIS 313-8924	IRGC 125815	India	5-070-Red	Red
LAI HIN::IRGC 99305-1	IRIS 313-12313	IRGC 135767	Lao People's Democratic Republic	5-070-Red	Red
LAI NOK KHA::IRGC 29604-2	IRIS 313-11076	IRGC 128094	Lao People's Democratic Republic	5-070-Red	Red
LANG QIAN CHE::IRGC 59730-1	IRIS 313-11577	IRGC 127551	China	5-070-Red	Red
LAOZAOGU::IRGC 93444-1	IRIS 313-12236	IRGC 127552	China	5-070-Red	Red
LG 10344::IRGC 99789-1	IRIS 313-12321	IRGC 127557	Lao People's Democratic Republic	5-070-Red	Red
LING TA 150::IRGC 1106-1	IRIS 313-10452	IRGC 127565	China	5-070-Red	Red
LIU TIAO XIAN::IRGC 72758-1	IRIS 313-11881	IRGC 127570	China	5-070-Red	Red
LIU XU::IRGC 109232-1	IRIS 313-10239	IRGC 125827	China	5-070-Red	Red
MAGU::IRGC 97027-1	IRIS 313-12275	IRGC 127590	China	5-070-Red	Red
MEE::IRGC 107773-1	IRIS 313-12352	IRGC 127621	Lao People's Democratic Republic	5-070-Red	Red
NCS 458::IRGC 62290-1	IRIS 313-11640	IRGC 127658	India	5-070-Red	Red
NCS 745::IRGC 62466-1	IRIS 313-11644	IRGC 127663	India	5-070-Red	Red
NCS 840::IRGC 62530-1	IRIS 313-9516	IRGC 126251	India	5-070-Red	Red
NONA BOKRA::IRGC 22710-C1	IRIS 313-7736	IRGC 122181	India	5-070-Red	Red
NYAO::IRGC 107091-1	IRIS 313-12340	IRGC 128412	Lao People's Democratic Republic	5-070-Red	Red
P 168::IRGC 1354-1	IRIS 313-10458	IRGC 127695	China	5-070-Red	Red
PANIKELASH::IRGC 46500-2	IRIS 313-11368	IRGC 128128	India	5-070-Red	Red
PERUNEL 0-69-18::IRGC 19581-1	IRIS 313-10835	IRGC 127727	India	5-070-Red	Red
PERUNEL::IRGC 63113-1	IRIS 313-8647	IRGC 125621	India	5-070-Red	Red
PISINI::IRGC 50035-2	IRIS 313-11420	IRGC 128138	India	5-070-Red	Red
PTB 18::IRGC 6105-1	IRIS 313-10523	IRGC 135786	India	5-070-Red	Red
QI GU::IRGC 77381-1	IRIS 313-11966	IRGC 127752	China	5-070-Red	Red
T 315::IRGC 54792-1	IRIS 313-8727	IRGC 126280	India	5-070-Red	Red
TONG GU HONG::IRGC 81026-1	IRIS 313-10226	IRGC 125925	China	5-070-Red	Red
VAIKATHARYAN::IRGC 52805-1	IRIS 313-11461	IRGC 127881	India	5-070-Red	Red
XI GAN JING REN::IRGC 60035-1	IRIS 313-9184	IRGC 126014	China	5-070-Red	Red
XITTO::IRGC 6671-1	IRIS 313-8622	IRGC 126294	India	5-070-Red	Red
YAN ZHAN::IRGC 79740-1	IRIS 313-12010	IRGC 127900	China	5-070-Red	Red
YOI::IRGC 82855-1	IRIS 313-12077	IRGC 127906	Lao People's Democratic Republic	5-070-Red	Red
YU HE HONG::IRGC 74266-1	IRIS 313-11910	IRGC 127907	China	5-070-Red	Red
YUN NAN ZHAN::IRGC 74272-1	IRIS 313-11911	IRGC 127908	China	5-070-Red	Red
Sen 8-14		IRGC 2813	Taiwan	5-070-Red	Red
Tango-Naketo 11		IRGC 2815	Taiwan	5-070-Red	Red
Taino 41		IRGC 2829	Taiwan	5-070-Red	Red
P 170		IRGC 5550	Taiwan	5-070-Red	Red
Ta Taao		IRGC 5600	Taiwan	5-070-Red	Red
Montano		IRGC 5601	Taiwan	5-070-Red	Red
Pin Chuan B		IRGC 5614	Taiwan	5-070-Red	Red
Gurusu		IRGC 7322	Taiwan	5-070-Red	Red
Perisa		IRGC 9042	Taiwan	5-070-Red	Red
Nanton 50		IRGC 10523	Taiwan	5-070-Red	Red
Nanton 215		IRGC 10534	Taiwan	5-070-Red	Red
435		IRGC 10538	Taiwan	5-070-Red	Red
Kung-Shan Wu-Shen-Ken		IRGC 11128	Taiwan	5-070-Red	Red
Hopots Utaiyaru		IRGC 17055	Taiwan	5-070-Red	Red
Quantung		IRGC 46547	Taiwan	5-070-Red	Red
Katupa-Ai		IRGC 70478	Taiwan	5-070-Red	Red
Kwan Fu Hsiang Nuo		IRGC 76315	Taiwan	5-070-Red	Red
Nanton 53		IRGC 10524	Taiwan	7-080-Purple	Purple
Nanton 84		IRGC 10526	Taiwan	7-080-Purple	Purple
242		IRGC 10536	Taiwan	7-080-Purple	Purple
